# Supplementary material
Source: PubMed Central journal article supplement (PMC6715406)
Supplement: jci-129-125957-s034.pdf [file jci-129-125957-s034.pdf]

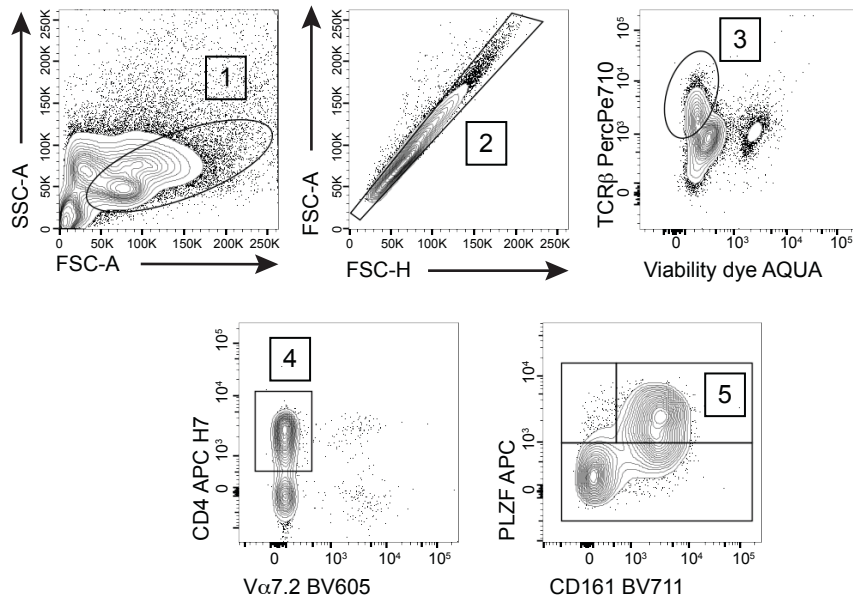

Supplemental Figure 1. Gating strategy for the identification of PLZF<sup>+</sup> T cells among fetal tissues, representative intestinal sample shown.

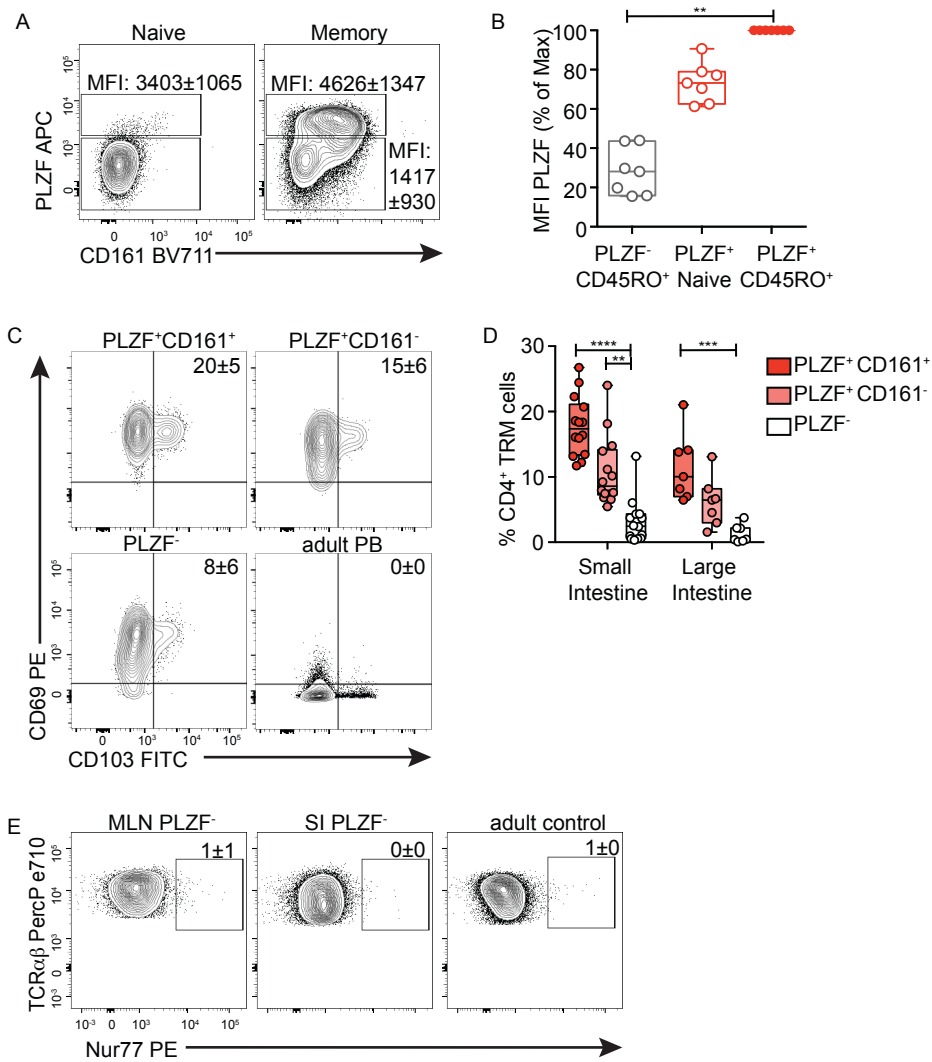

Supplemental Figure 2. Fetal PLZF<sup>+</sup> CD4<sup>+</sup> T cells display markers of resident memory T cells. (A) Representative flow plots of PLZF and CD161 staining among intestinal Naive (CD45RO<sup>-</sup>, CD45RA<sup>+</sup>, CCR7<sup>+</sup>) and memory (CD45RO<sup>+</sup>, CD45RA<sup>-</sup>) cells. The MFI (average ± SD) of PLZF is indicated for each population (n=7). (B) Normalized frequencies of PLZF MFI among indicated populations of intestinal V $\alpha$ 7.2<sup>+</sup> CD4<sup>+</sup> TCR $\alpha\beta$ <sup>+</sup> cells. (C) Representative flow plots of CD69 and CD103 staining among intestinal TEM (CD45RA<sup>-</sup>, CCR7<sup>-</sup>) cells. Gating based on adult PBMCs. (D) Frequencies of resident memory T cells (TRM) (CD69<sup>+</sup> CD103<sup>+</sup>) among fetal intestinal V $\alpha$ 7.2<sup>+</sup> CD4<sup>+</sup> TCR $\alpha\beta$ <sup>+</sup> cells. (E) Representative flow plots of endogenous Nur77 expression among PLZF<sup>-</sup> CD4<sup>+</sup> T cells derived from fetal SI and MLN compared to adult PBMCs. Numbers in flow cytometry plots represent frequencies of gated populations ± SD. Circles represent individual donors. Box plot whiskers span minimum and maximum, line represents median. Kruskal Wallis paired ANOVA with Dunn's multiple comparison test (B, D). \*\*p < 0.01, \*\*\*p < 0.001 \*\*\*\*p < 0.0001.

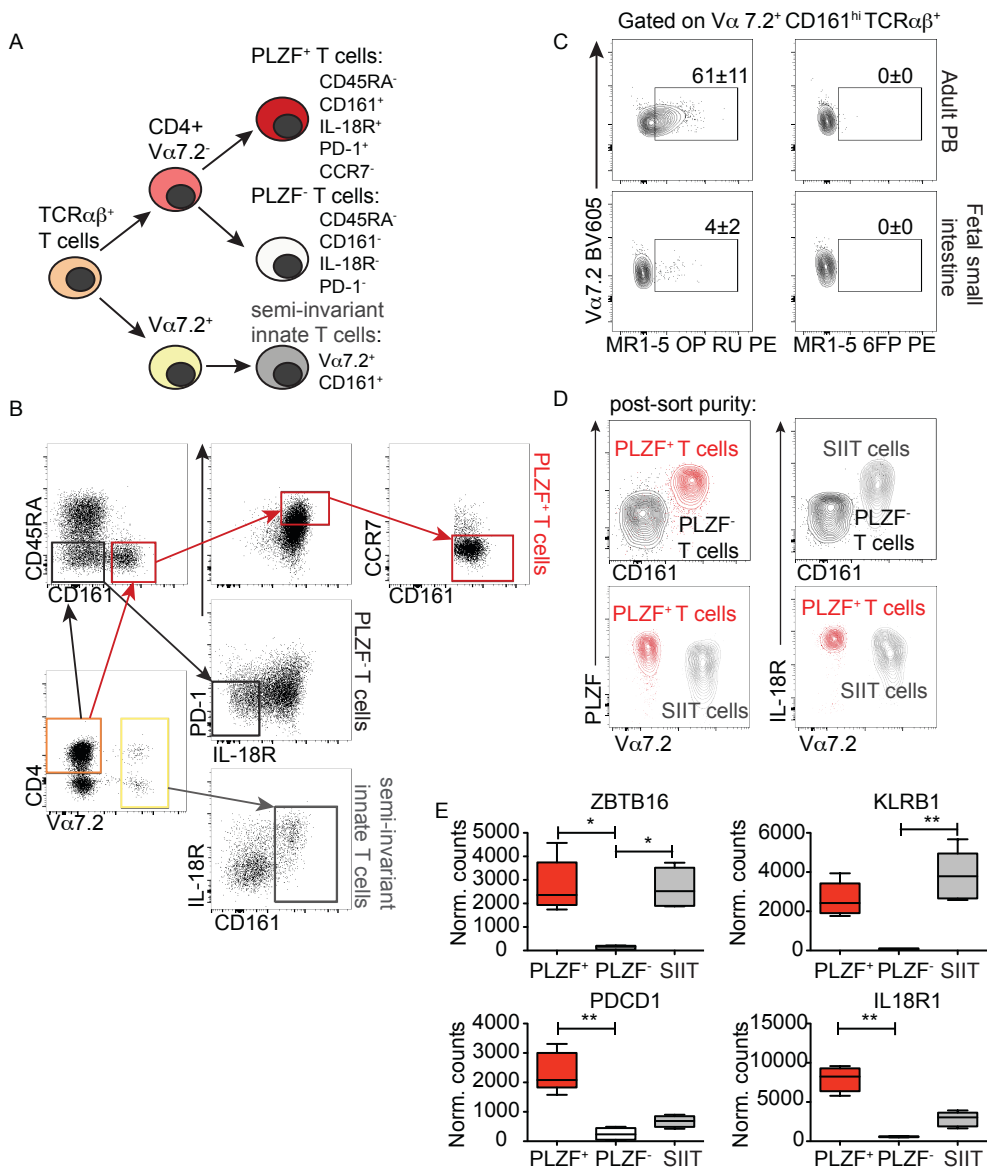

Supplemental Figure 3. Characteristics of sorted fetal T cell populations. (A) Schematic representation of the strategy for the identification and isolation of sorted RNAseq T cell populations. (B) Sorting strategy for PLZF<sup>+</sup> CD4<sup>+</sup> T cells, PLZF<sup>-</sup> CD4<sup>+</sup> T cells, and semi-invariant innate Va7.2<sup>+</sup> CD161<sup>+</sup> T cells gated on live, TCRαβ<sup>+</sup> intestinal T cells. (C) Representative flow plots of MAIT cell staining of adult PB (n=3) and fetal intestinal T cells (n=7). (D) Representative flow plots of post-sort purity after intra-nuclear staining for PLZF<sup>+</sup> CD4<sup>+</sup> T cells, PLZF<sup>-</sup> CD4<sup>+</sup> T cells, and semi-invariant innate Va7.2<sup>+</sup> CD161<sup>+</sup> T (SIIT) cells. (E) Boxplot quantification of RNAseq normalized read counts of indicated genes among sorted populations. \*p<0.05, \*\*p<0.01. Kruskal Wallis with Dunn's multiple comparison test (E).

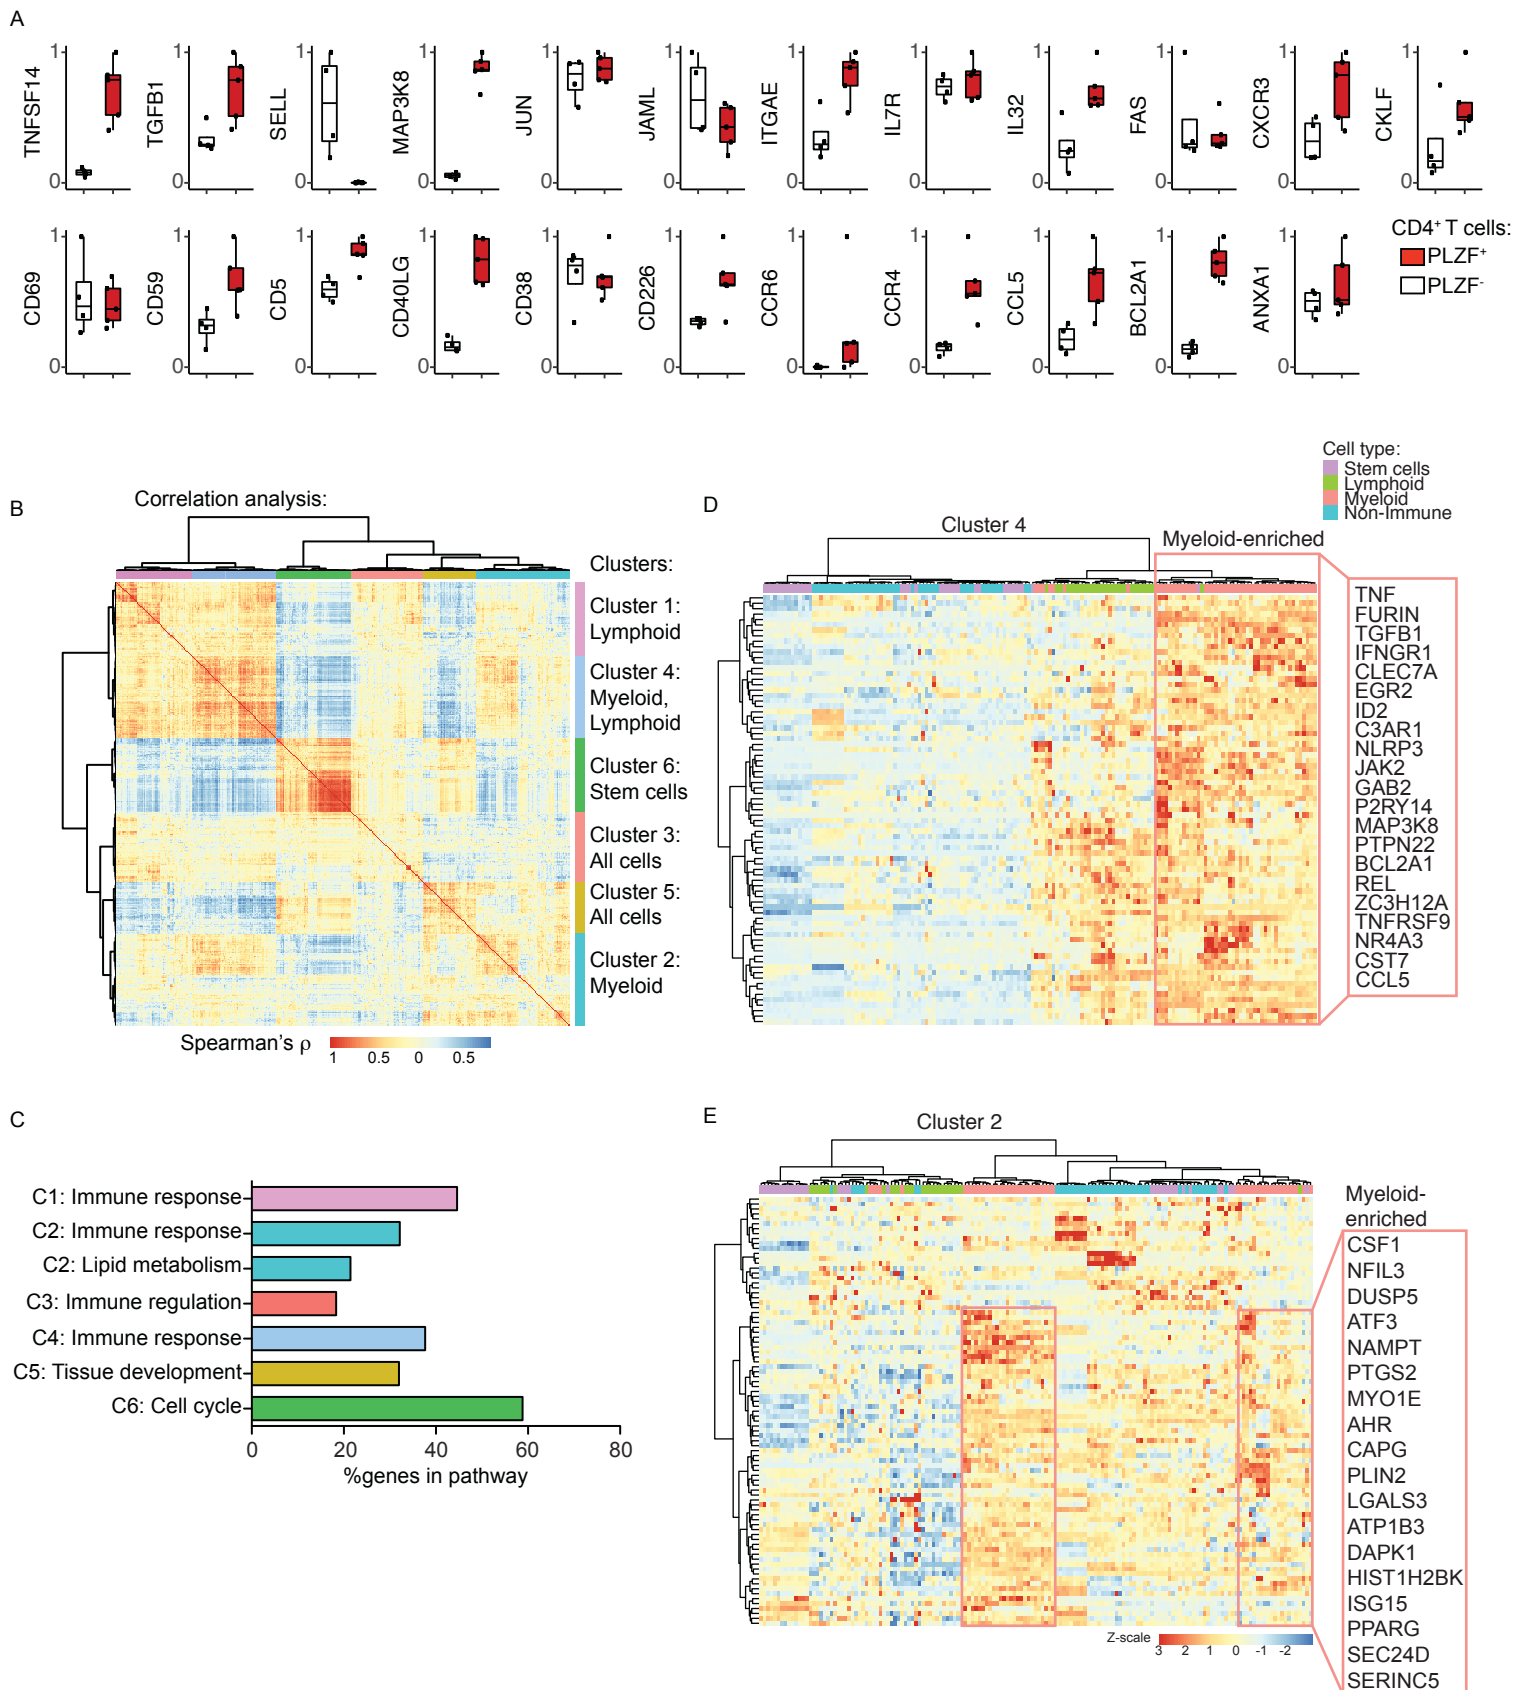

Supplemental Figure 4. Distinct transcriptional signature of fetal PLZF<sup>+</sup> CD4<sup>+</sup> T cells. (A) Normalized read counts of selected T cell memory- and activation-associated genes identified by RNAseq among sorted memory PLZF<sup>+</sup> (red) and PLZF<sup>-</sup> (white) CD4<sup>+</sup> T cells. (B) Correlation analysis using the Human Primary Cell Atlas as a reference of the differentially expressed genes (>2 fold, FDR<0.05) in PLZF<sup>+</sup> CD4<sup>+</sup> T cells as compared to PLZF<sup>-</sup> CD4<sup>+</sup> T cells revealing clusters of genes (C1-C6) that are co-expressed in the same cell types. (C) Pathway analysis of gene clusters identified by correlation analysis (B) was performed and gene pathways were organized into sub-clusters based on shared genes. Bar graphs show the % gene enrichment of each gene pathway within the indicated cluster. (D-E) Heatmap shows color-coded relative enrichment of differentially expressed genes in PLZF<sup>+</sup> CD4<sup>+</sup> T cells relative to PLZF<sup>-</sup> CD4<sup>+</sup> T cells among indicated cell types identified from the Human Primary Cell Atlas for (D) Cluster 4 and (E) Cluster 2. Selected myeloid-enriched genes involved in immune response and immune regulation are labeled.

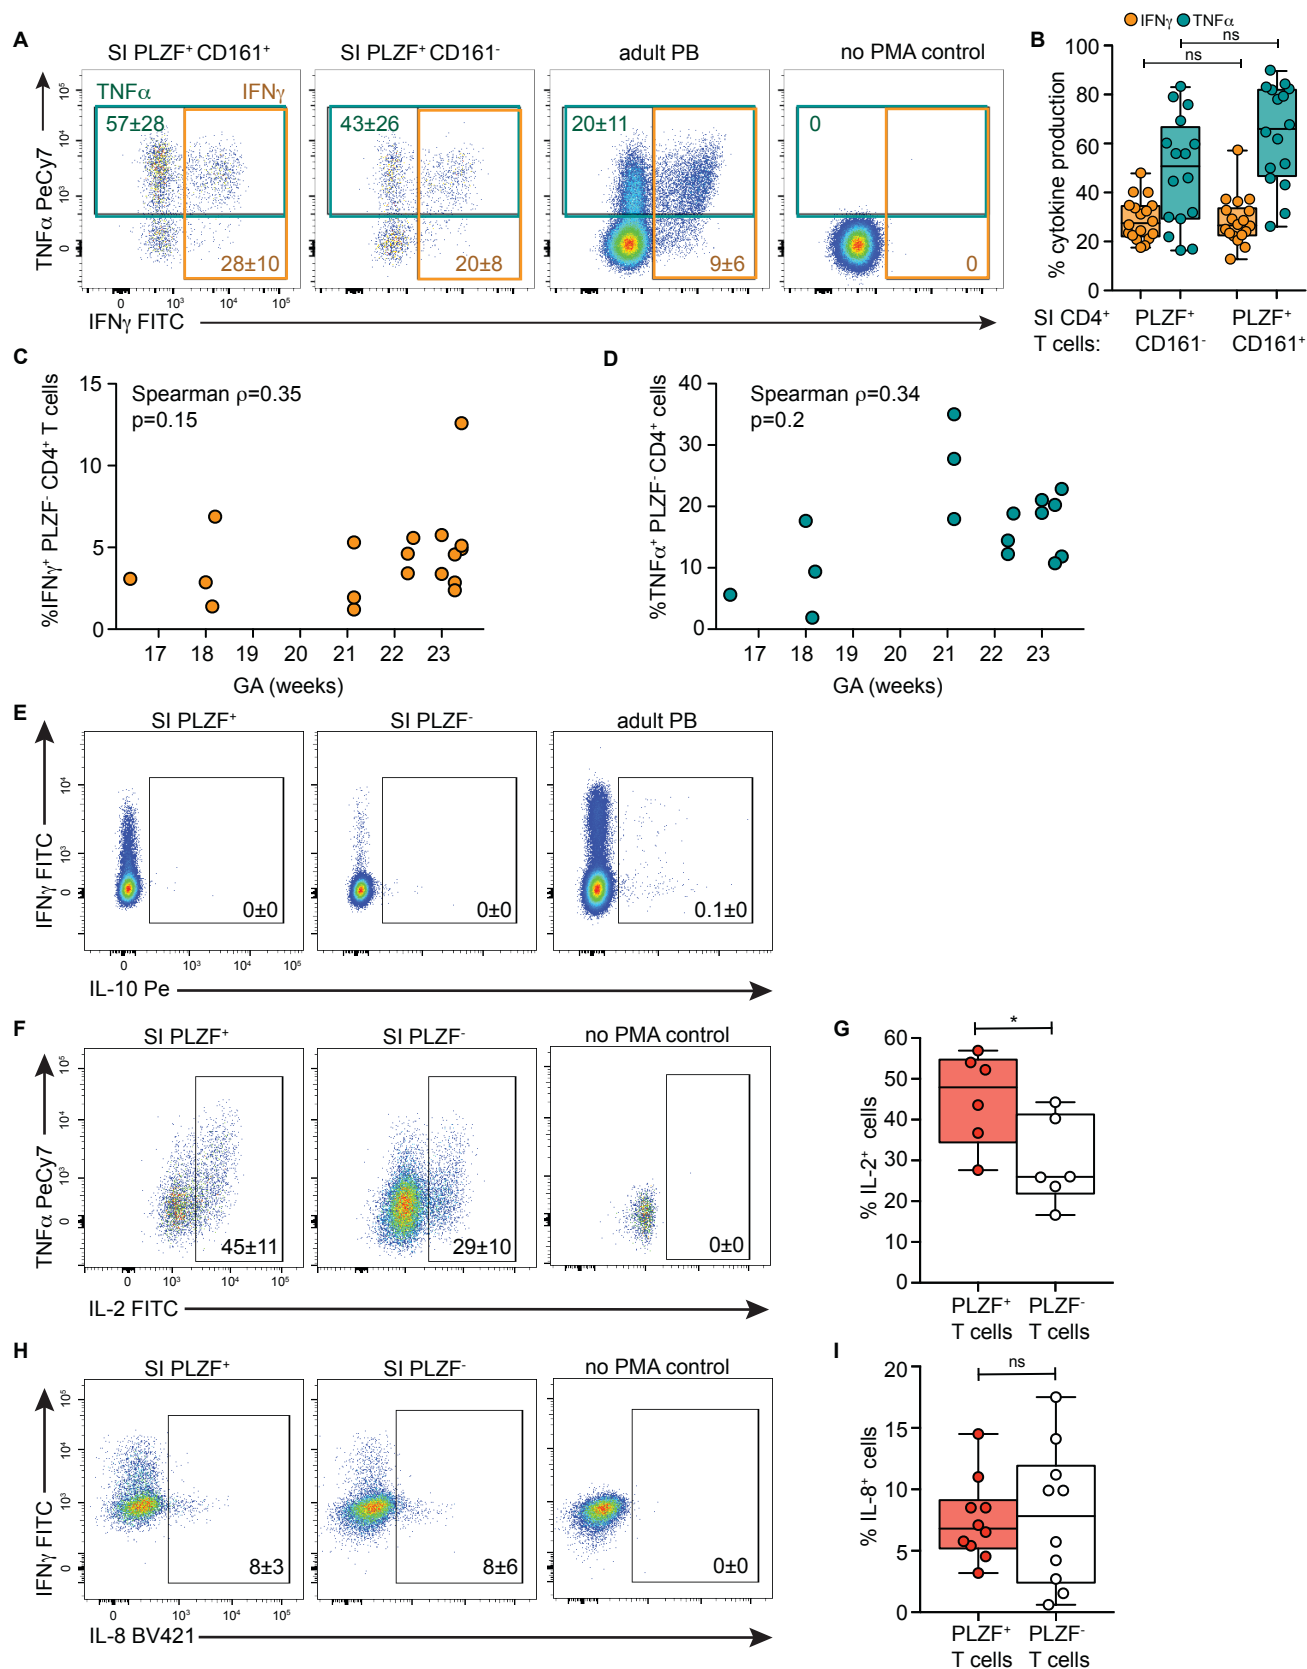

Supplemental Figure 5. SI-PLZF<sup>+</sup> CD4 T cells are poised for rapid production of Th1 cytokines. All samples gated on live V $\alpha$ 7.2: CD4<sup>+</sup> TCR $\alpha$  $\beta$ <sup>+</sup> cells. (A) Representative flow plots of intracellular TNF $\alpha$  and IFN $\gamma$  staining of indicated populations (n=18) after PMA/ionomycin stimulation of small intestine (SI) compared to adult PB CD4<sup>+</sup> T cells. Gates drawn on unstimulated control. (B) Frequencies of IFN $\gamma$ <sup>+</sup> and TNF $\alpha$ <sup>+</sup> cells within indicated populations of SI-PLZF<sup>+</sup> CD4<sup>+</sup> T cells after PMA/ionomycin stimulation. (C, D) Association between gestational age (GA) and (C) IFN $\gamma$  and (D) TNF $\alpha$  production by SI PLZF<sup>+</sup> CD4<sup>+</sup> T cells in response to PMA/ionomycin, Spearman's rank correlation. Circles represent individual donors. (E) Representative flow plots of intracellular IL-10 expression after PMA/ionomycin stimulation within indicated populations of SI CD4 T cells (n=5). (F, H) Representative flow plots of intracellular (F) IL-2 and (H) IL-8 after PMA/ionomycin stimulation within indicated populations of SI CD4 T cells. Gates drawn on unstimulated control. (G, I) Frequencies of (G) IL-2<sup>+</sup> and (I) IL-8<sup>+</sup> cells within indicated populations of SI CD4 T cells after PMA/ionomycin stimulation. Numbers in the flow cytometry plots correspond to the mean  $\pm$  SD of gated frequencies. Circles represent individual donors. Box plot whiskers span minimum and maximum, line represents median. Kruskal Wallis paired ANOVA with Dunn's multiple comparison test (B), Wilcoxon matched-pairs signed rank test (G, I). \* $p < 0.05$ , ns= not significant.

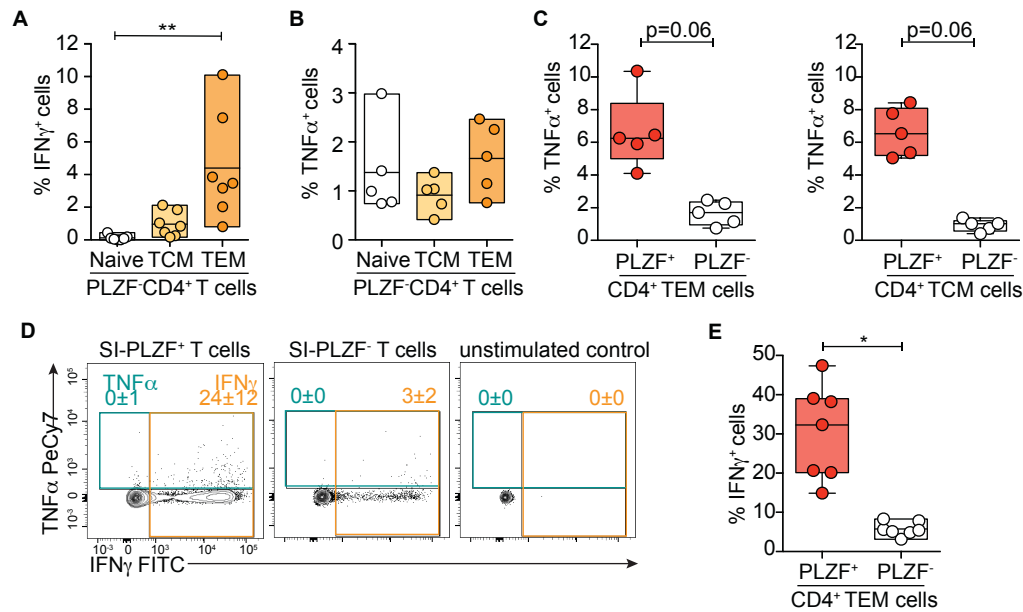

Supplemental Figure 6. SI-PLZF<sup>+</sup> CD4<sup>+</sup> T cells produce Th1 cytokines in response to both TCR- and cytokine-mediated activation. (A-B) Frequencies of (A) IFN $\gamma$ <sup>+</sup> and (B) TNF $\alpha$ <sup>+</sup> cells within indicated populations of SI PLZF<sup>-</sup> CD4<sup>+</sup> T cells after stimulation with anti-CD3 + anti-CD28 for 24hrs. (C) Frequencies of TNF $\alpha$ <sup>+</sup> cells within indicated populations of SI-derived TEM (left) and TCM (right) CD4<sup>+</sup> T cells after stimulation with anti-CD3 + CD28 for 24hrs. (D) Representative flow plots of intracellular staining for IFN $\gamma$  and TNF $\alpha$  among indicated populations of SI V $\alpha$ 7.2<sup>+</sup> CD4<sup>+</sup> TCR $\alpha$  $\beta$ <sup>+</sup> cells in response to stimulation with IL-12 + IL-18 for 24hrs. (E) Frequencies of IFN $\gamma$ <sup>+</sup> cells within indicated populations of intestinal TEM V $\alpha$ 7.2<sup>+</sup> CD4<sup>+</sup> TCR $\alpha$  $\beta$ <sup>+</sup> cells after stimulation with IL-12 + IL-18. Circles represent individual donors. Box plot whiskers span minimum and maximum, line represents mean. Wilcoxon matched-pairs signed rank test (A, B) and Mann-Whitney test (C, E). \*p < 0.05, \*\*p < 0.01, \*\*\*\*p < 0.0001.

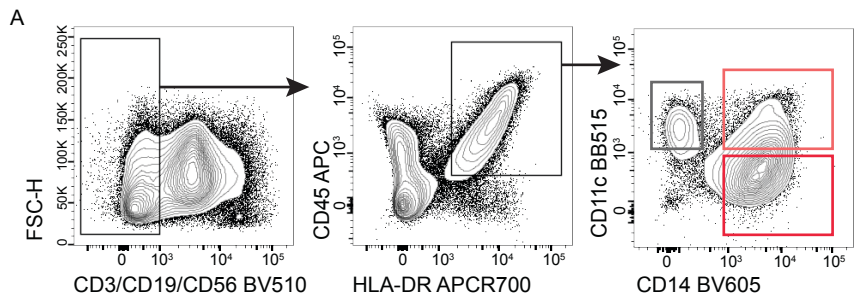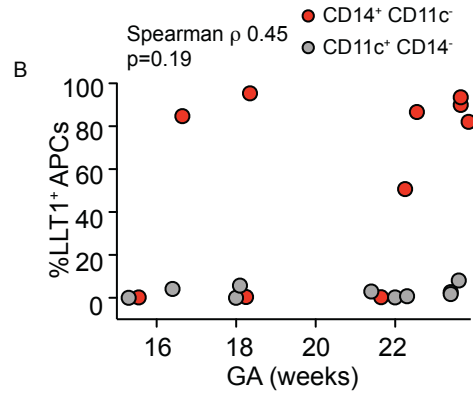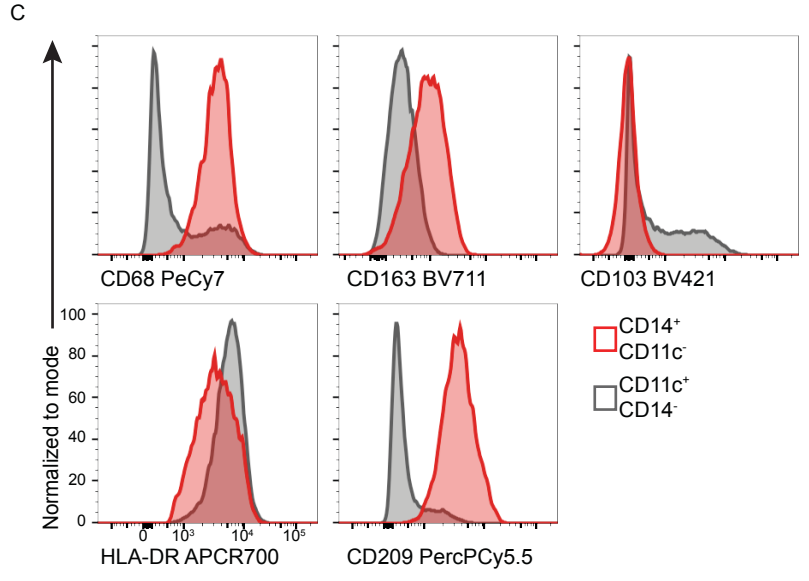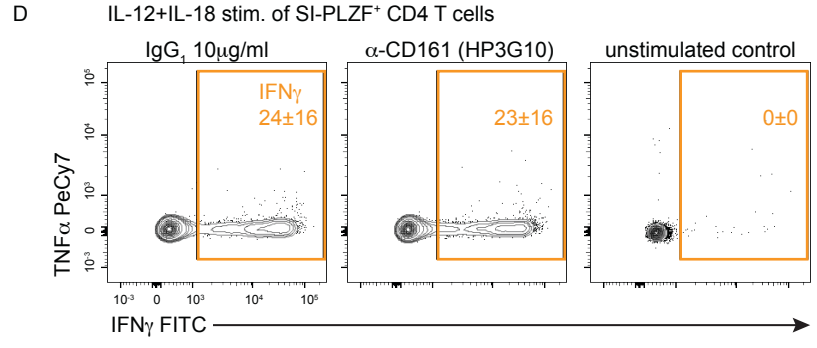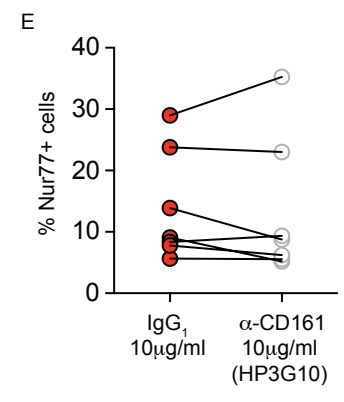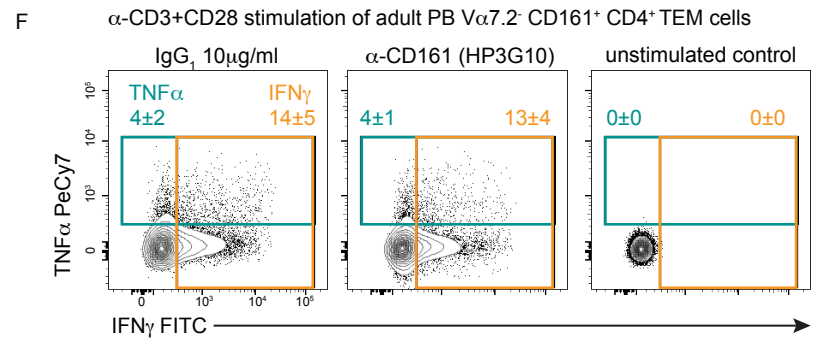

Supplemental Figure 7. Intestinal macrophages express LLT1, the ligand for CD161. (A) Gating strategy for the identification of antigen presenting cells (APCs) in fetal tissues. Cells are gated on live, Lineage<sup>-</sup> (CD3, CD19, CD56) cells and APCs identified as CD45<sup>+</sup> HLA-DR<sup>+</sup> cells. APC subsets are defined on the basis of CD11c and CD14 expression. (B) Association between LLT1 expression by intestinal APCs and gestational age (GA), Spearman's rank correlation. (C) Representative histograms of surface markers in CD14<sup>+</sup> CD11c<sup>-</sup> intestinal macrophages as compared to CD11c<sup>+</sup> CD14<sup>-</sup> dendritic cells (n= 12). (D) Representative flow plots of intracellular cytokine staining in SI-PLZF<sup>+</sup> Va7.2- TCR $\alpha\beta$ <sup>+</sup> CD4<sup>+</sup> T cells stimulated with IL-12 + IL-18 in the presence of cross-linked anti-CD161 antibodies or isotype controls. (n=6) (E) Frequency of Nur77<sup>+</sup> cells among SI-PLZF<sup>+</sup> Va7.2- TCR $\alpha\beta$ <sup>+</sup> CD4<sup>+</sup> T cells following 4hrs of stimulation with anti-CD3 + anti-CD28 in the presence of cross-linked anti-CD161 antibodies or isotype controls. (F) Representative flow plots of intracellular cytokine staining in adult peripheral blood (PB) CD161<sup>+</sup> Va7.2- TCR $\alpha\beta$ <sup>+</sup> CD4<sup>+</sup> TEM cells stimulated with anti-CD3 + anti-CD28 in the presence of cross-linked anti-CD161 antibodies or isotype controls (n=9). Gates are drawn on unstimulated controls. Circles represent individual donors. Numbers in the flow cytometry plots correspond to the frequency mean  $\pm$  SD of the gated populations.

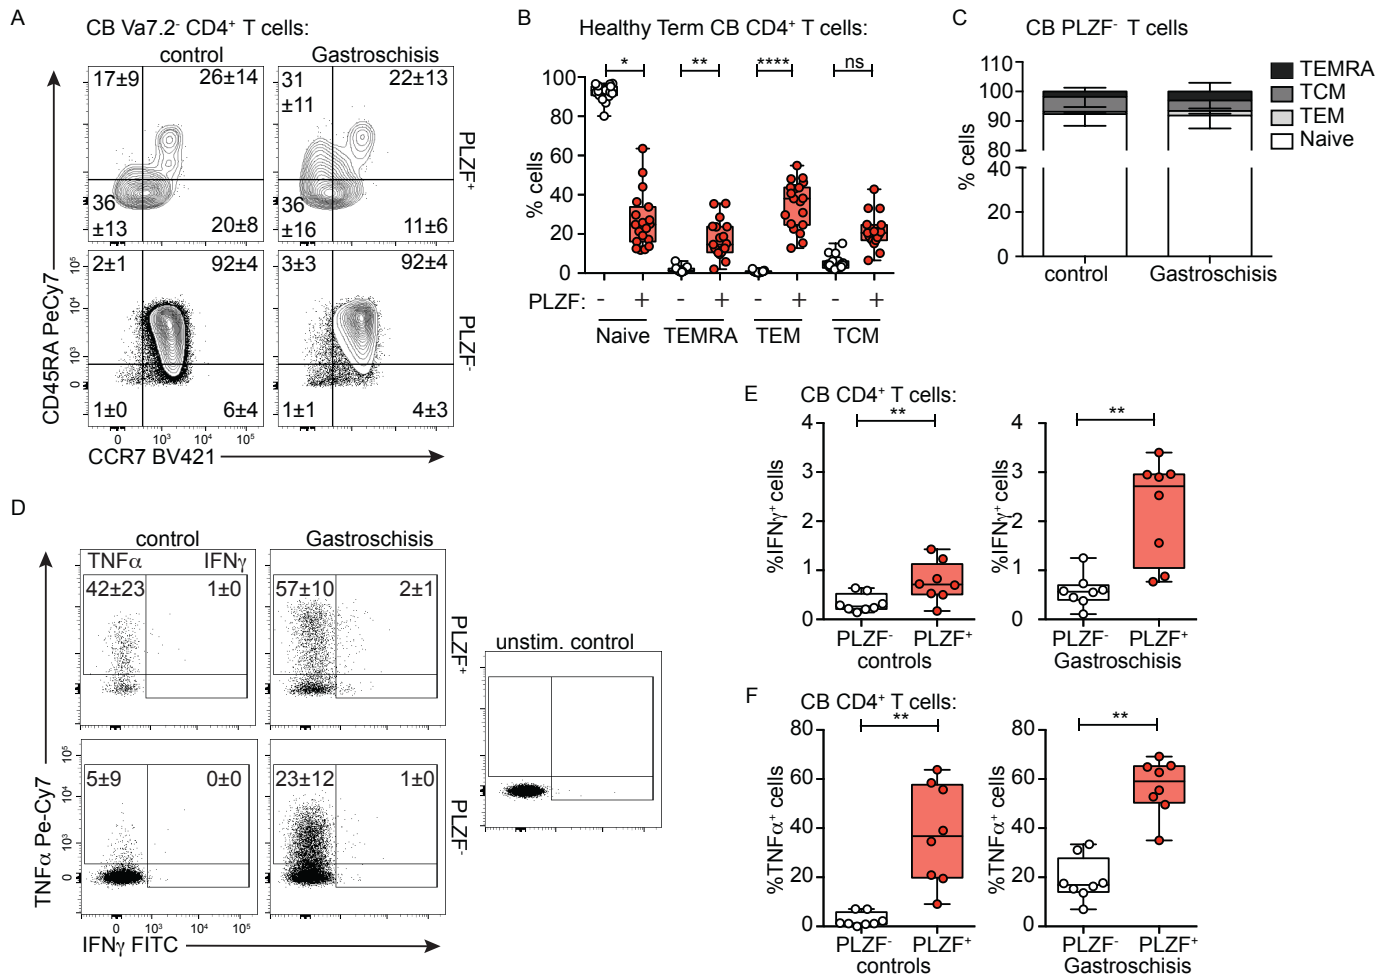

Supplemental Figure 8. Umbilical cord blood PLZF<sup>+</sup> CD4<sup>+</sup> T cells possess greater Th1 effector potential than their PLZF<sup>-</sup> counterparts. (A) Representative flow plots of CD45RA and CCR7 expression among indicated populations of V $\alpha$ 7.2<sup>+</sup> TCR $\alpha\beta$ <sup>+</sup> CD4<sup>+</sup> T cells in cord blood (CB) of healthy controls (n=23) and gastrostschisis (n=8) samples. (B) Frequencies of Naive, central memory (TCM), effector memory (TEM), and terminally differentiated effector memory, CD45RA<sup>+</sup> (TEMRA) T cells among indicated populations of V $\alpha$ 7.2<sup>+</sup> TCR $\alpha\beta$ <sup>+</sup> CD4<sup>+</sup> T cells in the CB of healthy controls. (C) Frequencies of Naive, TCM, TEM, and TEMRA cells among CB PLZF<sup>-</sup> CD4<sup>+</sup> T cells in infants with gastrostschisis (n=8) compared to healthy controls (n=23). (D) Representative flow plots and (E, F) frequencies of (E) IFN $\gamma$  and (F) TNF $\alpha$  production within PLZF<sup>+</sup> and PLZF<sup>-</sup> populations of CB V $\alpha$ 7.2<sup>+</sup> TCR $\alpha\beta$ <sup>+</sup> CD4<sup>+</sup> T cells in healthy controls compared to infants with gastrostschisis after PMA/Ionomycin stimulation. Numbers in the flow cytometry plots correspond to the mean  $\pm$  SD of gated populations. Bar graphs represent mean with SD. Circles represent individual donors. Box plot whiskers span minimum and maximum, line represents median. Mann-Whitney test (B, C), Wilcoxon matched pairs test (E, F). \*\*p < 0.01, \*\*\*p < 0.001. \*\*\*\*p < 0.0001.



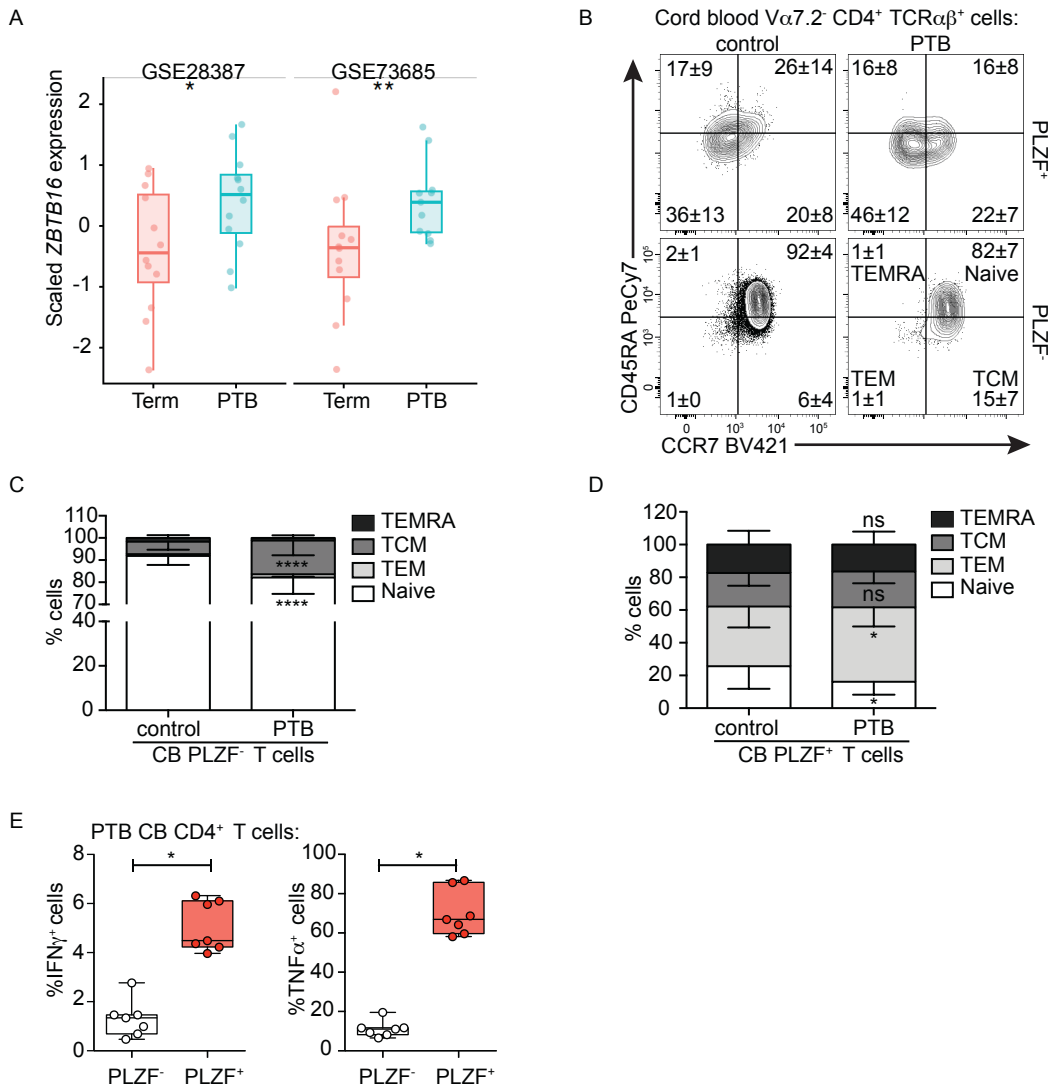

Supplemental Figure 9. Effector PLZF<sup>+</sup> CD4<sup>+</sup> T cells are enriched in the umbilical cord blood of preterm infants. (A) Scaled expression of the gene encoding PLZF (*ZBTB16*) in two independent gene data sets comparing the cord blood (CB) of term to preterm birth (PTB) infants. (B) Representative flow plots of CD45RA and CCR7 expression among indicated populations of  $V\alpha 7.2^+ TCR\alpha\beta^+ CD4^+$  T cells in the CB of PTB samples (n=20) compared to healthy controls (n=23). (C-D) Frequencies of Naive, central memory (TCM), effector memory (TEM), and terminally differentiated effector memory, CD45RA<sup>+</sup> (TEMRA) cells among (C) PLZF<sup>-</sup> and (D) PLZF<sup>+</sup>  $V\alpha 7.2^+ TCR\alpha\beta^+ CD4^+$  T cells in the CB of PTB samples (n=20) compared to healthy controls (n=23). (E) Frequencies of IFN $\gamma^+$  (left) and TNF $\alpha^+$  (right) producing cells among indicated populations of CB  $V\alpha 7.2^+ TCR\alpha\beta^+ CD4^+$  T cells in PTB samples after PMA/Ionomycin stimulation. Boxplots show median (central line), interquartile range (box), 25- and 75 percentiles (whiskers) (A). Numbers in the flow cytometry plots correspond to the mean  $\pm$  SD of gated populations. Bar graphs represent mean with SD. Circles represent individual donors. Box plot whiskers span minimum and maximum, line represents median. One-sided Wilcoxon rank sum test (A). Mann-Whitney test (C, D), Wilcoxon matched-pairs test (E). \*p<0.05, \*\*p < 0.01, \*\*\*p < 0.001. \*\*\*\*p < 0.0001.

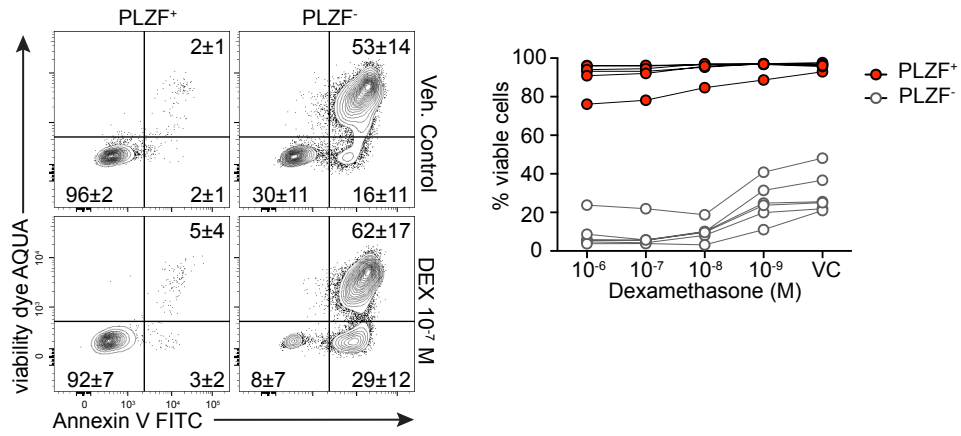

Supplemental Figure 10. SI-PLZF<sup>+</sup> CD4<sup>+</sup> T cells are resistant to glucocorticoid induced apoptosis. Representative flow plots (left panels) of annexin V and viability dye expressions and frequencies of viable cells (right panel) among SI-PLZF<sup>+</sup> and PLZF<sup>-</sup> CD45RA<sup>-</sup> CD4<sup>+</sup> T cells cultured in the presence of indicated doses of dexamethasone (Dex) or ethanol vehicle control (VC) for 36hrs. Circles represent individual donors. Numbers in flow cytometry plots represent frequency mean ± SD of the gated populations.

Supplementary Table 1. Characteristics of fetal T cell populations for RNA sequencing

| T cell type                       | PLZF <sup>+</sup> CD4 T cells | PLZF <sup>-</sup> CD4 T cells | Va7.2 <sup>+</sup> CD161 <sup>+</sup> T cells |
|-----------------------------------|-------------------------------|-------------------------------|-----------------------------------------------|
| # of samples                      | 5                             | 4                             | 5                                             |
| Tissue source                     | Small intestine               | Small intestine               | Small intestine & MLN                         |
| GA (weeks)                        | 22-23                         | 22                            | 22                                            |
| Sort purity (%)<br>Mean $\pm$ -SD | 87 $\pm$ 0.01                 | 92 $\pm$ 0.03                 | 94 $\pm$ 0.04                                 |

Supplementary Table 2. DE Genes in PLZF<sup>+</sup> CD4<sup>+</sup> T cells vs Va7.2<sup>+</sup> CD161<sup>+</sup> T cells

| Gene       | Log2FC      | FDR         |
|------------|-------------|-------------|
| GAS8       | 10.01581985 | 1.21E-05    |
| TRAV26-1   | 8.814430989 | 7.59E-13    |
| TRAV20     | 8.333782452 | 1.96E-06    |
| TRAV21     | 7.063808469 | 6.04E-13    |
| MYEOV      | 6.77370463  | 0.047542937 |
| ADCY6      | 6.429269334 | 1.23E-09    |
| MSS51      | 6.420325736 | 3.64E-05    |
| FRS3       | 6.214673112 | 6.25381E-04 |
| CCDC149    | 5.631702785 | 0.014304291 |
| WWC3-AS1   | 5.483344109 | 5.09746E-04 |
| LINC01814  | 5.379573289 | 0.004717018 |
| PFN2       | 5.222091647 | 0.026045555 |
| CDRT4      | 4.964928173 | 0.019268641 |
| DMD        | 4.952881824 | 0.020520576 |
| IFT43      | 4.929516169 | 7.19E-05    |
| GUSBP5     | 4.902677375 | 0.045371407 |
| MMRN1      | 4.856047988 | 9.06416E-04 |
| KLHDC7B    | 4.850155884 | 0.019268641 |
| AC009283.1 | 4.703164771 | 0.040810328 |
| LINC01229  | 4.565746595 | 8.02E-05    |
| FBXL19-AS1 | 4.317902201 | 0.005264555 |
| AC044781.1 | 4.286583357 | 4.43E-09    |
| ZNF319     | 4.117723796 | 0.005419629 |
| HLF        | 4.030209517 | 0.020298534 |
| TRAV17     | 3.926055709 | 0.001494983 |
| GNAO1      | 3.911421971 | 0.026045555 |
| LRP1B      | 3.873635194 | 6.57E-10    |
| SLC6A4     | 3.772292395 | 0.049881175 |
| HLA-K      | 3.743729119 | 9.94E-05    |
| AC016747.3 | 3.66817823  | 0.035099238 |
| ZSWIM5     | 3.622439575 | 0.045404893 |
| SLC24A4    | 3.590119155 | 0.039189337 |
| TRAV12-2   | 3.578498905 | 0.0227905   |
| SCN3B      | 3.570456559 | 0.001778164 |
| KLRF2      | 3.509538681 | 0.041566854 |
| TMPRSS11E  | 3.483167791 | 0.014436405 |
| LPCAT2     | 3.452116995 | 8.53E-05    |

|            |             |             |
|------------|-------------|-------------|
| PLAT       | 3.43291453  | 0.001522666 |
| ODF3B      | 3.407088547 | 0.041566854 |
| AC091185.1 | 3.400526745 | 0.046192113 |
| BMF        | 3.369941763 | 7.90364E-04 |
| GTF2IP23   | 3.3395061   | 0.008765623 |
| AC004593.1 | 3.309964598 | 0.02478848  |
| PRR5L      | 3.305889414 | 0.033560213 |
| KLHL29     | 3.238248733 | 9.32E-10    |
| LINC00892  | 3.236907741 | 0.013636345 |
| MIR3142HG  | 3.227088854 | 7.12601E-04 |
| RNF165     | 3.226294705 | 0.004336233 |
| MTCO2P11   | 3.171862563 | 0.012801899 |
| TRAV8-6    | 3.130975572 | 0.024873332 |
| GAD1       | 3.128197144 | 3.77663E-04 |
| C2orf66    | 3.127235456 | 0.001525214 |
| TTC38      | 3.105787001 | 0.028713485 |
| CYP2S1     | 3.099475548 | 0.017350476 |
| TCAP       | 3.085653745 | 0.005311873 |
| CYTOR      | 3.007046367 | 0.001932993 |
| C6orf47    | 2.986838749 | 0.008480612 |
| ATP9A      | 2.950214598 | 0.01671815  |
| DUSP6      | 2.898197389 | 7.91E-05    |
| ALPK1      | 2.859075365 | 6.84238E-04 |
| PLAC9      | 2.858649672 | 0.034195629 |
| CENPBD1P1  | 2.832898908 | 0.00108182  |
| C9orf64    | 2.818751442 | 0.046955676 |
| EGLN3      | 2.743045175 | 0.016818901 |
| BST2       | 2.70321588  | 8.97019E-04 |
| TRAV13-1   | 2.695372688 | 3.17E-05    |
| LIF        | 2.693260846 | 8.53E-05    |
| PTPMT1     | 2.668473717 | 0.021270375 |
| CD4        | 2.617794699 | 1.21E-05    |
| AC023449.2 | 2.614588364 | 0.002607664 |
| RPL23AP55  | 2.609190175 | 0.04820469  |
| SAMD4A     | 2.590802564 | 0.038714893 |
| CHN2       | 2.521450565 | 0.004389233 |
| HOXB3      | 2.51332424  | 1.63E-05    |
| MCOLN3     | 2.502773386 | 0.007968557 |
| SPART      | 2.502677265 | 0.004326857 |

|            |             |             |
|------------|-------------|-------------|
| SMIM3      | 2.484716459 | 4.23E-06    |
| NPTX1      | 2.459541363 | 0.011474571 |
| C7orf49    | 2.422824335 | 0.009768915 |
| H1F0       | 2.419792543 | 2.35772E-04 |
| KIAA1549   | 2.41472096  | 0.023142236 |
| CYB561     | 2.402748883 | 0.031341236 |
| MID1IP1    | 2.384904452 | 7.11769E-04 |
| PALLD      | 2.37310774  | 9.04E-07    |
| CINP       | 2.33747779  | 0.021421304 |
| TTYH2      | 2.33677165  | 0.031176216 |
| RTKN2      | 2.321700837 | 0.00045943  |
| CDADC1     | 2.313210368 | 0.019675057 |
| ZNF395     | 2.311979957 | 0.031697098 |
| KIAA1107   | 2.304996865 | 0.014896717 |
| PGAP1      | 2.300859577 | 3.42388E-04 |
| RIPOR3     | 2.294236901 | 0.041671171 |
| CDC42EP4   | 2.281755056 | 0.040801796 |
| UBE2F      | 2.274067717 | 6.53E-13    |
| ZNF462     | 2.266674392 | 9.04E-05    |
| VDR        | 2.264042186 | 8.32976E-04 |
| P2RY1      | 2.255194088 | 0.014436405 |
| PLA2G16    | 2.23740614  | 0.008546397 |
| ESR2       | 2.219514767 | 0.001254172 |
| GGT1       | 2.196062427 | 0.022806625 |
| TLR1       | 2.172575292 | 9.61112E-04 |
| NLRP6      | 2.128440154 | 1.01E-05    |
| LXN        | 2.122515727 | 0.009793535 |
| DOCK5      | 2.111749026 | 1.02E-06    |
| GRAMD1B    | 2.094829236 | 2.82E-08    |
| SNX18      | 2.082552529 | 0.013126444 |
| CST7       | 2.076828727 | 1.12E-05    |
| SLC25A1    | 2.056474502 | 0.035243655 |
| ZNF528-AS1 | 2.042534738 | 0.042178398 |
| IL2        | 2.040731993 | 0.002126244 |
| ASB2       | 2.03212369  | 0.004412941 |
| DPY19L1    | 2.025695441 | 0.031985485 |
| RCBTB2     | 1.986461102 | 0.03291841  |
| CISH       | 1.974147569 | 0.022309691 |
| ARID5B     | 1.970591951 | 4.86E-19    |

|            |             |             |
|------------|-------------|-------------|
| P2RY14     | 1.953018896 | 4.91E-05    |
| SCUBE1     | 1.946656456 | 0.048658702 |
| DUSP4      | 1.935592938 | 2.39835E-04 |
| PLEKHG1    | 1.927474074 | 0.009400153 |
| GAB2       | 1.927053275 | 2.98E-21    |
| AL390208.1 | 1.923882103 | 0.048683543 |
| LRRC2      | 1.919810803 | 0.018001414 |
| DTX1       | 1.918442078 | 6.84025E-04 |
| ABR        | 1.917343965 | 0.0001162   |
| AFAP1      | 1.912105609 | 1.78E-05    |
| NCDN       | 1.904877674 | 0.013418405 |
| ARHGEF12   | 1.903626071 | 0.005521805 |
| BCL2A1     | 1.900922167 | 3.08E-08    |
| AL133406.2 | 1.892733593 | 0.007628144 |
| THAP7      | 1.873816246 | 0.013592454 |
| VPS54      | 1.865544299 | 3.55E-13    |
| ATP13A2    | 1.827616338 | 0.001750583 |
| MAP3K8     | 1.827426214 | 7.66E-05    |
| LRP6       | 1.822209162 | 0.042797748 |
| PHPT1      | 1.81889843  | 0.031018226 |
| CD300A     | 1.811336165 | 0.019675057 |
| ATXN7L2    | 1.806631178 | 0.003786258 |
| PDCD1      | 1.798317904 | 0.029557672 |
| CD40LG     | 1.791625725 | 2.60E-10    |
| IRAK2      | 1.791215116 | 0.013096404 |
| TBCCD1     | 1.780860984 | 0.046955676 |
| LRIG1      | 1.77813719  | 2.75E-06    |
| GPR137B    | 1.755314343 | 0.03797555  |
| TSR3       | 1.743964818 | 0.037534487 |
| SOCS2      | 1.743196208 | 3.96914E-04 |
| EXOSC3     | 1.743155032 | 0.030150516 |
| SLC1A4     | 1.741573746 | 2.31966E-04 |
| GRK5       | 1.741344318 | 9.47E-34    |
| PRKAB1     | 1.738384414 | 1.42375E-04 |
| LPAR6      | 1.733554288 | 0.00690225  |
| PLXNA4     | 1.729183798 | 0.033305887 |
| SYNE3      | 1.692694647 | 0.020211151 |
| DUSP5      | 1.690242777 | 0.00260957  |
| INCENP     | 1.672575297 | 7.82091E-04 |

|            |             |             |
|------------|-------------|-------------|
| IL18RAP    | 1.660853557 | 0.005919817 |
| GLB1       | 1.657827044 | 3.27778E-04 |
| AC027031.2 | 1.657805604 | 0.038714893 |
| DLL1       | 1.65682454  | 1.35E-05    |
| KIAA0040   | 1.638966347 | 0.036077961 |
| XCL2       | 1.633672504 | 0.032372686 |
| CD274      | 1.630340302 | 0.003720721 |
| RALB       | 1.629340774 | 0.038714893 |
| PRKAB2     | 1.628105641 | 0.009660066 |
| PBX4       | 1.623857186 | 0.001995104 |
| UCK1       | 1.616708486 | 0.01066676  |
| ZBTB38     | 1.61193739  | 0.00653626  |
| SSH1       | 1.604669235 | 4.47E-08    |
| UBE2M      | 1.582902105 | 0.00523284  |
| ZNF571     | 1.582411465 | 0.001302104 |
| HNRNPLL    | 1.581613001 | 1.65229E-04 |
| MAMLD1     | 1.580044746 | 0.029982203 |
| MFSD5      | 1.564848175 | 0.006924519 |
| ITGAV      | 1.5155935   | 0.003902073 |
| LINC01871  | 1.515430174 | 0.036390225 |
| NT5E       | 1.498393396 | 0.042234078 |
| OTUD7B     | 1.488539744 | 0.001740296 |
| IL18R1     | 1.487277504 | 1.59E-07    |
| ARHGAP21   | 1.48166889  | 8.51E-05    |
| SNX11      | 1.47665699  | 0.01775243  |
| AHR        | 1.476178037 | 0.001256224 |
| EPAS1      | 1.465748048 | 9.00E-06    |
| AP3M2      | 1.459820668 | 2.00E-10    |
| BTLA       | 1.450544284 | 0.037687373 |
| TRMT12     | 1.438058348 | 0.025216225 |
| RAB33B     | 1.421758419 | 0.003043861 |
| PIGU       | 1.406355045 | 0.019505157 |
| AC005332.7 | 1.404965181 | 0.026337459 |
| PDHX       | 1.398150052 | 0.019492944 |
| SPAG5      | 1.396491743 | 0.014560646 |
| TGIF1      | 1.388272569 | 5.67525E-04 |
| KLF5       | 1.380528957 | 0.040770447 |
| SH3TC1     | 1.375607887 | 0.042052955 |
| KIAA1109   | 1.361465533 | 4.73E-09    |



|            |             |             |
|------------|-------------|-------------|
| TGFBR3     | 1.360257594 | 7.16E-06    |
| ZCCHC2     | 1.359203267 | 2.11E-07    |
| TRAT1      | 1.356413378 | 2.43406E-04 |
| SLC35A3    | 1.337298452 | 0.009400153 |
| HIC1       | 1.327855713 | 0.023365383 |
| IL2RB      | 1.323652319 | 2.11E-07    |
| PML        | 1.322234013 | 0.01071197  |
| ADAM19     | 1.316259741 | 2.43406E-04 |
| TESC       | 1.315119816 | 0.041969377 |
| ADGRG6     | 1.305032812 | 0.041566854 |
| NF1        | 1.304814362 | 0.002948513 |
| KSR1       | 1.303706477 | 0.013737809 |
| CCR4       | 1.300548366 | 0.002484828 |
| LINC00963  | 1.297655804 | 1.02E-05    |
| RHBDD2     | 1.287147058 | 0.002461035 |
| WEE1       | 1.27098518  | 9.42496E-04 |
| ZNF552     | 1.268294341 | 0.001528616 |
| CEP76      | 1.260662785 | 0.03481864  |
| ID2        | 1.257197627 | 8.23E-05    |
| ZNF704     | 1.252704196 | 1.22395E-04 |
| NFE2L1     | 1.242499577 | 0.044255808 |
| STARD4     | 1.242248929 | 0.006976169 |
| IL32       | 1.235455541 | 0.039138046 |
| KIF3B      | 1.234412867 | 0.011680284 |
| PIK3R1     | 1.228170543 | 0.006777556 |
| RB1        | 1.227367743 | 0.00523284  |
| AC023510.2 | 1.225308424 | 0.001593811 |
| SLC44A1    | 1.220844698 | 0.044600123 |
| CPD        | 1.220829745 | 1.48E-05    |
| RARRES3    | 1.215911303 | 5.66E-05    |
| SYTL3      | 1.210545779 | 9.28E-07    |
| ARHGAP5    | 1.205991555 | 0.021137958 |
| ANKRD54    | 1.199026262 | 0.034031449 |
| PLIN2      | 1.190645879 | 5.76098E-04 |
| TYW5       | 1.189897468 | 0.030901684 |
| CD59       | 1.189825849 | 0.005828647 |
| AC006978.1 | 1.18151163  | 0.00985195  |
| MAP3K20    | 1.181280897 | 0.042346563 |
| ZFP30      | 1.175193109 | 0.010574414 |

|         |             |             |
|---------|-------------|-------------|
| AMZ2    | 1.171348279 | 0.001538041 |
| C6orf89 | 1.169021577 | 0.015173564 |
| CD5     | 1.163044968 | 3.54E-12    |
| DAG1    | 1.162739578 | 0.016417145 |
| RPA1    | 1.160541313 | 0.023036648 |
| ANXA11  | 1.158404462 | 1.21E-05    |
| SMIM15  | 1.156397828 | 0.037683756 |
| BAZ2B   | 1.142958146 | 1.34243E-04 |
| GLO1    | 1.135473089 | 0.007912482 |
| ZER1    | 1.134165931 | 0.049549313 |
| EPST1   | 1.131373255 | 0.01459934  |
| PXK     | 1.12488539  | 0.001686289 |
| FADS3   | 1.113446283 | 0.021137958 |
| TAB2    | 1.110370467 | 2.64E-05    |
| SFMBT2  | 1.106988126 | 0.00372044  |
| MGRN1   | 1.105189843 | 1.87E-06    |
| KIF3A   | 1.105022581 | 0.045857041 |
| ARAP2   | 1.101276605 | 0.019505157 |
| RAB5B   | 1.10026813  | 0.005688474 |
| BAG4    | 1.094437026 | 0.038714893 |
| CLECL1  | 1.086550816 | 0.037143946 |
| FAAH2   | 1.085030368 | 0.004665155 |
| TMEM9B  | 1.0846513   | 2.25088E-04 |
| RHBDF2  | 1.083666672 | 0.033023588 |
| TAF5    | 1.082584585 | 0.041563856 |
| NFATC2  | 1.081599407 | 2.06E-06    |
| TNIP1   | 1.079404523 | 0.006265044 |
| SPPL3   | 1.073826951 | 0.004895356 |
| RASGRF2 | 1.070757581 | 0.001814669 |
| AKAP11  | 1.067169872 | 0.010814313 |
| SFXN1   | 1.066740823 | 0.004624188 |
| ATP1B3  | 1.063162408 | 0.031176216 |
| CARS    | 1.058638509 | 0.003265702 |
| CASP8   | 1.057049793 | 0.002447011 |
| MAST4   | 1.047189315 | 0.002334176 |
| MIR22HG | 1.044716848 | 6.13354E-04 |
| SEC24D  | 1.037055295 | 0.010942819 |
| GALC    | 1.034623743 | 0.034195629 |
| LRMP    | 1.033174684 | 0.002170789 |

|          |             |             |
|----------|-------------|-------------|
| LCMT1    | 1.025545197 | 0.040011649 |
| DPYD     | 1.021952403 | 0.041566854 |
| IDS      | 1.020781513 | 0.001275145 |
| PLCL1    | 1.020201023 | 0.034493792 |
| DVL3     | 1.019727142 | 0.001434737 |
| CNNM3    | 1.010794264 | 0.033023588 |
| KIF1B    | 1.001930047 | 0.010761024 |
| PDCL3    | 0.990646619 | 0.005723534 |
| SERPINB1 | 0.989506452 | 0.045569492 |
| TRAF6    | 0.988102686 | 0.043118943 |
| SAMSN1   | 0.983840736 | 2.77E-05    |
| TAB3     | 0.982188034 | 0.046517174 |
| ASAP1    | 0.979490039 | 0.001970944 |
| GARS     | 0.979272874 | 0.001188768 |
| DYNC1LI2 | 0.972172917 | 0.004156913 |
| FURIN    | 0.968808533 | 0.031547362 |
| NR3C1    | 0.967937415 | 0.003780138 |
| SHC1     | 0.963649386 | 0.008340435 |
| NPIP3    | 0.962720815 | 0.046955676 |
| SPPL2A   | 0.955403299 | 0.004418532 |
| KLHL2    | 0.950598759 | 0.034668244 |
| ENOSF1   | 0.945224973 | 0.009354116 |
| LRRFIP2  | 0.942420847 | 0.041714496 |
| SEC61A2  | 0.941737277 | 0.045371407 |
| CTSB     | 0.938935674 | 0.039467373 |
| RASGRP1  | 0.93037646  | 7.64414E-04 |
| UBE2E1   | 0.924039189 | 0.035590314 |
| PRDX2    | 0.923124798 | 0.022324017 |
| PLXDC1   | 0.922146122 | 0.049265389 |
| ZNF37BP  | 0.920846201 | 5.04136E-04 |
| STX17    | 0.920489848 | 0.016067832 |
| APP      | 0.91774908  | 0.022758198 |
| BCL2L11  | 0.917087314 | 0.027959084 |
| IFITM3   | 0.915819321 | 0.011767411 |
| SGTA     | 0.915735036 | 0.035992345 |
| DEGS1    | 0.914920216 | 0.030980316 |
| RFX7     | 0.911259454 | 0.023647493 |
| TBL1X    | 0.908049108 | 0.010149136 |
| GATA3    | 0.906854231 | 0.014631438 |

|          |             |             |
|----------|-------------|-------------|
| IQGAP2   | 0.900978495 | 0.016562656 |
| NRIP1    | 0.900447821 | 0.034595235 |
| HSD17B4  | 0.898637719 | 0.029025075 |
| GLIPR1   | 0.888326178 | 6.43602E-04 |
| AKAP13   | 0.886894774 | 7.53377E-04 |
| PTP4A2   | 0.885155439 | 3.39519E-04 |
| TIPARP   | 0.88292928  | 0.003933521 |
| FBXL5    | 0.882463997 | 0.016281202 |
| CLSTN1   | 0.8686845   | 0.019505512 |
| NFKBIZ   | 0.867427688 | 0.003732844 |
| ZBTB40   | 0.861834861 | 0.039138046 |
| GSTK1    | 0.861133582 | 0.022730212 |
| OS9      | 0.859439707 | 0.036812129 |
| RUBCN    | 0.857662617 | 0.015424678 |
| ABCC1    | 0.848367527 | 3.83845E-04 |
| TTC39C   | 0.846990106 | 0.001442124 |
| C15orf39 | 0.844999704 | 0.029697666 |
| KLHL18   | 0.83761285  | 0.046988638 |
| DENND4C  | 0.837007228 | 0.006349755 |
| MAFG     | 0.836923091 | 0.011767411 |
| SMS      | 0.836738329 | 0.03797555  |
| CRIM1    | 0.8360761   | 0.001094011 |
| RTN3     | 0.833086957 | 0.030810948 |
| FGFR1OP2 | 0.828310575 | 0.004773213 |
| EXOC5    | 0.827389263 | 0.015424678 |
| ZNF106   | 0.824856018 | 0.003929486 |
| TMEM2    | 0.822961356 | 2.37124E-04 |
| OPTN     | 0.818670314 | 3.39519E-04 |
| INPP5D   | 0.816371557 | 8.32E-07    |
| PLEKHG2  | 0.815454706 | 0.020520576 |
| MAML3    | 0.814324404 | 0.016067832 |
| ZMIZ1    | 0.806327701 | 0.007770762 |
| RFTN1    | 0.805835304 | 0.001970944 |
| PPP1R16B | 0.804082733 | 7.05E-05    |
| PTPN22   | 0.799085974 | 0.016818901 |
| NUDT21   | 0.790558488 | 0.006056683 |
| RAB1B    | 0.788514001 | 0.020317799 |
| NCOA7    | 0.782981353 | 0.008916087 |
| FAM208A  | 0.776616066 | 0.034493792 |

|            |             |             |
|------------|-------------|-------------|
| ICOS       | 0.77611248  | 0.016184052 |
| AC093110.1 | 0.774584934 | 0.042865278 |
| IMP4       | 0.772267544 | 0.005228879 |
| NCOR2      | 0.769283397 | 0.032717256 |
| ST3GAL1    | 0.768591037 | 0.024443896 |
| FYN        | 0.767962032 | 4.26245E-04 |
| TRAK2      | 0.764202215 | 0.047209533 |
| RBMXL1     | 0.764040818 | 0.039439372 |
| AUTS2      | 0.763209606 | 0.002484828 |
| ZCCHC8     | 0.752802096 | 0.016818901 |
| TLK1       | 0.751467582 | 0.006349755 |
| PFKFB3     | 0.750363547 | 0.003933521 |
| ZFP91      | 0.745974964 | 0.049791445 |
| SENP6      | 0.742533547 | 5.43071E-04 |
| HGSNAT     | 0.730080264 | 0.019814823 |
| SYNE2      | 0.729962378 | 0.049279666 |
| WASHC4     | 0.723877619 | 0.013330567 |
| STAM       | 0.718865396 | 3.29522E-04 |
| HTT        | 0.712031045 | 0.01900679  |
| PCNX1      | 0.705484339 | 0.046955676 |
| HTATSF1    | 0.705430911 | 4.38247E-04 |
| ANKRD52    | 0.704829922 | 0.023647493 |
| SMC5       | 0.701123089 | 8.85E-05    |
| EPRS       | 0.69463046  | 2.90952E-04 |
| SEC11C     | 0.69277673  | 0.041671171 |
| SLC5A6     | 0.681960012 | 0.034493792 |
| STYX       | 0.678725019 | 0.028029923 |
| IL17RA     | 0.673691273 | 0.034493792 |
| ANKFY1     | 0.673617878 | 0.037092202 |
| AARS       | 0.669714346 | 0.040302519 |
| KCMF1      | 0.669541556 | 0.023102629 |
| ETV6       | 0.665075815 | 0.046834287 |
| THAP2      | 0.66349554  | 0.045890886 |
| GAPDH      | 0.651550806 | 0.012714824 |
| CD6        | 0.649083164 | 0.024925937 |
| CHMP4B     | 0.638149412 | 0.003137756 |
| SRGN       | 0.634611019 | 0.023676698 |
| INPP4A     | 0.618583593 | 0.045776145 |
| USO1       | 0.60329648  | 0.007726846 |

|           |              |             |
|-----------|--------------|-------------|
| MRPS6     | 0.599406214  | 0.007726846 |
| KIDINS220 | 0.597007745  | 0.021270375 |
| HNRNPUL1  | 0.596848458  | 0.001449041 |
| CRY1      | 0.592578413  | 0.03201919  |
| FBXO9     | 0.586923557  | 0.037635609 |
| OPA1      | 0.584978066  | 0.042178398 |
| SMC3      | 0.580469512  | 0.011435859 |
| DAZAP2    | 0.580116625  | 0.010123325 |
| CD96      | 0.57600065   | 0.007522332 |
| UBC       | 0.575918596  | 0.033259067 |
| ARFGAP3   | 0.566493256  | 0.043228749 |
| USP15     | 0.559819798  | 0.01928532  |
| CTDSP2    | 0.557473348  | 0.027505356 |
| SPTBN1    | 0.545957094  | 0.041399658 |
| SMURF2    | 0.540261107  | 0.044441236 |
| PHF12     | 0.534221753  | 0.003044514 |
| ABI1      | 0.518158129  | 0.017052827 |
| RNF168    | 0.496694447  | 0.049549313 |
| SH3GLB1   | 0.495455012  | 0.001798207 |
| ARHGEF7   | 0.494851655  | 0.039620463 |
| UHMK1     | 0.481940657  | 0.035766749 |
| YY1       | 0.473585223  | 0.004689267 |
| MSI2      | 0.464493387  | 0.047585662 |
| FBXL20    | 0.451388093  | 0.006288875 |
| SEC63     | 0.421017064  | 0.035099238 |
| TMED2     | 0.335803454  | 0.035199958 |
| TOP2B     | 0.312510284  | 0.035039533 |
| RBM33     | 0.292899846  | 0.034493792 |
| DNAJA2    | -0.349662607 | 0.004599652 |
| PTPRC     | -0.394041352 | 0.049350505 |
| HNRNPA1   | -0.396814443 | 0.008979503 |
| ZCCHC11   | -0.405628035 | 0.048563125 |
| DDX21     | -0.44198314  | 0.038714893 |
| SETD1B    | -0.460316096 | 0.034493792 |
| PAFAH1B1  | -0.46692766  | 0.006056683 |
| RSRP1     | -0.467523509 | 0.037687373 |
| TNFAIP3   | -0.471277196 | 0.015981884 |
| CCND2     | -0.499605884 | 0.022758198 |
| EEF1B2    | -0.521435664 | 0.03291841  |

|                |              |             |
|----------------|--------------|-------------|
| HNRNPH1        | -0.53337111  | 4.42126E-04 |
| ACTG1          | -0.540199741 | 0.029673023 |
| EIF4B          | -0.54591193  | 0.019505512 |
| ZNF277         | -0.547038885 | 0.014280772 |
| EIF4A2         | -0.549946579 | 0.042825789 |
| JUN            | -0.567700273 | 0.019844253 |
| SRSF2          | -0.577175237 | 0.012801899 |
| FCMR           | -0.58494588  | 0.032389446 |
| HSPA8          | -0.59287282  | 0.00776778  |
| LDHA           | -0.615762318 | 0.032389446 |
| EIF3L          | -0.620550066 | 0.037876587 |
| ZEB1           | -0.629707049 | 0.026919158 |
| YBX1           | -0.631537747 | 0.021907533 |
| EIF3H          | -0.633598978 | 0.038714893 |
| RNF213         | -0.645747784 | 0.031176216 |
| CENPC          | -0.650709862 | 0.037559009 |
| CHD1           | -0.658860513 | 0.013126444 |
| LRPPRC         | -0.662686709 | 0.028185017 |
| TAF1D          | -0.666372844 | 7.48E-07    |
| RACK1          | -0.667819207 | 0.015981884 |
| SMAP2          | -0.668253901 | 9.26E-07    |
| DDX6           | -0.677855105 | 0.00712352  |
| SYNGAP1        | -0.687452837 | 0.037531148 |
| MEPCE          | -0.691262641 | 0.034195629 |
| JMJD1C         | -0.698456379 | 0.020053231 |
| HNRNPA1P4<br>8 | -0.699715041 | 0.037531148 |
| RPS3           | -0.70039206  | 0.008101008 |
| RPS9           | -0.704105974 | 0.022119792 |
| ATP5F1         | -0.711875224 | 0.002814273 |
| LIMD2          | -0.719106229 | 0.002484828 |
| SDE2           | -0.719867319 | 0.007726846 |
| EIF4A3         | -0.72716031  | 0.005206558 |
| LUC7L          | -0.73050226  | 1.76E-05    |
| MFSD14A        | -0.735294727 | 0.010677703 |
| TPP2           | -0.736922555 | 7.48E-07    |
| BACH2          | -0.738845561 | 0.004980754 |
| MARF1          | -0.742250759 | 0.048315838 |
| ACTR8          | -0.748809595 | 0.033023588 |

|            |              |             |
|------------|--------------|-------------|
| RPL5       | -0.749873577 | 0.024438406 |
| MYCBP2     | -0.756505254 | 0.031697098 |
| KIF21B     | -0.775965246 | 0.029390833 |
| SPG7       | -0.782662014 | 0.043143687 |
| EIF3E      | -0.786812818 | 0.002346877 |
| PPIA       | -0.787988489 | 9.51E-05    |
| BTG1       | -0.79463619  | 0.048658702 |
| MAML2      | -0.797513587 | 6.23496E-04 |
| EIF2S3     | -0.80092949  | 0.011882315 |
| SNHG1      | -0.808989919 | 0.047453385 |
| TFRC       | -0.821998795 | 0.030322684 |
| TCP11L2    | -0.828112686 | 0.012198733 |
| ZNF280D    | -0.836536889 | 0.041634485 |
| BBX        | -0.841256856 | 0.034031449 |
| NR1D1      | -0.841763499 | 0.019358888 |
| EPB41      | -0.850773708 | 3.84E-05    |
| CD48       | -0.851788861 | 0.015984807 |
| ZNF548     | -0.853309596 | 0.028029923 |
| MACF1      | -0.860985965 | 0.001169807 |
| MSH2       | -0.865954955 | 0.048315838 |
| PMPCA      | -0.873515807 | 0.037226728 |
| GAS5       | -0.879495993 | 0.010216666 |
| DDX18      | -0.885246395 | 0.016212063 |
| RRN3P1     | -0.891040214 | 9.65389E-04 |
| PIK3CG     | -0.893810988 | 0.019434769 |
| YPEL5      | -0.895046275 | 0.019668359 |
| NPM1       | -0.896319517 | 7.66E-06    |
| SLC20A1    | -0.90061079  | 0.001537856 |
| COA1       | -0.902628109 | 7.68178E-04 |
| TSC22D3    | -0.9079688   | 0.037262599 |
| R3HDM1     | -0.908076309 | 0.010761024 |
| ZSCAN25    | -0.909131052 | 0.03252034  |
| MRPL1      | -0.909368298 | 0.047970034 |
| LDLRAD4    | -0.912248969 | 0.043484839 |
| PIAS2      | -0.921461284 | 0.036750075 |
| STK17A     | -0.923574117 | 1.16E-13    |
| TARBP1     | -0.92430929  | 0.031697098 |
| TET3       | -0.932604776 | 0.009597569 |
| AC078814.1 | -0.937195453 | 0.042052955 |



|                |              |             |
|----------------|--------------|-------------|
| BABAM2         | -0.941234152 | 0.034493792 |
| TWISTNB        | -0.941242457 | 0.041566854 |
| SYNE1          | -0.944312455 | 0.002176021 |
| GTF2H1         | -0.947017136 | 0.04820469  |
| NLRP1          | -0.954644426 | 0.028969049 |
| R3HDM2         | -0.957618423 | 0.034747008 |
| AC027290.2     | -0.971578938 | 0.017226979 |
| ADD3           | -0.974161053 | 0.049881175 |
| ZNF827         | -0.974329798 | 0.005104449 |
| CCNT1          | -0.979239039 | 0.009354116 |
| PRNP           | -0.981197041 | 0.04357777  |
| TGIF2          | -0.981376975 | 0.026938988 |
| TANC2          | -0.981994608 | 0.003425143 |
| NDFIP1         | -0.991104985 | 0.007726846 |
| FKBP4          | -0.995780121 | 0.011476825 |
| LDHB           | -0.99827353  | 0.029610177 |
| RMND5A         | -1.008964135 | 1.12E-07    |
| MLLT3          | -1.020221205 | 0.002240947 |
| NPAT           | -1.021174629 | 0.014977483 |
| CCDC18-<br>AS1 | -1.022310751 | 0.002325102 |
| CHD7           | -1.029087721 | 2.11333E-04 |
| SLC35D1        | -1.031442678 | 0.034806456 |
| RIPOR2         | -1.035141014 | 0.009736783 |
| NFYA           | -1.037113551 | 0.014611824 |
| AP000662.1     | -1.040725432 | 0.024438406 |
| ATP8A1         | -1.044338286 | 0.002323138 |
| KNTC1          | -1.053675788 | 0.02685228  |
| CUX1           | -1.056467693 | 0.001253359 |
| PPP1R7         | -1.061596413 | 0.016067832 |
| ZAP70          | -1.067547477 | 0.001509024 |
| DUSP10         | -1.071153839 | 6.86E-08    |
| GTF2I          | -1.074289388 | 0.015531354 |
| CREBZF         | -1.076235568 | 0.01049327  |
| CERK           | -1.077382464 | 0.006938669 |
| SCML1          | -1.077462633 | 6.84238E-04 |
| STK38          | -1.080469121 | 0.001303451 |
| PCID2          | -1.085314825 | 0.043484839 |
| RASSF2         | -1.09173342  | 1.73949E-04 |

|         |              |             |
|---------|--------------|-------------|
| ELL2    | -1.092026342 | 0.006238389 |
| GUK1    | -1.092951099 | 0.001253359 |
| MCAM    | -1.098731533 | 0.016096826 |
| SOX4    | -1.099983918 | 0.015863685 |
| ZNF721  | -1.102688819 | 2.04646E-04 |
| PGM2L1  | -1.103265937 | 0.010654398 |
| MIOS    | -1.109494777 | 0.023647493 |
| DAAM1   | -1.114989723 | 0.003023859 |
| BMP2K   | -1.120506094 | 0.038738816 |
| DBNL    | -1.121320279 | 0.019284146 |
| ATM     | -1.121507027 | 1.18E-05    |
| NOL4L   | -1.121840183 | 0.002195788 |
| FOS     | -1.123182898 | 0.004979491 |
| IRF4    | -1.12492819  | 0.009722783 |
| ZNF561  | -1.131157833 | 0.032389446 |
| USP11   | -1.131172925 | 0.006780137 |
| FOXRED1 | -1.135792008 | 0.032389446 |
| SYTL2   | -1.140881197 | 0.009702514 |
| FYB1    | -1.14845902  | 1.72E-06    |
| CXCR4   | -1.151794188 | 0.001580301 |
| DGKA    | -1.156447373 | 0.00985195  |
| MBP     | -1.158987807 | 0.01685206  |
| PRKCB   | -1.161020825 | 0.008815885 |
| NKRF    | -1.164003647 | 0.021231178 |
| SEMA4D  | -1.168302801 | 2.41287E-04 |
| CD52    | -1.173776897 | 0.003275443 |
| ABLIM1  | -1.17967497  | 6.41E-05    |
| GRK6    | -1.18567205  | 0.009124377 |
| PIK3IP1 | -1.1951371   | 1.39868E-04 |
| ODC1    | -1.196775706 | 0.00308307  |
| RASA3   | -1.200535522 | 1.04771E-04 |
| CD55    | -1.201963052 | 1.40E-05    |
| RPL7P23 | -1.204017975 | 0.039495635 |
| SNHG14  | -1.208690888 | 0.00059194  |
| NSMCE2  | -1.216098631 | 0.001166408 |
| MT-ATP8 | -1.222485051 | 0.02757122  |
| DPH5    | -1.223354938 | 0.034493792 |
| KLHDC4  | -1.229800641 | 0.002075047 |
| UROD    | -1.232787174 | 0.036060184 |

|            |              |             |
|------------|--------------|-------------|
| ATP2B1     | -1.239667187 | 1.84E-07    |
| AHCYL2     | -1.239734438 | 0.038714893 |
| CASK       | -1.249688965 | 0.009553515 |
| RRM1       | -1.254603126 | 0.004734175 |
| FAM46C     | -1.263822504 | 0.006549483 |
| LINC00861  | -1.269085743 | 9.55193E-04 |
| KLF3       | -1.284753128 | 4.49E-06    |
| AC020898.1 | -1.284761425 | 0.045857041 |
| JAML       | -1.288773392 | 0.009176043 |
| CFAP97     | -1.29580851  | 0.024443896 |
| PELI2      | -1.296534315 | 0.015424678 |
| PAPOLG     | -1.311885487 | 0.044987185 |
| NLRC3      | -1.312187496 | 0.0305164   |
| AC015971.1 | -1.312275893 | 5.83E-05    |
| WDFY2      | -1.322686245 | 9.22291E-04 |
| SORL1      | -1.325133334 | 0.001557962 |
| AGAP2      | -1.327757545 | 0.005388802 |
| RASGRP2    | -1.330181074 | 3.83857E-04 |
| GIMAP7     | -1.340570919 | 3.24291E-04 |
| RAB18      | -1.369695549 | 9.27613E-04 |
| THADA      | -1.372268557 | 0.034195629 |
| NDUFS2     | -1.378093374 | 0.005561547 |
| LINC01619  | -1.39024118  | 0.009768915 |
| LTA4H      | -1.390813084 | 3.49E-07    |
| LY9        | -1.395058724 | 0.020053231 |
| PCNT       | -1.39637381  | 1.18E-07    |
| MIR616     | -1.399008696 | 3.65061E-04 |
| RAB30      | -1.401256722 | 0.004711309 |
| AC008105.3 | -1.402267445 | 0.008795521 |
| TUBB       | -1.414120697 | 3.56E-05    |
| AP1M1      | -1.423089972 | 0.046249295 |
| MAP2K3     | -1.430752051 | 7.03E-07    |
| STMN1      | -1.432160303 | 0.006947295 |
| ZBTB41     | -1.432716607 | 0.047691348 |
| HSPH1      | -1.447780618 | 0.022684784 |
| SLC4A10    | -1.458332412 | 0.020137915 |
| BIN1       | -1.468489225 | 0.010176265 |
| VCL        | -1.471252536 | 0.04820469  |
| FUT8       | -1.472625758 | 0.046678726 |

|            |              |             |
|------------|--------------|-------------|
| BIN2       | -1.47393909  | 6.26328E-04 |
| OGDH       | -1.475114454 | 0.00072801  |
| ANK1       | -1.479116699 | 0.048995923 |
| NPIP11     | -1.480818332 | 0.021907533 |
| SNHG15     | -1.481267741 | 5.83E-09    |
| TUBA4A     | -1.486218846 | 4.76158E-04 |
| CU639417.2 | -1.504492946 | 0.031018226 |
| PSMG3      | -1.507564672 | 0.028429602 |
| MAST3      | -1.516573038 | 0.035590314 |
| MAP3K4     | -1.516602402 | 0.02515865  |
| ZNF22      | -1.518408117 | 0.002974036 |
| AC112491.1 | -1.522187956 | 0.037903368 |
| USP3-AS1   | -1.540900664 | 0.009354116 |
| DIP2A      | -1.541422765 | 8.92E-09    |
| TLE4       | -1.542332776 | 6.12E-10    |
| CNN2       | -1.549274806 | 0.006349755 |
| BCL9L      | -1.550804819 | 1.04E-06    |
| PITPNM1    | -1.557375037 | 0.002544075 |
| HIBCH      | -1.579483397 | 0.001253359 |
| RPS6P25    | -1.59050327  | 0.040707972 |
| RBL2       | -1.598634625 | 5.27E-07    |
| CTNNA1     | -1.59907069  | 0.004999463 |
| SH3BP2     | -1.609388362 | 0.002041651 |
| LINC00649  | -1.611102877 | 0.017613662 |
| NPM1P39    | -1.615221154 | 1.73949E-04 |
| NOSIP      | -1.615706225 | 0.00037664  |
| IL21R      | -1.617096307 | 6.10E-05    |
| ST6GAL1    | -1.620245791 | 0.010574414 |
| AIF1       | -1.620333282 | 2.51765E-04 |
| LDLR       | -1.624105062 | 0.008979503 |
| PPT1       | -1.627103811 | 0.001528616 |
| ADGRA3     | -1.635748673 | 0.002709826 |
| RASSF3     | -1.641294645 | 0.028185017 |
| MCM10      | -1.665104346 | 0.024873332 |
| RBM38      | -1.668014901 | 1.05E-05    |
| ZNF273     | -1.670826156 | 0.038045397 |
| GIMAP4     | -1.672152906 | 0.007349886 |
| HNRNPA1L2  | -1.682096272 | 0.045371407 |
| CAPN2      | -1.702296873 | 3.08E-05    |

|          |              |             |
|----------|--------------|-------------|
| AXIN2    | -1.705430504 | 0.010149782 |
| USP3     | -1.712961867 | 4.42E-12    |
| MAGED1   | -1.71494716  | 0.013499718 |
| ZCCHC10  | -1.716699597 | 0.021177788 |
| MZF1-AS1 | -1.7172842   | 0.020947211 |
| TMEM63A  | -1.726499924 | 2.82E-08    |
| IKZF2    | -1.728151269 | 6.66E-10    |
| SKIL     | -1.728639276 | 4.35E-13    |
| SUSD4    | -1.761468238 | 1.62E-20    |
| TXK      | -1.761581987 | 3.92078E-04 |
| C16orf54 | -1.768396548 | 0.001459776 |
| HSPB1    | -1.782439566 | 0.001514536 |
| LYPD3    | -1.808136861 | 2.23E-10    |
| EPB41L2  | -1.808201648 | 0.001417549 |
| CDH23    | -1.809054651 | 0.001703358 |
| SLC16A10 | -1.815106441 | 0.005847269 |
| AQP3     | -1.817038939 | 0.001239152 |
| HIST1H4E | -1.821169875 | 0.041714496 |
| TBC1D10C | -1.834052532 | 0.032717256 |
| MYO1G    | -1.838880828 | 0.0017261   |
| APOL3    | -1.847206561 | 1.72E-08    |
| RNVU1-19 | -1.869098842 | 0.001784906 |
| CCM2     | -1.87728473  | 0.020520576 |
| KLRG1    | -1.882382596 | 0.003733439 |
| HADH     | -1.897806315 | 0.001747766 |
| PLEC     | -1.906786713 | 2.04E-08    |
| CCDC146  | -1.912331629 | 0.009978795 |
| LYRM4    | -1.915984537 | 0.002769011 |
| TM7SF2   | -1.918334394 | 0.023271147 |
| ZNF496   | -1.926333703 | 1.06989E-04 |
| APOBEC3G | -1.928581919 | 0.009045978 |
| RASD1    | -1.937639204 | 0.013526516 |
| ABHD3    | -1.942819938 | 0.00985195  |
| NNAT     | -1.951812536 | 0.001591791 |
| SEC14L1  | -1.961430627 | 2.55E-19    |
| CDC25B   | -1.96490278  | 6.13E-08    |
| DNAJB1   | -1.983200013 | 8.65062E-04 |
| CCDC125  | -1.998876456 | 0.011617003 |
| CCDC34   | -2.005985655 | 0.025450848 |

|                |              |             |
|----------------|--------------|-------------|
| SAMD3          | -2.006197077 | 0.00410829  |
| METTL23        | -2.006705842 | 8.07769E-04 |
| TNFSF9         | -2.028397867 | 0.040259907 |
| C18orf32       | -2.031753283 | 0.018638839 |
| S100A4         | -2.039585153 | 2.20E-07    |
| LIAS           | -2.043629446 | 1.24303E-04 |
| ATP8B2         | -2.044684204 | 0.033560213 |
| EGR3           | -2.061199153 | 0.041114253 |
| A2M            | -2.066901916 | 0.005639386 |
| EPOP           | -2.068600135 | 0.023157373 |
| CASC15         | -2.076012282 | 0.032389446 |
| NFKBID         | -2.093310668 | 0.010336476 |
| TENM1          | -2.095910159 | 2.13E-09    |
| LFNG           | -2.098924145 | 0.046206737 |
| C12orf75       | -2.10039619  | 0.040982509 |
| TPST2          | -2.106396213 | 0.035199958 |
| EPHA4          | -2.119304122 | 1.12E-06    |
| AC131212.2     | -2.127647443 | 0.049549313 |
| ITGA6          | -2.151057386 | 4.15361E-04 |
| ANKRD18EP      | -2.159176506 | 0.003929486 |
| MFGE8          | -2.167004249 | 3.86E-08    |
| RRNAD1         | -2.175573465 | 0.018552587 |
| RASGEF1B       | -2.181507145 | 0.001253359 |
| ADCY7          | -2.193990235 | 0.020128291 |
| ESPL1          | -2.195674883 | 0.023365383 |
| ETFRF1         | -2.208603581 | 0.009964285 |
| EPHX1          | -2.238994308 | 0.020545478 |
| CORO2A         | -2.246874335 | 0.01063676  |
| PLCG1          | -2.265986924 | 6.76E-06    |
| PXN            | -2.274114934 | 3.60E-15    |
| AC132192.2     | -2.313199152 | 0.027959084 |
| TOB1           | -2.324779106 | 1.23E-14    |
| MVB12B         | -2.325455268 | 3.92E-05    |
| PCED1B-<br>AS1 | -2.329910108 | 2.31E-07    |
| ORC1           | -2.33604032  | 0.026028817 |
| CCRL2          | -2.350400255 | 0.002110782 |
| SEC14L2        | -2.351036446 | 9.07074E-04 |
| S1PR1          | -2.362298185 | 2.09E-10    |

|            |              |             |
|------------|--------------|-------------|
| ZNF815P    | -2.364903691 | 0.032878577 |
| GAL3ST4    | -2.375927121 | 0.028106448 |
| EFHC1      | -2.384652334 | 0.016333993 |
| SOX6       | -2.384859973 | 0.009246993 |
| CTNND1     | -2.391825133 | 0.023855174 |
| IQSEC1     | -2.404209449 | 4.91E-18    |
| HSD17B10   | -2.412099367 | 0.00035383  |
| CLDN15     | -2.417387207 | 0.004773213 |
| TLR5       | -2.426574536 | 0.003425143 |
| HSPA1A     | -2.427073659 | 0.026711635 |
| LEF1       | -2.443523549 | 2.54E-06    |
| MYOM2      | -2.447840939 | 0.042865278 |
| AC004847.1 | -2.456685891 | 0.007455848 |
| NREP       | -2.472893164 | 0.02947269  |
| ABCC4      | -2.52920232  | 0.002769251 |
| NUCB2      | -2.554921005 | 5.59727E-04 |
| TRABD2A    | -2.564828822 | 0.017342458 |
| RNU6-790P  | -2.568433986 | 0.027101561 |
| NBPF9      | -2.569084907 | 4.59E-05    |
| NDRG4      | -2.575456167 | 0.032725021 |
| AP4S1      | -2.593540245 | 2.31E-07    |
| ZC3H12B    | -2.607147132 | 0.03498508  |
| GRASP      | -2.611156867 | 1.12E-05    |
| GZMK       | -2.612171508 | 1.35E-05    |
| TAPT1-AS1  | -2.6124154   | 0.008882297 |
| CD248      | -2.620146327 | 0.009737966 |
| DHX58      | -2.65770817  | 0.008368901 |
| TRAJ2      | -2.664805764 | 0.021907533 |
| MHENCR     | -2.667430884 | 0.02757122  |
| DPEP2      | -2.691784208 | 0.004219495 |
| LRRC8C     | -2.705015697 | 2.83E-09    |
| TRBV7-9    | -2.705868657 | 0.005021011 |
| FAM169A    | -2.712517599 | 1.02178E-04 |
| RARA       | -2.712801148 | 4.18E-06    |
| TRBV9      | -2.72280551  | 5.99E-13    |
| CEMIP      | -2.734866848 | 0.009959911 |
| GAA        | -2.75628043  | 0.021310154 |
| ENC1       | -2.786827984 | 4.82E-05    |
| SYTL1      | -2.834337835 | 1.19E-05    |

|            |              |             |
|------------|--------------|-------------|
| ZRANB3     | -2.837455465 | 0.049265389 |
| AC022916.1 | -2.845405722 | 0.004418532 |
| MYH3       | -2.853609322 | 0.004353586 |
| SWSAP1     | -2.888575983 | 0.012500933 |
| FBXO4      | -2.902564513 | 0.001290639 |
| TOP2A      | -2.90908368  | 6.92E-08    |
| AC020916.1 | -2.914025921 | 1.42E-09    |
| MCM2       | -2.927765427 | 5.28E-06    |
| TLE1       | -2.938752978 | 1.04305E-04 |
| AEBP1      | -2.995400695 | 0.002161594 |
| ZHX3       | -2.995869895 | 7.83686E-04 |
| IGSF9B     | -3.003445    | 1.40E-08    |
| AC005070.3 | -3.008297253 | 0.007726846 |
| ROBO1      | -3.103809461 | 0.001166408 |
| DEPDC7     | -3.105331757 | 0.001417549 |
| KIAA1328   | -3.10653494  | 0.012993501 |
| Z82206.1   | -3.113129479 | 0.020520576 |
| ALDH16A1   | -3.115300538 | 3.34E-07    |
| AC022239.2 | -3.116373113 | 0.00752584  |
| C20orf27   | -3.127617529 | 0.002041651 |
| NELL2      | -3.149685887 | 1.60226E-04 |
| TUBB2A     | -3.156152729 | 4.83E-15    |
| LST1       | -3.190950776 | 5.67E-07    |
| CTTNBP2NL  | -3.192253969 | 0.032389446 |
| RAD54B     | -3.210469394 | 0.021778111 |
| A2M-AS1    | -3.212885031 | 7.19E-05    |
| DCHS1      | -3.22636025  | 2.91883E-04 |
| TBC1D24    | -3.240190684 | 0.015431885 |
| AREG       | -3.247531714 | 0.004722628 |
| GALNT12    | -3.261066355 | 0.032596862 |
| LTBP4      | -3.275760613 | 8.90917E-04 |
| ENPP1      | -3.28694603  | 0.022758198 |
| RMI2       | -3.354411879 | 0.043484839 |
| PRKAR1B    | -3.374929764 | 1.42375E-04 |
| KCTD12     | -3.380863427 | 0.010705667 |
| NAPA-AS1   | -3.411373864 | 0.00900041  |
| DBN1       | -3.439125606 | 0.003079012 |
| SNX30      | -3.450700466 | 9.16E-05    |
| UBXN8      | -3.460922117 | 0.006976169 |



|                |              |             |
|----------------|--------------|-------------|
| EOMES          | -3.468251691 | 0.022851646 |
| CHEK2          | -3.504029748 | 0.014602903 |
| MUM1           | -3.505226335 | 7.40447E-04 |
| CDCA7L         | -3.50908957  | 1.60226E-04 |
| ZBTB46         | -3.521115313 | 0.006288875 |
| GATB           | -3.537951472 | 0.004326479 |
| EPHB6          | -3.542632594 | 0.001932993 |
| PLCB4          | -3.561708772 | 0.035489516 |
| AC011498.7     | -3.597162035 | 0.03386567  |
| QRSL1P3        | -3.612372628 | 0.005699098 |
| AL591895.1     | -3.683762268 | 1.20E-09    |
| AC116407.2     | -3.692188453 | 3.65061E-04 |
| FLT3LG         | -3.72776577  | 0.0048542   |
| DBP            | -3.738866805 | 3.85266E-04 |
| ACTN1          | -3.739300951 | 0.005561547 |
| TMEM9          | -3.742843943 | 0.013866681 |
| SCART1         | -3.775326071 | 2.88E-05    |
| CAPN5          | -3.824309907 | 9.04085E-04 |
| SERPINE1       | -3.836445196 | 0.001535774 |
| IL21R-AS1      | -3.854818941 | 0.004207018 |
| PFKFB2         | -3.906583607 | 4.96E-13    |
| CRTAM          | -3.926739014 | 1.05061E-04 |
| AC105046.1     | -3.944649792 | 2.35772E-04 |
| ARHGEF40       | -3.98398823  | 0.031291195 |
| COL6A3         | -4.016012499 | 0.031451768 |
| AC006449.6     | -4.022475915 | 0.013809816 |
| KLF2           | -4.054853615 | 1.79496E-04 |
| GCA            | -4.073837193 | 0.003116153 |
| SAMD12         | -4.109056611 | 0.022324017 |
| VPS9D1-<br>AS1 | -4.178266475 | 0.002183919 |
| RNU6-94P       | -4.184256854 | 0.040726232 |
| AL031846.1     | -4.2101089   | 0.028286987 |
| FLT1           | -4.29838274  | 4.91E-18    |
| AC116552.1     | -4.320418604 | 0.015424678 |
| SGIP1          | -4.43023322  | 0.008844203 |
| YBX3           | -4.513975734 | 3.25E-43    |
| DPPA4          | -4.577061993 | 2.25975E-04 |
| AC137932.2     | -4.583503772 | 0.022732199 |

|                 |              |             |
|-----------------|--------------|-------------|
| BLK             | -4.586977623 | 0.001177638 |
| MIR4697HG       | -4.588024217 | 1.05563E-04 |
| GRK3            | -4.612923765 | 2.25375E-04 |
| IL23R           | -4.613185116 | 3.91E-06    |
| KLRA1P          | -4.640764265 | 2.58E-05    |
| AC027449.1      | -4.674174513 | 0.014381859 |
| AL355581.1      | -4.808370069 | 6.53E-05    |
| EGFL8           | -4.809501967 | 0.002240947 |
| AP002360.2      | -4.849758911 | 0.01850536  |
| AC080112.4      | -4.958332815 | 7.19E-05    |
| TRBV6-4         | -4.98341653  | 0.004723627 |
| AC012146.1      | -5.029466164 | 0.001442124 |
| UACA            | -5.046737462 | 0.006424968 |
| RNU6-1043P      | -5.048843963 | 5.71038E-04 |
| FAM57A          | -5.057005632 | 0.02904921  |
| CCL3L3          | -5.1310113   | 0.002148492 |
| KLRC4-<br>KLRK1 | -5.155098893 | 0.002148492 |
| CCR7            | -5.186539819 | 2.91E-15    |
| EPS8            | -5.219281415 | 9.91363E-04 |
| MEX3A           | -5.241267244 | 0.005561547 |
| ARRDC5          | -5.307091289 | 0.025179362 |
| FAM174B         | -5.318094881 | 1.16733E-04 |
| LEF1-AS1        | -5.351419765 | 6.68E-07    |
| COL6A2          | -5.436250169 | 2.28E-16    |
| PDE3A           | -5.573696684 | 0.033508069 |
| IQSEC3          | -5.789140847 | 9.27613E-04 |
| FSD1            | -5.894428776 | 2.23E-06    |
| CYP2E1          | -6.010347379 | 0.001604957 |
| SBK1            | -6.042240409 | 1.11E-05    |
| SEMA4A          | -6.05137694  | 0.002727709 |
| JAKMIP2         | -6.107670472 | 1.24129E-04 |
| EFNA1           | -6.179918855 | 1.19E-05    |
| TNFRSF21        | -6.231404844 | 9.92E-18    |
| PTPRS           | -6.254034701 | 0.016818901 |
| ELOVL4          | -6.290418467 | 2.77E-05    |
| FSCN3           | -6.404411509 | 0.001253359 |
| KLRK1           | -6.486416385 | 4.02E-07    |
| C7orf31         | -6.675050788 | 7.55373E-04 |

|            |              |             |
|------------|--------------|-------------|
| MAP2K6     | -6.794375432 | 1.46E-05    |
| S100B      | -6.852041938 | 6.95E-13    |
| MRC2       | -6.93333747  | 2.56E-14    |
| S1PR5      | -6.949086613 | 4.33E-07    |
| NBEA       | -7.091773814 | 4.76158E-04 |
| EPHB3      | -7.099084632 | 9.11297E-04 |
| AC022075.1 | -7.132198338 | 1.12014E-04 |
| AC022239.3 | -7.212173565 | 1.42E-09    |
| FGR        | -7.239666023 | 0.006758301 |
| AL138689.1 | -7.427880218 | 4.71E-06    |
| IL11       | -7.435033286 | 5.36E-10    |
| SH3RF2     | -7.444926158 | 2.18405E-04 |
| N4BP3      | -7.509590725 | 8.04E-09    |
| CD8B       | -7.515089335 | 7.17E-06    |
| PPP1R2P9   | -7.561748748 | 1.06E-05    |
| ANAPC1P1   | -7.720820358 | 2.74024E-04 |
| SLC23A3    | -7.928067157 | 7.06E-05    |
| SCRG1      | -8.051234759 | 1.18831E-04 |
| AC080038.3 | -8.094957596 | 0.001149904 |
| VCAM1      | -8.287131265 | 2.29E-07    |
| SELL       | -8.31095405  | 1.36E-29    |
| RAP1GAP2   | -8.384873212 | 2.33E-07    |
| BEND5      | -8.443830677 | 9.17E-08    |
| KCNQ3      | -8.50080766  | 1.68E-08    |
| MYCBPAP    | -8.524685637 | 2.00E-05    |
| LRP1       | -8.562300429 | 0.005423769 |
| PCSK4      | -8.56878381  | 1.61E-05    |
| AMOT       | -8.583012941 | 4.27167E-04 |
| EVA1C      | -8.603583416 | 1.03E-06    |
| SPACA9     | -8.627957196 | 7.79E-05    |
| ADGRA2     | -8.684164136 | 7.48E-07    |
| KCNJ12     | -8.724915418 | 4.55E-05    |
| CPXM1      | -8.820781555 | 5.27E-06    |
| ABCG2      | -8.92076333  | 5.01555E-04 |
| OR10G2     | -8.945508325 | 1.72E-05    |
| DAB1       | -9.274339175 | 2.00E-10    |
| PLK1       | -9.389035734 | 6.66E-10    |
| AC022239.4 | -9.426619507 | 6.92E-11    |
| VWCE       | -9.609801224 | 1.50E-10    |

|          |              |             |
|----------|--------------|-------------|
| WNT11    | -9.739984458 | 8.78E-17    |
| C11orf21 | -9.791822508 | 1.30E-20    |
| MEOX1    | -9.798028552 | 2.54E-11    |
| ITGAM    | -9.855358803 | 2.58E-18    |
| FBLN2    | -9.895469479 | 2.04E-06    |
| CPA5     | -10.11610716 | 0.004027474 |
| PRL      | -10.15077553 | 1.61E-06    |
|          |              |             |
|          |              |             |

Supplementary Table 3.  
DE genes in PLZF<sup>+</sup> CD4 T  
cells vs PLZF<sup>-</sup> CD4 T cells

| Gene        | Log2FC      | FDR         |
|-------------|-------------|-------------|
| LINC01229   | 11.05731919 | 1.79E-12    |
| HPGDS       | 10.90455916 | 1.18E-09    |
| SLC24A3     | 10.81358114 | 1.44E-06    |
| HLF         | 10.47219303 | 2.63E-08    |
| FSTL4       | 10.46364765 | 1.86E-07    |
| AC013460.1  | 9.725997443 | 9.50E-08    |
| CLEC7A      | 9.113193993 | 9.14E-10    |
| ALK         | 9.09415451  | 0.001244471 |
| LINC00271   | 8.998395845 | 2.16E-05    |
| RNF165      | 8.637605117 | 8.72E-15    |
| IL1RL1      | 8.590333696 | 1.03E-09    |
| FERMT2      | 8.559745087 | 5.48E-22    |
| CLEC12A     | 8.28336145  | 4.73E-07    |
| PPARG       | 8.164717253 | 2.36E-08    |
| PHEX        | 7.861263723 | 6.90E-06    |
| AC007278.1  | 7.557432289 | 1.34E-35    |
| PLXDC2      | 7.241518942 | 1.55E-13    |
| LIF         | 7.040804908 | 9.31E-29    |
| AATK        | 6.8106639   | 4.92377E-04 |
| AC131097.1  | 6.738390687 | 4.02768E-04 |
| MCM10       | 6.715909242 | 1.71E-09    |
| KIFC3       | 6.665448213 | 6.18E-06    |
| FAM181A-AS1 | 6.612987329 | 9.74891E-04 |
| SLC4A10     | 6.581140932 | 4.87E-33    |
| SKA1        | 6.575225095 | 1.66E-08    |
| MATN2       | 6.554012373 | 6.67E-08    |
| CLU         | 6.529841837 | 0.02668374  |
| SKA3        | 6.39805602  | 7.71E-05    |
| ADCY6       | 6.357528    | 1.28E-08    |
| HIST1H1A    | 6.336983985 | 0.00031833  |
| GZMB        | 6.30653733  | 0.003628732 |
| CPNE7       | 6.264543829 | 0.009505332 |
| COL24A1     | 6.234514177 | 0.013041643 |
| XPNPEP2     | 6.231572418 | 3.13599E-04 |
| MAFTRR      | 6.193783449 | 0.00339651  |

|            |             |             |
|------------|-------------|-------------|
| CCL25      | 6.171738195 | 3.73056E-04 |
| IL18RAP    | 6.005377187 | 4.87E-33    |
| LGALS3     | 5.963528241 | 4.07686E-04 |
| C17orf53   | 5.860138435 | 8.12522E-04 |
| TGFBI      | 5.850506923 | 6.67E-08    |
| DIAPH3     | 5.826680058 | 1.37E-06    |
| AURKB      | 5.768998119 | 0.00011596  |
| ENPP1      | 5.764008097 | 2.48E-05    |
| AL031736.2 | 5.709557643 | 4.02E-13    |
| MND1       | 5.666788524 | 5.19755E-04 |
| LINC00892  | 5.610420845 | 2.70E-06    |
| PRR5L      | 5.58128309  | 6.74E-05    |
| CREB3L3    | 5.433998466 | 0.022793132 |
| AL109613.1 | 5.432227973 | 0.04731046  |
| TNFRSF9    | 5.388301932 | 3.38E-08    |
| KIT        | 5.354314561 | 5.38E-18    |
| C10orf128  | 5.331309211 | 2.38E-07    |
| E2F2       | 5.313477885 | 6.56E-07    |
| AC007278.2 | 5.277207994 | 0.001428117 |
| GAL3ST2    | 5.268857019 | 5.59E-06    |
| WWC3-AS1   | 5.215813531 | 0.001779452 |
| NGFR       | 5.209147245 | 0.035513074 |
| XCL1       | 5.082218524 | 7.47E-11    |
| KLRB1      | 5.07681092  | 1.63E-40    |
| SCN3B      | 5.034363482 | 5.08E-06    |
| IL411      | 5.026553883 | 1.81E-08    |
| GUCY1A3    | 5.019997426 | 1.01E-05    |
| ASB2       | 4.921496898 | 2.80E-15    |
| FSD1L      | 4.92146507  | 0.020684075 |
| EGLN3      | 4.899664023 | 1.69E-06    |
| PTGS2      | 4.878489024 | 5.21E-06    |
| IRX3       | 4.745256133 | 0.002974895 |
| RNU6-1280P | 4.706175768 | 0.011670015 |
| CKAP2L     | 4.705210102 | 1.81E-05    |
| PIK3AP1    | 4.633968912 | 3.10E-05    |
| GAD1       | 4.618520213 | 5.13E-08    |
| ATP9A      | 4.616796096 | 4.27E-05    |
| ZNF319     | 4.560102814 | 0.002646053 |
| AL358933.1 | 4.464039978 | 0.005234633 |

|            |             |             |
|------------|-------------|-------------|
| NLRP3      | 4.420970525 | 2.86313E-04 |
| CDRT4      | 4.403287361 | 0.049244741 |
| ZBTB16     | 4.365921027 | 2.18E-11    |
| IL17RE     | 4.354898482 | 0.007025162 |
| RGS3       | 4.328105821 | 1.03949E-04 |
| HIST1H4C   | 4.315675427 | 0.002021692 |
| SCRN1      | 4.28528544  | 4.27E-05    |
| ZFYVE9     | 4.265055519 | 0.006848067 |
| AL136988.2 | 4.2589987   | 0.020639532 |
| CCDC168    | 4.246401852 | 0.021084679 |
| AC087286.2 | 4.228048074 | 0.021996139 |
| CCNA2      | 4.22128911  | 1.05E-05    |
| AP002518.2 | 4.193812232 | 0.016675337 |
| CENPW      | 4.177271342 | 1.55E-06    |
| SAMD4A     | 4.157981778 | 2.34087E-04 |
| LINC01871  | 4.154141171 | 1.38E-12    |
| MCOLN2     | 4.128749703 | 0.038763949 |
| KIFC1      | 4.126144102 | 1.90E-10    |
| MMRN1      | 4.057254931 | 0.013310412 |
| VCAN       | 4.055812367 | 0.027775575 |
| EFCAB8     | 3.991050766 | 7.55371E-04 |
| CAPG       | 3.976789477 | 1.60E-11    |
| TP53I11    | 3.975529475 | 9.38E-05    |
| SMOX       | 3.969654906 | 6.28E-07    |
| MAP3K8     | 3.944471768 | 2.00E-20    |
| SMIM4      | 3.943246536 | 0.003248816 |
| ZSWIM5     | 3.937462003 | 0.033678984 |
| ALOX12P2   | 3.91937386  | 0.036573875 |
| LINC00598  | 3.88819291  | 0.049336643 |
| DTX1       | 3.886459974 | 3.85E-14    |
| IL13       | 3.854099102 | 0.001277054 |
| FBXO10     | 3.823123955 | 0.001003112 |
| XCL2       | 3.799128896 | 2.23E-09    |
| IL18R1     | 3.794365351 | 8.53E-45    |
| CST7       | 3.788878856 | 4.28E-17    |
| NKG7       | 3.780314255 | 2.11E-11    |
| TTC7B      | 3.772581234 | 0.007008106 |
| FASLG      | 3.767844732 | 0.00036214  |
| RRM2       | 3.763170936 | 2.40E-05    |

|               |             |             |
|---------------|-------------|-------------|
| CFH           | 3.762817093 | 0.009947906 |
| PHF5CP        | 3.747000518 | 1.44899E-04 |
| MFSD2A        | 3.723508325 | 0.013194342 |
| TTC39C-AS1    | 3.694915865 | 0.004149032 |
| AC012467.2    | 3.679829506 | 0.003679452 |
| DUSP6         | 3.665469474 | 5.88E-07    |
| CHN2          | 3.640540946 | 1.43E-05    |
| DLL1          | 3.614258304 | 3.94E-24    |
| AC002306.1    | 3.611064986 | 0.005234633 |
| E2F8          | 3.595217898 | 0.007275339 |
| DTL           | 3.544473961 | 8.03203E-04 |
| B3GALT2       | 3.510151245 | 0.005170099 |
| COLQ          | 3.50387831  | 0.002728423 |
| TRPC3         | 3.479518773 | 0.020026039 |
| IFNG          | 3.474096904 | 3.97E-06    |
| EXO1          | 3.422144681 | 0.011529976 |
| P2RX5-TAX1BP3 | 3.408165575 | 0.017463346 |
| AL137186.1    | 3.404540589 | 6.62189E-04 |
| C1orf216      | 3.393749569 | 0.035958217 |
| TOGARAM2      | 3.389787223 | 1.82419E-04 |
| RUNX2         | 3.387591708 | 1.17E-08    |
| SLC6A20       | 3.35714815  | 3.38E-08    |
| DUSP5         | 3.343285006 | 3.63E-11    |
| ATP8B4        | 3.325961748 | 0.012982137 |
| C3AR1         | 3.322534168 | 0.001010851 |
| RPL23AP55     | 3.319917632 | 0.0124767   |
| GAB3          | 3.306517904 | 8.41E-09    |
| BUB1          | 3.30261254  | 0.016304314 |
| SPRY2         | 3.293460397 | 0.0381835   |
| DOCK5         | 3.268066104 | 1.59E-14    |
| MBOAT2        | 3.265305779 | 8.90E-05    |
| TROAP         | 3.262406601 | 0.03329217  |
| PDCD1         | 3.258678204 | 6.25E-06    |
| FAH           | 3.226832622 | 4.29181E-04 |
| ZEB2          | 3.219790015 | 1.03E-05    |
| NUF2          | 3.213826372 | 0.005853273 |
| DUSP4         | 3.212593392 | 1.02E-10    |
| NCAPH         | 3.170110539 | 0.027420645 |
| TNFSF14       | 3.144719237 | 1.07E-15    |



|             |             |             |
|-------------|-------------|-------------|
| SNX18       | 3.109226851 | 6.80E-05    |
| BIRC5       | 3.094416625 | 0.006466351 |
| B3GNT5      | 3.094037124 | 2.05E-06    |
| MCOLN3      | 3.092730226 | 8.45902E-04 |
| WDR76       | 3.083023721 | 0.004377859 |
| HOTAIRM1    | 3.081178884 | 0.019223527 |
| CSF1        | 3.066136185 | 1.04E-05    |
| NEURL1      | 3.004479915 | 0.029360674 |
| HIST1H2BH   | 2.96230299  | 7.09781E-04 |
| IRAK2       | 2.936982543 | 7.50E-06    |
| PALLD       | 2.928489099 | 2.52E-09    |
| PXMP2       | 2.922534907 | 0.029003465 |
| YWHAH       | 2.922497673 | 2.16E-09    |
| MYBL2       | 2.907916957 | 0.01668567  |
| FAM53B      | 2.89735015  | 4.39041E-04 |
| CCNI2       | 2.889765227 | 0.028091808 |
| MIR4435-2HG | 2.88350824  | 0.020484749 |
| MMP9        | 2.876660884 | 0.014899929 |
| TMEM107     | 2.87635331  | 0.003248816 |
| GPR34       | 2.857346921 | 0.024229319 |
| AC092139.1  | 2.85622207  | 0.019223527 |
| IRF8        | 2.838068061 | 9.52E-06    |
| C2orf66     | 2.828690261 | 0.008963127 |
| CD160       | 2.816775161 | 0.005396678 |
| TMPPE       | 2.776792339 | 4.06E-05    |
| IL2         | 2.773988315 | 1.63E-05    |
| AC064801.2  | 2.760622869 | 9.81E-06    |
| CENPUP2     | 2.758552588 | 0.005037604 |
| AL390208.1  | 2.750205915 | 0.003012627 |
| GZMK        | 2.745551988 | 2.42E-05    |
| NLRP6       | 2.744832445 | 1.34E-08    |
| PHLDB1      | 2.726132792 | 0.046604063 |
| FAM111B     | 2.717343573 | 0.037601076 |
| ARHGAP18    | 2.699653136 | 4.98E-05    |
| ASPM        | 2.697401345 | 1.71059E-04 |
| ANK1        | 2.695615755 | 4.05E-05    |
| LINC01534   | 2.674031422 | 0.049936043 |
| IFNGR1      | 2.670951059 | 1.74E-10    |
| CRIM1       | 2.641932195 | 1.19E-32    |

|            |             |             |
|------------|-------------|-------------|
| AL355802.3 | 2.640985868 | 0.004736431 |
| COX6CP1    | 2.634689208 | 0.02434592  |
| AC067931.1 | 2.614159204 | 0.030153075 |
| TEX29      | 2.575550042 | 7.50E-05    |
| HIST3H2A   | 2.573158819 | 0.044677332 |
| CDK6       | 2.560738801 | 1.48862E-04 |
| RIPOR3     | 2.557703113 | 0.025327145 |
| BCL2A1     | 2.544615267 | 2.33E-13    |
| LRP1B      | 2.540930538 | 4.77078E-04 |
| PLCXD2     | 2.536035657 | 1.61E-06    |
| ZFP30      | 2.529458566 | 2.44E-10    |
| HOXB3      | 2.503976752 | 5.02E-05    |
| CACNA2D4   | 2.491344905 | 0.003892706 |
| RORA-AS1   | 2.478860348 | 0.041816603 |
| NFIL3      | 2.472325023 | 0.005902333 |
| MAF        | 2.463672375 | 9.92E-08    |
| GAB2       | 2.463105625 | 5.04E-32    |
| P2RY14     | 2.457912062 | 3.40E-07    |
| FES        | 2.441756427 | 0.002084617 |
| OTUD7B     | 2.422114155 | 7.96E-08    |
| HIRA       | 2.409548102 | 0.02650885  |
| ADAM19     | 2.407007194 | 6.00E-13    |
| CDC6       | 2.401140192 | 0.00155075  |
| MID1IP1    | 2.378127935 | 0.001351606 |
| ACTN4      | 2.366359661 | 1.30E-17    |
| RALB       | 2.363240085 | 0.001174964 |
| GYG1       | 2.356151739 | 2.02E-11    |
| B4GALT5    | 2.344569471 | 0.004888276 |
| ITM2C      | 2.32767427  | 0.001677211 |
| AC010326.3 | 2.326689231 | 0.042167593 |
| KNL1       | 2.326174822 | 5.95456E-04 |
| SCART1     | 2.319835763 | 0.042045762 |
| NRIP1      | 2.317392744 | 2.27E-11    |
| NPTX1      | 2.297794631 | 0.029456578 |
| SPART      | 2.294929899 | 0.016537549 |
| DHCR24     | 2.287203079 | 0.02240471  |
| CELF2-AS1  | 2.284956007 | 0.031084919 |
| AC115618.1 | 2.282553887 | 0.047705579 |
| CD40LG     | 2.280265164 | 3.68E-15    |

|            |             |             |
|------------|-------------|-------------|
| GRAMD1B    | 2.2580185   | 9.82E-09    |
| BIVM       | 2.244869437 | 0.008668012 |
| ESR2       | 2.242722726 | 0.001965314 |
| MYO1E      | 2.24253695  | 0.002403429 |
| AC015911.3 | 2.239966365 | 0.038466379 |
| U1         | 2.237008952 | 0.049856041 |
| AF127577.6 | 2.22895269  | 0.04548352  |
| KLHL29     | 2.225241951 | 2.33485E-04 |
| LZTFL1     | 2.186294695 | 1.12E-06    |
| E2F1       | 2.18266422  | 0.025220293 |
| PTTG1      | 2.167820328 | 7.30018E-04 |
| TMEM64     | 2.166737033 | 0.014050067 |
| SLC41A1    | 2.164477461 | 1.19806E-04 |
| PLA2G16    | 2.142495076 | 0.019177706 |
| S100A4     | 2.121805866 | 1.58E-06    |
| C17orf67   | 2.121025368 | 0.017361701 |
| RASGRF2    | 2.118504141 | 9.52E-12    |
| RCBTB2     | 2.114755526 | 0.027281279 |
| LPAR6      | 2.109037064 | 8.77658E-04 |
| DAPK1      | 2.09230542  | 0.008828946 |
| ATF3       | 2.092168864 | 0.010240062 |
| LINC00513  | 2.085009221 | 0.023851291 |
| SCUBE1     | 2.078093478 | 0.041213599 |
| CCR4       | 2.078019248 | 2.32E-07    |
| PRKCE      | 2.06210201  | 0.00046083  |
| SPAG5      | 2.058281483 | 1.04887E-04 |
| ID2        | 2.050933468 | 1.60E-11    |
| MPZL2      | 2.050433079 | 0.025222339 |
| CLSPN      | 2.049217237 | 0.042167593 |
| GSTP1      | 2.037243615 | 0.006367135 |
| TYMS       | 2.026373902 | 2.54E-07    |
| ARHGAP35   | 2.012992379 | 3.06E-06    |
| LY6E       | 2.012991181 | 2.58566E-04 |
| SLC1A4     | 2.009789943 | 2.76E-05    |
| PRR7       | 2.005517912 | 0.031292853 |
| IL12RB2    | 2.002393703 | 3.63788E-04 |
| SVIL-AS1   | 1.990540208 | 0.003146115 |
| ERN1       | 1.986159954 | 1.59E-05    |
| GLB1       | 1.984764785 | 1.80E-05    |

|            |             |             |
|------------|-------------|-------------|
| AC104447.1 | 1.966588235 | 0.003033212 |
| PBX4       | 1.96453625  | 1.77876E-04 |
| CPD        | 1.964129675 | 5.97E-13    |
| NPC1       | 1.954851779 | 1.47E-05    |
| PLXNC1     | 1.949621916 | 8.44E-07    |
| MXRA7      | 1.948387001 | 0.005512987 |
| SLC1A5     | 1.947952105 | 0.038763949 |
| CKS2       | 1.939983398 | 0.013310412 |
| GLO1       | 1.936130342 | 6.28E-07    |
| HDAC10     | 1.93415522  | 0.02434592  |
| TRGC1      | 1.918348408 | 5.11E-08    |
| AL136320.1 | 1.911961781 | 0.001129571 |
| SLC25A25   | 1.910458897 | 0.004981823 |
| LMO4       | 1.903991071 | 1.52E-05    |
| AC044781.1 | 1.899908992 | 0.042167593 |
| HCST       | 1.898392261 | 1.82805E-04 |
| NUSAP1     | 1.894436426 | 0.005212307 |
| ID3        | 1.870528268 | 0.018476472 |
| AL390719.1 | 1.859873269 | 0.007309302 |
| IRS2       | 1.852241764 | 1.34E-05    |
| AC091814.1 | 1.84671764  | 0.03263946  |
| RGS2       | 1.844945513 | 0.00590284  |
| CASZ1      | 1.840489853 | 4.67924E-04 |
| KIF11      | 1.835603782 | 0.014673472 |
| ARHGEF12   | 1.82357239  | 0.013386581 |
| HNRNPA3P6  | 1.822477444 | 0.018808713 |
| RAB11FIP1  | 1.811613223 | 0.004049983 |
| PLXND1     | 1.806876062 | 0.026796435 |
| PHC1P1     | 1.79760223  | 0.005838235 |
| PRMT9      | 1.788192992 | 2.14E-07    |
| AMPD2      | 1.786699171 | 3.49E-10    |
| GPR137B    | 1.772165889 | 0.046278703 |
| RAB8B      | 1.768812452 | 1.23E-09    |
| EGR2       | 1.766420532 | 0.002781665 |
| GMNN       | 1.764527554 | 8.79356E-04 |
| MFHAS1     | 1.755297824 | 0.001257489 |
| AC131097.4 | 1.75462988  | 0.045735115 |
| TRPV2      | 1.746220108 | 0.043344561 |
| TIAM1      | 1.745755384 | 0.001297752 |

|             |             |             |
|-------------|-------------|-------------|
| CCR9        | 1.745038102 | 0.001600916 |
| SLF1        | 1.734415209 | 0.012420425 |
| ZNF571-AS1  | 1.72892233  | 0.003783918 |
| NAMPTP1     | 1.728276195 | 0.022128576 |
| INSIG1      | 1.719676013 | 4.73E-07    |
| PHLDA1      | 1.718784082 | 0.02240471  |
| MEGF9       | 1.713037941 | 0.042270736 |
| MPZL3       | 1.68517059  | 2.03005E-04 |
| PGAP1       | 1.663795246 | 0.028362535 |
| KIAA0040    | 1.651319189 | 0.044646237 |
| BAK1        | 1.643089022 | 2.68E-05    |
| SPATS2L     | 1.640889421 | 0.026852753 |
| TOMM34      | 1.637453962 | 0.003033058 |
| RORA        | 1.636631322 | 1.69E-05    |
| TTC39C      | 1.63604219  | 1.31E-11    |
| NFAT5       | 1.635566007 | 1.35E-05    |
| SESN1       | 1.631793782 | 0.020639532 |
| KLHL17      | 1.625120838 | 0.037025662 |
| CRY1        | 1.623435585 | 3.85E-13    |
| CCL5        | 1.618495392 | 6.98253E-04 |
| SLC4A2      | 1.614566966 | 0.012281854 |
| TMED8       | 1.610403245 | 0.014999745 |
| ARL4A       | 1.609051225 | 0.005902333 |
| CXXC5       | 1.608238561 | 0.024824608 |
| PHACTR2-AS1 | 1.598811071 | 0.040776961 |
| TNFRSF1B    | 1.597757978 | 1.07E-10    |
| PDE4A       | 1.597499083 | 1.93097E-04 |
| ZNF552      | 1.591030643 | 6.04E-05    |
| TNF         | 1.589113116 | 0.020890105 |
| HIST1H2BK   | 1.585945663 | 1.32E-08    |
| FURIN       | 1.584798785 | 7.84E-05    |
| PIK3R1      | 1.571956406 | 3.67569E-04 |
| NAMPT       | 1.571620093 | 2.45659E-04 |
| TRGC2       | 1.566106671 | 6.16653E-04 |
| ERRF1       | 1.566001385 | 0.043312625 |
| HNRNPLL     | 1.558132109 | 4.60686E-04 |
| CELF2       | 1.552365651 | 1.61872E-04 |
| RPS6KA5     | 1.548926304 | 0.022972064 |
| ATXN7L2     | 1.539602951 | 0.027744659 |

|           |             |             |
|-----------|-------------|-------------|
| PRKAB1    | 1.536219478 | 0.002201265 |
| LINC00963 | 1.527730694 | 3.42E-07    |
| ARHGAP21  | 1.526523147 | 1.07318E-04 |
| TSC22D1   | 1.524960001 | 0.035396238 |
| ATP1B3    | 1.519320746 | 8.77432E-04 |
| PRKAB2    | 1.514643211 | 0.026746326 |
| SERPINB9  | 1.513639283 | 2.61E-06    |
| PLIN2     | 1.511244701 | 1.01E-05    |
| LAPTM4B   | 1.51074718  | 0.035396238 |
| TRGV10    | 1.506272052 | 2.85611E-04 |
| VSIR      | 1.494957389 | 0.003874334 |
| ORC6      | 1.49147227  | 0.024064159 |
| POLR2L    | 1.472767766 | 0.0239638   |
| UBE2Q2P1  | 1.472263869 | 0.043378011 |
| ZNF462    | 1.466822315 | 0.038601103 |
| KIF3B     | 1.459164464 | 0.002853663 |
| TESC      | 1.45355237  | 0.027231616 |
| NDRG1     | 1.45321875  | 1.57E-05    |
| PRC1      | 1.445832473 | 0.016946965 |
| ZNF571    | 1.435799356 | 0.007676839 |
| REPS1     | 1.433523869 | 3.57E-07    |
| PRKX      | 1.423729413 | 0.028091808 |
| WWC3      | 1.42135557  | 0.027775575 |
| DENND3    | 1.415741191 | 0.0381835   |
| ARNTL     | 1.412796623 | 0.00017011  |
| EBNA1BP2  | 1.406919921 | 1.89491E-04 |
| SSH1      | 1.404632377 | 1.08E-05    |
| GNA15     | 1.392178239 | 0.047375832 |
| IL32      | 1.37789157  | 0.023390166 |
| EPAS1     | 1.376821078 | 9.92E-05    |
| TRAF4     | 1.373846065 | 5.18E-05    |
| STOM      | 1.371342864 | 0.037542439 |
| HIST1H1C  | 1.368768602 | 1.93117E-04 |
| SFMBT1    | 1.351251102 | 0.04544674  |
| NR1D1     | 1.337739659 | 4.27E-05    |
| VRK1      | 1.334911949 | 0.014898055 |
| SRGN      | 1.334766677 | 2.25E-08    |
| CD63      | 1.33292643  | 0.011955367 |
| LRRFIP2   | 1.330558157 | 0.00203641  |

|          |             |             |
|----------|-------------|-------------|
| ZC3H12A  | 1.32685128  | 3.39623E-04 |
| RARRES3  | 1.319744271 | 2.22E-05    |
| GAPDH    | 1.31934899  | 6.46E-09    |
| ANXA11   | 1.316166221 | 1.31E-06    |
| ACAA2    | 1.308958783 | 0.007937582 |
| IL2RB    | 1.30297757  | 1.46E-06    |
| ZNF331   | 1.300846722 | 0.011137774 |
| MIR22HG  | 1.299038665 | 1.76E-05    |
| HSPD1    | 1.295470347 | 1.39428E-04 |
| CCDC69   | 1.285703874 | 0.049839407 |
| PITPNA   | 1.283237337 | 0.023390166 |
| REL      | 1.28189003  | 0.009268449 |
| GFOD1    | 1.276490868 | 0.029360674 |
| C15orf39 | 1.273750392 | 3.33269E-04 |
| STK24    | 1.269583565 | 1.99E-05    |
| TRAF6    | 1.268456436 | 0.007010542 |
| FADS3    | 1.268125574 | 0.009041148 |
| LRIG1    | 1.266794912 | 0.004227078 |
| ZBTB39   | 1.2661172   | 0.048829022 |
| WEE1     | 1.265899033 | 0.001832888 |
| MGAT4B   | 1.260449196 | 0.035958217 |
| GALNT3   | 1.256609509 | 0.025222339 |
| AHR      | 1.2527915   | 0.014673472 |
| ISG15    | 1.252337875 | 0.018808713 |
| JAK2     | 1.246547284 | 0.009469268 |
| SLC7A5   | 1.245932503 | 0.00774738  |
| H2AFX    | 1.244215194 | 0.025362166 |
| TRAT1    | 1.243202861 | 0.001932887 |
| MYO1F    | 1.242997906 | 0.034247363 |
| ZCCHC2   | 1.225802413 | 1.48E-05    |
| DNAJC1   | 1.223458584 | 0.039401616 |
| PARP14   | 1.218289939 | 0.024812326 |
| ITGAE    | 1.215351934 | 0.008862705 |
| SMS      | 1.212981543 | 0.001112354 |
| DNAJC25  | 1.211932158 | 0.026215687 |
| GNAI3    | 1.208875018 | 1.05306E-04 |
| RHEB     | 1.204134391 | 0.019025164 |
| CLDND1   | 1.20156245  | 0.001097933 |
| ALDOA    | 1.193385699 | 2.05E-06    |

|          |             |             |
|----------|-------------|-------------|
| SELENOT  | 1.192830344 | 0.001928383 |
| C18orf8  | 1.186420346 | 9.21E-06    |
| DCTD     | 1.183102139 | 0.009947906 |
| CCNH     | 1.173522909 | 0.025375155 |
| NR4A3    | 1.167851016 | 0.024419393 |
| UBC      | 1.162976437 | 4.18E-07    |
| AMZ2     | 1.161243033 | 0.003183449 |
| DYNLT3   | 1.158711517 | 0.003213599 |
| B4GALT1  | 1.156149453 | 2.97E-13    |
| PTPN22   | 1.155982382 | 2.05085E-04 |
| ZMIZ1    | 1.151058179 | 5.75E-05    |
| SEC24D   | 1.149121729 | 0.005744698 |
| ARAP2    | 1.148876122 | 0.019154926 |
| MAN2A2   | 1.138779014 | 0.003496982 |
| CMTM6    | 1.138352831 | 0.006029949 |
| SDF4     | 1.137306636 | 0.02922908  |
| TMEM2    | 1.132975299 | 2.20E-07    |
| ARHGDI A | 1.132056097 | 0.00314121  |
| FOXO3    | 1.130434908 | 0.034154454 |
| CXCR3    | 1.129524944 | 0.029916225 |
| CD59     | 1.125471545 | 0.015863849 |
| SMAD3    | 1.124898276 | 0.041474744 |
| SERINC5  | 1.119138039 | 0.004021682 |
| GATAD2A  | 1.118242261 | 0.00304873  |
| PPP1R16B | 1.118157733 | 1.67E-08    |
| LPAR2    | 1.1160427   | 0.013940063 |
| EAF1     | 1.112045858 | 0.036629704 |
| C19orf60 | 1.110575376 | 0.017361701 |
| GDE1     | 1.108046668 | 0.016304314 |
| SYNE2    | 1.102789775 | 0.001089673 |
| ARHGEF7  | 1.10247934  | 3.40E-08    |
| TSPYL2   | 1.101823264 | 0.003277779 |
| SLC6A6   | 1.095259789 | 0.018427544 |
| PRDX1    | 1.09481395  | 0.002433683 |
| TGFB1    | 1.091946019 | 0.008652247 |
| UBE2F    | 1.091441285 | 0.006367135 |
| BTBD9    | 1.089953076 | 0.015295274 |
| SELENOW  | 1.08769165  | 0.029916225 |
| TIPARP   | 1.086129828 | 3.33195E-04 |



|          |             |             |
|----------|-------------|-------------|
| TAGAP    | 1.081726403 | 0.004823188 |
| EPSTI1   | 1.081290205 | 0.029584566 |
| PRDX6    | 1.081145633 | 0.008246723 |
| NCOA7    | 1.079871311 | 1.45988E-04 |
| PFKFB3   | 1.079119934 | 1.24E-05    |
| FNBP1    | 1.077675575 | 1.87E-06    |
| HSPE1    | 1.077673713 | 0.013371251 |
| CREM     | 1.076832254 | 3.17138E-04 |
| PHACTR2  | 1.075647526 | 0.007939337 |
| HDLBP    | 1.07559142  | 1.00E-05    |
| PGGHG    | 1.074188753 | 0.010962851 |
| GRK5     | 1.071309111 | 2.44E-11    |
| SPRY1    | 1.066234985 | 0.010181077 |
| TRIM39   | 1.062875035 | 0.043397663 |
| FGFR1OP2 | 1.060581246 | 2.11854E-04 |
| RNF19A   | 1.060308314 | 0.007010542 |
| SUN2     | 1.059426529 | 0.002047737 |
| KCTD9    | 1.05772571  | 0.036108174 |
| DAGLB    | 1.049584551 | 0.034892601 |
| CASP7    | 1.04806256  | 0.023185624 |
| SSBP3    | 1.047577307 | 0.022236101 |
| TMEM9B   | 1.040262435 | 0.00089946  |
| PELO     | 1.037982287 | 0.02434592  |
| DPP4     | 1.033923111 | 0.009684626 |
| HMGB2    | 1.033115844 | 6.82916E-04 |
| CNOT2    | 1.028129621 | 0.020829652 |
| IFITM3   | 1.025348652 | 0.005480943 |
| PDCL3    | 1.020613258 | 0.006562535 |
| DDX24    | 1.019180352 | 2.92E-05    |
| IFITM2   | 1.019006019 | 0.014025866 |
| FLNA     | 1.018537222 | 0.019437756 |
| CYB5R3   | 1.013467879 | 0.003216091 |
| EPG5     | 1.007846998 | 0.009505332 |
| PREX1    | 1.002058869 | 0.001078319 |
| PSMD12   | 1.000829781 | 0.006523927 |
| GATA3    | 0.99746546  | 0.008566015 |
| CDK9     | 0.986964526 | 0.015692621 |
| TNIP1    | 0.986045738 | 0.022681083 |
| OPTN     | 0.981324672 | 1.83E-05    |

|            |             |             |
|------------|-------------|-------------|
| XPNPEP1    | 0.976340714 | 0.003669164 |
| CTSC       | 0.973860995 | 0.030033786 |
| LRMP       | 0.973436934 | 0.007647449 |
| AC023510.2 | 0.971792338 | 0.029584566 |
| ATP2B4     | 0.96908751  | 0.031932551 |
| TESK1      | 0.967203223 | 0.005001989 |
| SH2D2A     | 0.964655858 | 0.009711927 |
| TOR1B      | 0.960351026 | 0.020454839 |
| CITED2     | 0.959264599 | 0.013141497 |
| MYO5A      | 0.958304831 | 0.003607767 |
| SLC9A3R1   | 0.955640004 | 0.032651941 |
| PIP4K2A    | 0.954392902 | 0.041101249 |
| GNG2       | 0.952314543 | 8.43025E-04 |
| UBE2K      | 0.948050601 | 2.11E-05    |
| ITPR3      | 0.947375268 | 5.24262E-04 |
| PRKAR1A    | 0.946163071 | 8.80234E-04 |
| CHMP4B     | 0.944947744 | 3.83E-06    |
| HMGCR      | 0.942586247 | 0.043378011 |
| EZR        | 0.94098151  | 0.00353697  |
| RAB5B      | 0.939984901 | 0.035262123 |
| CD226      | 0.938805533 | 0.029303806 |
| BCL2L11    | 0.937662339 | 0.031098096 |
| AUTS2      | 0.932431303 | 2.00215E-04 |
| NIP7       | 0.923256529 | 0.043449692 |
| KLHL18     | 0.917499582 | 0.033014506 |
| TACC1      | 0.915022623 | 0.004557466 |
| MSN        | 0.912989771 | 5.09E-05    |
| COTL1      | 0.90558794  | 0.010103061 |
| SLC3A2     | 0.904868619 | 2.18E-08    |
| RANBP2     | 0.899649224 | 0.002748324 |
| MAFG       | 0.883301416 | 0.010375523 |
| MYH9       | 0.882974036 | 5.43E-05    |
| PRKD3      | 0.882225906 | 0.041219868 |
| STK10      | 0.869580808 | 0.012645281 |
| IDS        | 0.865262587 | 0.014992216 |
| SP140      | 0.864054807 | 4.09559E-04 |
| PMAIP1     | 0.856056526 | 0.025029336 |
| GNA13      | 0.854363064 | 3.41E-05    |
| P2RY8      | 0.851678942 | 0.011955367 |

|          |             |             |
|----------|-------------|-------------|
| PCNX1    | 0.843931821 | 0.016257852 |
| LAPTM4A  | 0.842567342 | 0.015967592 |
| TUBB4B   | 0.84127948  | 0.030743587 |
| CYB5B    | 0.84013513  | 0.037688024 |
| SH3BGRL3 | 0.839996685 | 0.005089748 |
| SEC61B   | 0.838595834 | 0.003669445 |
| HNRNPA0  | 0.837662449 | 0.001244471 |
| SYNGAP1  | 0.834799285 | 0.010158055 |
| APMAP    | 0.832334891 | 0.003954397 |
| LCP1     | 0.831612756 | 3.39623E-04 |
| RCOR1    | 0.822979098 | 0.029985966 |
| G3BP2    | 0.816036143 | 0.007010542 |
| HSPA5    | 0.815525048 | 0.030035605 |
| PLEKHG2  | 0.814505539 | 0.028362535 |
| UBE2L6   | 0.814472972 | 0.003977598 |
| CLIP4    | 0.813885328 | 0.02668374  |
| SURF4    | 0.811492703 | 0.011538684 |
| JMJD6    | 0.809110858 | 0.006466351 |
| MCM4     | 0.805925384 | 0.041428171 |
| ETF1     | 0.803750716 | 2.17E-05    |
| IFITM1   | 0.801828355 | 0.048929323 |
| SMURF2   | 0.801021632 | 0.001112809 |
| DENND5A  | 0.798737028 | 0.019818135 |
| C18orf25 | 0.797449424 | 0.030817514 |
| UBB      | 0.796401437 | 0.002329786 |
| FOSL2    | 0.795623121 | 0.003183449 |
| IMP4     | 0.788490543 | 0.006611015 |
| TUBA1C   | 0.786522428 | 0.003802191 |
| RAC2     | 0.785875831 | 0.018808713 |
| NCOR2    | 0.785067735 | 0.036870883 |
| DYNLL2   | 0.77323042  | 0.04393734  |
| GNAI2    | 0.770770914 | 0.001487847 |
| COQ10B   | 0.767271639 | 0.008192105 |
| RAB1B    | 0.760573172 | 0.036245565 |
| PDIA6    | 0.758194454 | 0.026986395 |
| PTP4A2   | 0.754097042 | 0.006011216 |
| PARP8    | 0.744197732 | 0.006468737 |
| SRRT     | 0.744038228 | 0.023982564 |
| FOXO1    | 0.743458231 | 0.034591077 |

|          |             |             |
|----------|-------------|-------------|
| COX5A    | 0.741864266 | 0.030035961 |
| ICOS     | 0.737052825 | 0.033852156 |
| HM13     | 0.732937339 | 0.024812326 |
| NFKBIZ   | 0.729145993 | 0.030218758 |
| ARL4C    | 0.721070959 | 0.027409113 |
| AKAP13   | 0.720498175 | 0.016008368 |
| HELZ     | 0.719281393 | 1.61662E-04 |
| MGRN1    | 0.717320662 | 0.010183696 |
| LYAR     | 0.716677441 | 0.042167593 |
| GLIPR1   | 0.707517065 | 0.01742273  |
| NFATC2   | 0.696289336 | 0.011538684 |
| PPP1R15A | 0.685137316 | 0.017353301 |
| VCP      | 0.681528717 | 0.017361701 |
| FUBP1    | 0.679782271 | 0.022816359 |
| PDIA3    | 0.679504474 | 0.028648651 |
| HTATSF1  | 0.675666094 | 0.001601343 |
| HNRNPUL1 | 0.671800182 | 4.27679E-04 |
| CDKN1B   | 0.670692333 | 0.035913576 |
| KIF5B    | 0.670110724 | 0.001170854 |
| ARFGAP3  | 0.65872806  | 0.018808713 |
| STAM     | 0.650131988 | 0.002925357 |
| HSPA9    | 0.645233809 | 0.027775575 |
| EPRS     | 0.645179974 | 0.001799786 |
| PFN1     | 0.643745818 | 0.031763202 |
| ACTB     | 0.643506623 | 0.002714817 |
| RNF168   | 0.638966528 | 0.008827351 |
| CDC42SE2 | 0.634587162 | 0.041439979 |
| SSR3     | 0.62751801  | 0.037025662 |
| KIAA1109 | 0.624130394 | 0.043581766 |
| TLN1     | 0.621278176 | 0.027596006 |
| CD96     | 0.619635213 | 0.005212307 |
| HNRNPAB  | 0.602394701 | 0.042167593 |
| ARPC2    | 0.59052667  | 0.043058749 |
| CKAP2    | 0.584217332 | 0.005041976 |
| PPM1B    | 0.579414625 | 0.035723713 |
| FAM91A1  | 0.57828396  | 0.036729044 |
| TAF7     | 0.578270044 | 0.027199319 |
| NCOA4    | 0.573412201 | 0.040955733 |
| HOOK3    | 0.572221325 | 0.003975007 |

|          |              |             |
|----------|--------------|-------------|
| ACTG1    | 0.562481913  | 0.029064402 |
| HNRNPR   | 0.550093267  | 0.010078667 |
| CEBPZ    | 0.549583949  | 0.039895102 |
| CD5      | 0.547798939  | 0.010670288 |
| GTPBP1   | 0.547155706  | 0.036279298 |
| CD44     | 0.53029761   | 0.019622056 |
| ARPP19   | 0.52649277   | 0.005469891 |
| FYN      | 0.518881938  | 0.049849217 |
| SERBP1   | 0.50417093   | 7.19604E-04 |
| MORF4L2  | 0.499503812  | 0.042231254 |
| RHOA     | 0.495545354  | 0.034165696 |
| SH3GLB1  | 0.486422542  | 0.004082621 |
| HNRNPA3  | 0.455376612  | 0.031823379 |
| SEC31A   | 0.441443202  | 0.0216398   |
| TAF1D    | -0.364359978 | 0.034299375 |
| XRN2     | -0.423237606 | 0.024833532 |
| ZCCHC11  | -0.425493774 | 0.045983185 |
| STK17B   | -0.439065029 | 0.017361701 |
| PAFAH1B1 | -0.458206168 | 0.011516222 |
| SETD1B   | -0.489649456 | 0.029037444 |
| PCM1     | -0.54607922  | 0.004528741 |
| ELF2     | -0.550286349 | 0.042167593 |
| CCAR1    | -0.555844635 | 4.64049E-04 |
| MIA3     | -0.585720425 | 0.016129697 |
| PSMB8    | -0.594074557 | 0.039579069 |
| PTPRC    | -0.607557866 | 8.08656E-04 |
| TPP2     | -0.619798555 | 1.61324E-04 |
| GCC2     | -0.633377351 | 0.009711927 |
| CENPC    | -0.658178169 | 0.045097496 |
| XPO6     | -0.664894449 | 0.004911952 |
| YEATS2   | -0.665790663 | 0.004202483 |
| CHD3     | -0.682605666 | 0.02908414  |
| CNTRL    | -0.692505938 | 2.09619E-04 |
| SRPK2    | -0.694881064 | 0.008442592 |
| NSRP1    | -0.695523896 | 0.042786648 |
| LDHA     | -0.698042536 | 0.015817551 |
| IL4R     | -0.716961608 | 0.043449692 |
| SNHG15   | -0.733322751 | 0.026385001 |
| IL6ST    | -0.733777484 | 0.010009333 |

|           |              |             |
|-----------|--------------|-------------|
| MYCBP2    | -0.740411583 | 0.047375832 |
| BAZ1A     | -0.743763642 | 9.82018E-04 |
| LEPROTL1  | -0.748602552 | 0.001162156 |
| SFSWAP    | -0.773811905 | 0.017998826 |
| CEP85L    | -0.77474854  | 0.033682096 |
| DCAF5     | -0.778263489 | 0.043825689 |
| LARS      | -0.795411768 | 0.020684075 |
| SARAF     | -0.801454609 | 9.45785E-04 |
| PPP1R2    | -0.806552757 | 0.034834044 |
| TFRC      | -0.830895827 | 0.036575597 |
| TOX       | -0.838963744 | 0.013313602 |
| HIF1A     | -0.846353097 | 0.003783918 |
| PRMT2     | -0.852317822 | 0.048517617 |
| GIMAP5    | -0.852472257 | 0.036136343 |
| UBALD2    | -0.855032074 | 0.040175536 |
| NECAP2    | -0.857615278 | 0.008845996 |
| ZNF721    | -0.859859672 | 0.011605814 |
| TIA1      | -0.863926296 | 8.90E-05    |
| MLLT3     | -0.869966447 | 0.020618179 |
| KIAA1147  | -0.87610454  | 0.011296582 |
| NDFIP1    | -0.876649007 | 0.033122447 |
| CD55      | -0.878060429 | 0.006466351 |
| ATM       | -0.87818082  | 0.002536569 |
| ANAPC5    | -0.884253687 | 0.004663894 |
| LINC01578 | -0.889933576 | 0.005929134 |
| SEMA4D    | -0.893501382 | 0.015295274 |
| OSBPL8    | -0.89448182  | 0.008192105 |
| FAM192A   | -0.895546735 | 0.017361701 |
| MSH2      | -0.910036665 | 0.045097496 |
| CFAP20    | -0.91343581  | 0.042045762 |
| LNPEP     | -0.917307157 | 0.033081474 |
| IL16      | -0.91794795  | 0.011726566 |
| TCF7      | -0.924815711 | 1.39997E-04 |
| LUC7L     | -0.936471429 | 3.93E-08    |
| ARHGEF1   | -0.938808617 | 8.51E-05    |
| CDC25B    | -0.944273466 | 0.049839407 |
| VAV1      | -0.952159559 | 0.007630963 |
| CCDC174   | -0.955378477 | 0.043059219 |
| GNPAT     | -0.956004455 | 0.038430806 |

|            |              |             |
|------------|--------------|-------------|
| MCCC2      | -0.956950301 | 0.022762189 |
| IKZF1      | -0.963963942 | 8.51E-05    |
| UFL1       | -0.964560738 | 0.016861156 |
| BACH2      | -0.974468053 | 0.00012838  |
| CUL4B      | -0.975277372 | 0.02825032  |
| SLC44A2    | -0.976310138 | 0.002142575 |
| ZC3H7A     | -0.977113332 | 8.16656E-04 |
| DIP2A      | -0.977173145 | 0.002142352 |
| RPAP3      | -0.980383643 | 0.003429176 |
| WHAMM      | -0.983037609 | 0.016537549 |
| PLAG1      | -0.984180635 | 2.67E-06    |
| CRTC3      | -0.984815869 | 7.68E-05    |
| IKZF2      | -0.986865143 | 0.003892706 |
| IDH2       | -0.990146687 | 0.045097496 |
| PLXDC1     | -0.993260965 | 0.038919888 |
| NISCH      | -0.993541702 | 0.020339132 |
| STAT6      | -0.997912194 | 0.006696331 |
| SMC4       | -0.998626767 | 5.62549E-04 |
| STK17A     | -1.013770654 | 6.99E-15    |
| FAM76B     | -1.022049615 | 0.01378145  |
| TBC1D2B    | -1.026743264 | 0.004624585 |
| NFYA       | -1.027598901 | 0.022681083 |
| AC135983.2 | -1.028304563 | 0.016088998 |
| KLHDC4     | -1.0294319   | 0.022793132 |
| BTN3A1     | -1.033061413 | 0.02434592  |
| TRIP11     | -1.033949472 | 0.019913545 |
| R3HDM4     | -1.034701176 | 0.0480257   |
| JMJD1C     | -1.037602898 | 1.77876E-04 |
| PMF1       | -1.039432063 | 0.04731046  |
| KIF21B     | -1.042449387 | 0.001959995 |
| R3HDM2     | -1.051739248 | 0.022972064 |
| ARRDC2     | -1.052385847 | 0.005142551 |
| R3HDM1     | -1.06036684  | 0.003012627 |
| HELB       | -1.082352934 | 0.025375155 |
| SOD2       | -1.086324892 | 0.026593945 |
| SORL1      | -1.089332629 | 0.022419176 |
| MSL3       | -1.091320463 | 0.013594497 |
| MAP4K4     | -1.091997611 | 8.32E-08    |
| IL27RA     | -1.093946878 | 0.029406793 |

|            |              |             |
|------------|--------------|-------------|
| RAB3GAP1   | -1.098269216 | 0.01491221  |
| MCM3AP     | -1.099355037 | 0.015337653 |
| LTA4H      | -1.09969505  | 3.31736E-04 |
| NLRP1      | -1.100585575 | 0.011694351 |
| EML3       | -1.106159057 | 0.027199319 |
| MFSD14A    | -1.111575079 | 3.10E-05    |
| ITPKB      | -1.11314989  | 9.30823E-04 |
| TARBP1     | -1.114795511 | 0.008370304 |
| LCP2       | -1.115648319 | 5.48426E-04 |
| PTPRE      | -1.123441216 | 0.005173228 |
| TUBGCP6    | -1.129898688 | 0.041642449 |
| EPB41      | -1.130164609 | 3.39E-08    |
| TGFBR2     | -1.130256533 | 0.004557419 |
| PHF10      | -1.140956279 | 3.51222E-04 |
| ANKRD26    | -1.146259591 | 0.024559623 |
| SYNE1      | -1.147097925 | 1.84627E-04 |
| ZEB1       | -1.158221847 | 2.80E-06    |
| COA1       | -1.161500971 | 1.08E-05    |
| DCK        | -1.174478571 | 0.048188009 |
| TLE4       | -1.182771511 | 2.06E-05    |
| BBX        | -1.187816416 | 0.001244471 |
| RNASET2    | -1.187863477 | 0.028671158 |
| CAPN2      | -1.189070403 | 0.014210783 |
| CCDC18-AS1 | -1.191473597 | 4.27679E-04 |
| VPS8       | -1.192581348 | 0.02434592  |
| TRAP1      | -1.193432089 | 0.048333231 |
| ZNF280D    | -1.193826783 | 0.001674339 |
| TTC13      | -1.205766183 | 0.018808713 |
| MBTD1      | -1.218494925 | 0.011726566 |
| RRN3P1     | -1.219037239 | 3.06E-06    |
| FNIP2      | -1.220679292 | 0.037357844 |
| PRKCQ-AS1  | -1.229319762 | 0.026238946 |
| LRRN3      | -1.231812607 | 0.032337954 |
| MARF1      | -1.233199929 | 2.05608E-04 |
| SDCCAG8    | -1.236007576 | 0.038945682 |
| FBXO32     | -1.236064251 | 0.02152774  |
| RBL2       | -1.237776348 | 0.00057118  |
| TCP11L2    | -1.243128129 | 4.96E-05    |
| TACC3      | -1.255894255 | 0.013131844 |



|            |              |             |
|------------|--------------|-------------|
| IRAK4      | -1.259569815 | 6.59E-05    |
| ZBED5      | -1.262863811 | 0.010476891 |
| ZNF506     | -1.265290052 | 0.033299907 |
| SNHG14     | -1.267173173 | 5.21091E-04 |
| PCED1B-AS1 | -1.268670066 | 0.027013694 |
| GIMAP6     | -1.2714146   | 0.022859334 |
| PCID2      | -1.274164045 | 0.017353301 |
| GXYLT1     | -1.274488579 | 3.42982E-04 |
| SMAP2      | -1.275793735 | 1.45E-22    |
| MRPL1      | -1.299047283 | 0.002289756 |
| KLF3       | -1.305322736 | 9.89E-06    |
| HOOK2      | -1.306628594 | 0.00435287  |
| HPS5       | -1.307863649 | 0.017361701 |
| CRBN       | -1.308686858 | 0.006439803 |
| CAMK1D     | -1.317474617 | 0.036388085 |
| SLC12A6    | -1.329659156 | 0.001129571 |
| IFT80      | -1.329698908 | 0.043909633 |
| AC020916.1 | -1.33503947  | 0.036895952 |
| RALA       | -1.337024853 | 0.011354713 |
| TUBE1      | -1.33777781  | 0.020829652 |
| NEMP1      | -1.346800069 | 0.006562535 |
| ATP11A     | -1.352624438 | 1.74E-05    |
| TLE3       | -1.363443092 | 0.002885059 |
| ZBTB37     | -1.371443488 | 0.012336473 |
| LRRC40     | -1.377069232 | 0.003429176 |
| SDHC       | -1.377085135 | 0.012545506 |
| CD2        | -1.385365916 | 5.55865E-04 |
| STAMBPL1   | -1.388533573 | 0.045432859 |
| SH3BP2     | -1.39092809  | 0.01706832  |
| PIK3IP1    | -1.393447112 | 1.23E-05    |
| PPT1       | -1.404565385 | 0.014251833 |
| ADAT2      | -1.418442718 | 0.001579319 |
| ZNF22      | -1.420774898 | 0.010326638 |
| ZSCAN18    | -1.421780864 | 0.004144741 |
| LDLR       | -1.426489719 | 0.038415402 |
| TBCK       | -1.437454988 | 0.005540536 |
| ZCCHC14    | -1.437516269 | 0.010310282 |
| ABLIM1     | -1.443759538 | 1.13E-06    |
| ADD3       | -1.445509187 | 0.001471376 |

|            |              |             |
|------------|--------------|-------------|
| MVB12B     | -1.453024442 | 0.037895717 |
| MAML2      | -1.45525603  | 1.20E-11    |
| XPC        | -1.45670567  | 0.001027737 |
| DBT        | -1.457596536 | 0.012579682 |
| HS2ST1     | -1.461890898 | 0.02240471  |
| LY9        | -1.462813107 | 0.018808713 |
| USP3       | -1.466385746 | 5.11E-08    |
| ATP8A1     | -1.472625023 | 7.83E-06    |
| RIPOR2     | -1.475508081 | 9.05E-05    |
| ETHE1      | -1.476282781 | 0.04914235  |
| RASA3      | -1.477350156 | 1.92E-06    |
| SSH2       | -1.480087465 | 5.65E-09    |
| COASY      | -1.483402309 | 0.009067537 |
| CEP120     | -1.493153292 | 2.11E-07    |
| ABL2       | -1.494082018 | 0.021294458 |
| LIMD2      | -1.499330774 | 1.50E-12    |
| PRKAG1     | -1.500085078 | 0.024677495 |
| HADH       | -1.501264511 | 0.031685076 |
| STK38      | -1.516750495 | 2.78E-06    |
| NDUFS2     | -1.522424377 | 0.002781665 |
| SIRT5      | -1.525837097 | 0.042167593 |
| KLF7       | -1.534520137 | 8.80234E-04 |
| C17orf62   | -1.535488989 | 0.03880858  |
| AMT        | -1.535657996 | 0.007510605 |
| BIRC2      | -1.538299608 | 1.82265E-04 |
| MFGE8      | -1.538987381 | 6.82916E-04 |
| CMSS1      | -1.544877957 | 0.026786207 |
| EHD4       | -1.553518034 | 0.016304314 |
| CDKN2D     | -1.562777843 | 0.005873518 |
| CERKL      | -1.568562098 | 0.018808713 |
| LYPD3      | -1.569369863 | 3.96E-07    |
| CEPT1      | -1.570649558 | 7.04E-05    |
| GRASP      | -1.574677408 | 0.033497117 |
| AC008105.3 | -1.588708155 | 0.003277779 |
| MAGED2     | -1.589902691 | 0.019993892 |
| PLEKHA1    | -1.592054796 | 6.57523E-04 |
| ZNF496     | -1.600541845 | 0.004085248 |
| PLCG1      | -1.620529723 | 0.005838235 |
| TSSK4      | -1.644210295 | 0.019668692 |

|          |              |             |
|----------|--------------|-------------|
| ATP6V0A2 | -1.648409352 | 0.001310026 |
| SKIL     | -1.663725388 | 5.32E-11    |
| MAP3K4   | -1.682837456 | 0.014343456 |
| POLI     | -1.684211282 | 0.031163075 |
| TRAPPC13 | -1.686289353 | 5.42877E-04 |
| LIMK2    | -1.70910934  | 4.85E-07    |
| AVIL     | -1.719124766 | 0.004758525 |
| WHAMMP3  | -1.73759333  | 0.00319209  |
| SYTL1    | -1.747260622 | 0.029162272 |
| PRKACB   | -1.750854025 | 6.77E-10    |
| CCDC125  | -1.755890404 | 0.045583194 |
| JAK3     | -1.75628037  | 3.67569E-04 |
| GIMAP4   | -1.777227188 | 0.005858241 |
| HDAC7    | -1.780794409 | 0.037357844 |
| AXIN2    | -1.783528758 | 0.009848813 |
| ZMAT1    | -1.788824606 | 4.05E-06    |
| BBS2     | -1.789837655 | 0.036044957 |
| PLEC     | -1.797595696 | 7.84E-07    |
| IKZF3    | -1.798577573 | 6.54749E-04 |
| CUEDC2   | -1.803294288 | 0.042045762 |
| EPHA4    | -1.804441048 | 1.67816E-04 |
| ADGRA3   | -1.816319302 | 0.001066643 |
| LRRC8B   | -1.822592702 | 0.026202012 |
| GTF2H1   | -1.829310907 | 7.27E-06    |
| SAMD3    | -1.830041944 | 0.01668567  |
| TRNT1    | -1.844037444 | 3.40147E-04 |
| NOSIP    | -1.846140244 | 6.24E-05    |
| PDE8B    | -1.85676368  | 0.004727061 |
| ZBTB41   | -1.874510776 | 0.006569311 |
| FYB1     | -1.8766225   | 1.07E-15    |
| DGKA     | -1.880292618 | 4.30E-06    |
| CYB5D2   | -1.900843706 | 0.001614919 |
| PYCR2    | -1.902391912 | 0.021644834 |
| ZNF558   | -1.904096227 | 0.00215036  |
| ZNF623   | -1.906014259 | 9.71666E-04 |
| CEP170   | -1.916839707 | 0.006732069 |
| TANK     | -1.917321709 | 0.015300717 |
| BMP2K    | -1.923861981 | 5.46E-05    |
| SBNO2    | -1.925090586 | 0.010485698 |

|            |              |             |
|------------|--------------|-------------|
| TMOD2      | -1.944732199 | 0.004199255 |
| MOSPD2     | -1.944964315 | 0.046110715 |
| STX3       | -1.969396142 | 0.032539456 |
| TM7SF2     | -1.971222844 | 0.025375155 |
| PTPRK      | -1.978216819 | 0.031115847 |
| TBC1D8     | -1.979407601 | 0.015240567 |
| CHMP7      | -1.990243498 | 0.009848813 |
| GTF2IP20   | -1.993498401 | 0.041213599 |
| APOOL      | -2.008452018 | 3.56103E-04 |
| GPR155     | -2.012449671 | 0.00044895  |
| EIPR1      | -2.014162247 | 0.005666445 |
| LINC01619  | -2.016492238 | 5.89E-05    |
| AC084018.1 | -2.020044332 | 0.010437743 |
| RARA       | -2.022200331 | 0.002908291 |
| YBX1P2     | -2.045875499 | 0.027199319 |
| CCDC77     | -2.051371565 | 0.043581766 |
| CDH23      | -2.06035456  | 4.22295E-04 |
| MYH11      | -2.076657456 | 0.033122447 |
| CHURC1     | -2.104195024 | 0.001553876 |
| AC009812.3 | -2.108951945 | 0.017634771 |
| TRAF3IP3   | -2.132150267 | 0.001056919 |
| ZNRD1ASP   | -2.137750893 | 0.048496358 |
| ZC3H12D    | -2.144892049 | 0.046566933 |
| CSGALNACT1 | -2.147228523 | 0.012336473 |
| PHF23      | -2.15431163  | 0.004395197 |
| AC092953.2 | -2.158308081 | 0.049477811 |
| TXK        | -2.158784399 | 1.35E-05    |
| AP4S1      | -2.183177258 | 7.46E-05    |
| NUCB2      | -2.194443956 | 0.007630963 |
| SCML1      | -2.198146965 | 2.32E-14    |
| MZF1-AS1   | -2.199715144 | 0.002142352 |
| ZC3H6      | -2.225309852 | 0.003892706 |
| FMNL2      | -2.241659033 | 0.006367135 |
| ACAD10     | -2.249908683 | 4.08E-05    |
| RMDN1      | -2.262023847 | 2.77E-08    |
| PGM2L1     | -2.265618008 | 1.55E-09    |
| GIMAP7     | -2.268996571 | 7.93E-11    |
| ALDH16A1   | -2.286916908 | 0.001058314 |
| RASGRP2    | -2.289727153 | 5.56E-11    |

|            |              |             |
|------------|--------------|-------------|
| GCSAM      | -2.296285639 | 4.17779E-04 |
| RRNAD1     | -2.297279418 | 0.016129697 |
| IGSF9B     | -2.29745116  | 1.08701E-04 |
| METTL23    | -2.332309789 | 1.10943E-04 |
| EFHC1      | -2.368150817 | 0.02434592  |
| AL118558.1 | -2.368989721 | 0.003213599 |
| C2CD2      | -2.370144469 | 0.032049135 |
| MIB2       | -2.387285984 | 0.024229319 |
| ZNF561     | -2.407860741 | 4.70E-08    |
| XXYL1      | -2.407940551 | 0.012281854 |
| SFT2D1     | -2.42368637  | 0.004395197 |
| TLE1       | -2.436933748 | 0.004083454 |
| NREP       | -2.445377449 | 0.041523871 |
| APTR       | -2.452026791 | 0.043567047 |
| TONSL      | -2.46329656  | 0.046244311 |
| TMEM63A    | -2.474341484 | 1.81E-15    |
| C1orf35    | -2.480685003 | 0.00435287  |
| AF001548.2 | -2.501017748 | 2.42878E-04 |
| ZNF17      | -2.525954416 | 0.029064402 |
| SMPD1      | -2.544491852 | 1.02E-06    |
| KLF7-IT1   | -2.590276703 | 0.049762722 |
| NEIL1      | -2.64240964  | 0.022529782 |
| TBC1D4     | -2.671456285 | 2.86E-06    |
| CEMIP      | -2.687259873 | 0.016935423 |
| IQSEC1     | -2.694291955 | 1.64E-20    |
| SNX30      | -2.720607063 | 0.006800215 |
| MPPE1      | -2.724845543 | 0.013585658 |
| ZNF815P    | -2.729321215 | 0.013479545 |
| GIMAP8     | -2.748090234 | 0.023185624 |
| GSAP       | -2.792906219 | 0.019177706 |
| CLDN15     | -2.812723009 | 0.001042079 |
| TRAJ53     | -2.819500487 | 0.026835143 |
| AC116407.2 | -2.831170889 | 0.017998826 |
| DCHS1      | -2.846933837 | 0.003669164 |
| AC004847.1 | -2.867661272 | 0.001780999 |
| SRP54-AS1  | -2.874033632 | 0.005837798 |
| S1PR1      | -2.904780641 | 2.44E-14    |
| AC012368.1 | -2.911836745 | 0.010158055 |
| PZP        | -2.91326365  | 0.001487847 |

|            |              |             |
|------------|--------------|-------------|
| ITGA6      | -2.920272739 | 9.24E-07    |
| TENM1      | -2.936464895 | 8.88E-17    |
| LINC01089  | -2.945326485 | 0.004021682 |
| PPIP5K1    | -2.955742543 | 0.02434592  |
| C6orf203   | -2.959277559 | 0.044129782 |
| RNU6-790P  | -2.971778424 | 0.010075912 |
| EPHA1      | -2.986390389 | 0.049939763 |
| ENC1       | -2.986717949 | 2.54E-05    |
| TLDC2      | -3.029347478 | 0.037045665 |
| A2M-AS1    | -3.032877168 | 4.60686E-04 |
| EPHX1      | -3.038617067 | 8.77432E-04 |
| NELL2      | -3.069452714 | 0.00053942  |
| COL6A2     | -3.094040988 | 7.16E-05    |
| VAV3       | -3.101466266 | 1.22E-06    |
| ERVH48-1   | -3.107151224 | 8.78503E-04 |
| IKZF4      | -3.110904093 | 4.20E-05    |
| AC010615.1 | -3.116905199 | 4.39041E-04 |
| DPEP2      | -3.143134374 | 8.43025E-04 |
| NBPF9      | -3.156827451 | 5.17E-07    |
| STX10      | -3.169932841 | 0.042167593 |
| GNPDA1     | -3.21067298  | 0.00565478  |
| PXN        | -3.212207263 | 8.63E-28    |
| EFCAB5     | -3.213756909 | 0.029529209 |
| CDCA7L     | -3.216601908 | 0.001373816 |
| EPHB6      | -3.23318439  | 0.009729454 |
| LRRK1      | -3.251438654 | 0.001174964 |
| ZNF710-AS1 | -3.327764948 | 0.010028691 |
| TSGA10     | -3.330766085 | 0.033359095 |
| FLT3LG     | -3.338255185 | 0.022065136 |
| ZBTB46     | -3.349214618 | 0.015902089 |
| NFKBIL1    | -3.355218156 | 0.037578129 |
| GAL3ST4    | -3.370638136 | 7.85455E-04 |
| CTRC       | -3.387006353 | 0.024677495 |
| LEF1       | -3.401065178 | 4.06E-11    |
| FMC1       | -3.412255844 | 0.019184598 |
| DBP        | -3.424481928 | 0.002638146 |
| CCM2       | -3.453473936 | 1.12E-06    |
| AL591895.1 | -3.459028569 | 7.75E-08    |
| S100B      | -3.48671846  | 0.003320494 |

|            |              |             |
|------------|--------------|-------------|
| CNKS2      | -3.500114323 | 0.023851291 |
| LRR8C      | -3.517109983 | 2.75E-14    |
| CAP5       | -3.553512791 | 0.004362258 |
| RMI2       | -3.580265355 | 0.036388085 |
| SYNM       | -3.59033321  | 1.72E-05    |
| SBK1       | -3.653345841 | 0.03263946  |
| AC012146.1 | -3.695405319 | 0.046078576 |
| UBX8       | -3.743553779 | 0.004348406 |
| MYH3       | -3.771834332 | 9.31E-05    |
| FLT1       | -3.794534559 | 1.22E-12    |
| DEPDC7     | -3.80337756  | 6.74E-05    |
| COL18A1    | -3.830614273 | 9.30E-05    |
| ACTN1      | -3.830860618 | 0.006785604 |
| CASC15     | -3.849784288 | 4.30E-06    |
| AC084824.5 | -3.872853031 | 0.027811057 |
| AREG       | -3.886286252 | 6.62189E-04 |
| DPPA4      | -3.908698686 | 0.00453304  |
| PFKFB2     | -3.925782144 | 6.56E-12    |
| TRABD2A    | -3.928341932 | 7.00E-05    |
| PLCB4      | -3.943855009 | 0.022004742 |
| ZRANB3     | -4.000360031 | 0.002944505 |
| AGAP9      | -4.056272762 | 0.009947906 |
| NAPA-AS1   | -4.073828315 | 0.001553876 |
| KLF3-AS1   | -4.075416106 | 0.029584566 |
| FGFBP2     | -4.079665787 | 0.038462447 |
| GALNT12    | -4.103686707 | 0.005212307 |
| YBX3       | -4.110100184 | 4.26E-32    |
| YPEL4      | -4.13974859  | 0.00903935  |
| MUM1       | -4.15042422  | 6.29E-05    |
| AL355581.1 | -4.170003313 | 0.001553396 |
| HPCAL4     | -4.238101459 | 0.038415402 |
| INSL3      | -4.297934133 | 0.010486825 |
| KLF2       | -4.357336977 | 9.81E-05    |
| AC080112.4 | -4.585775943 | 6.42197E-04 |
| AP000866.2 | -4.618655026 | 0.017797599 |
| SGIP1      | -4.672952581 | 0.007563909 |
| DBH-AS1    | -4.67683174  | 9.58125E-04 |
| PTPRB      | -4.68202712  | 3.53052E-04 |
| MIR4697HG  | -4.745172924 | 1.22325E-04 |

|            |              |             |
|------------|--------------|-------------|
| CHRM5      | -4.768958159 | 1.47E-05    |
| LYPLAL1    | -4.788592481 | 0.013524128 |
| CENPQ      | -4.807912661 | 5.44686E-04 |
| CCR7       | -4.819883556 | 6.96E-12    |
| GRK3       | -4.904836468 | 1.44282E-04 |
| KLRA1P     | -4.907961011 | 1.57E-05    |
| CDR1       | -4.963417413 | 0.005902333 |
| EDAR       | -5.289941563 | 0.027409113 |
| AL512306.2 | -5.32442536  | 0.012420425 |
| AC027449.1 | -5.384730589 | 0.004736431 |
| NBAT1      | -5.707485936 | 0.04241665  |
| LEF1-AS1   | -6.038662422 | 4.03E-08    |
| AL138899.1 | -6.172733671 | 0.005170099 |
| EFNA1      | -6.282037088 | 1.92E-05    |
| ACSS2      | -6.3895244   | 8.70E-05    |
| AC079584.2 | -6.592269135 | 0.001408432 |
| TNFRSF21   | -6.616710808 | 1.42E-18    |
| SSTR3      | -6.663079153 | 1.20212E-04 |
| LINC00452  | -7.366250843 | 2.22196E-04 |
| AC139768.1 | -7.443783181 | 1.74E-06    |
| AC073909.1 | -7.54319669  | 8.45709E-04 |
| PTGIR      | -7.664517747 | 1.84E-07    |
| C11orf21   | -7.92068106  | 3.31E-13    |
| AC093330.2 | -8.186016026 | 1.20E-06    |
| SELL       | -8.333654039 | 6.22E-27    |
| ITGAM      | -8.488649632 | 1.10E-12    |
| SLC14A1    | -9.93337665  | 1.52E-10    |



Supplementary Table 4.  
Core transcriptional signature of  
SI-PLZF<sup>+</sup> CD4<sup>+</sup> T cells

| Gene       | PLZF <sup>+</sup> CD4 <sup>+</sup> T cells<br>vs Va7.2 <sup>+</sup> CD161 <sup>+</sup> T<br>cells<br>LFC | PLZF <sup>+</sup> CD4 <sup>+</sup> T cells v<br>Va7.2 <sup>+</sup> CD161 <sup>+</sup> T cells<br>FDR | PLZF <sup>+</sup> v PLZF<br>CD4 <sup>+</sup> T cells<br>LFC | PLZF <sup>+</sup> v PLZF CD4 <sup>+</sup><br>T cells<br>FDR |
|------------|----------------------------------------------------------------------------------------------------------|------------------------------------------------------------------------------------------------------|-------------------------------------------------------------|-------------------------------------------------------------|
| ADCY6      | 6.429269334                                                                                              | 1.23E-09                                                                                             | 6.357528                                                    | 1.28E-08                                                    |
| WWC3-AS1   | 5.483344109                                                                                              | 5.09746E-04                                                                                          | 5.215813531                                                 | 0.001779452                                                 |
| CDRT4      | 4.964928173                                                                                              | 0.019268641                                                                                          | 4.403287361                                                 | 0.049244741                                                 |
| MMRN1      | 4.856047988                                                                                              | 9.06416E-04                                                                                          | 4.057254931                                                 | 0.013310412                                                 |
| LINC01229  | 4.565746595                                                                                              | 8.02E-05                                                                                             | 11.05731919                                                 | 1.79E-12                                                    |
| AC044781.1 | 4.286583357                                                                                              | 4.43E-09                                                                                             | 1.899908992                                                 | 0.042167593                                                 |
| ZNF319     | 4.117723796                                                                                              | 0.005419629                                                                                          | 4.560102814                                                 | 0.002646053                                                 |
| HLF        | 4.030209517                                                                                              | 0.020298534                                                                                          | 10.47219303                                                 | 2.63E-08                                                    |
| LRP1B      | 3.873635194                                                                                              | 6.57E-10                                                                                             | 2.540930538                                                 | 4.77078E-04                                                 |
| ZSWIM5     | 3.622439575                                                                                              | 0.045404893                                                                                          | 3.937462003                                                 | 0.033678984                                                 |
| SCN3B      | 3.570456559                                                                                              | 0.001778164                                                                                          | 5.034363482                                                 | 5.08E-06                                                    |
| PRR5L      | 3.305889414                                                                                              | 0.033560213                                                                                          | 5.58128309                                                  | 6.74E-05                                                    |
| KLHL29     | 3.238248733                                                                                              | 9.32E-10                                                                                             | 2.225241951                                                 | 2.33485E-04                                                 |
| LINC00892  | 3.236907741                                                                                              | 0.013636345                                                                                          | 5.610420845                                                 | 2.70E-06                                                    |
| RNF165     | 3.226294705                                                                                              | 0.004336233                                                                                          | 8.637605117                                                 | 8.72E-15                                                    |
| GAD1       | 3.128197144                                                                                              | 3.77663E-04                                                                                          | 4.618520213                                                 | 5.13E-08                                                    |
| C2orf66    | 3.127235456                                                                                              | 0.001525214                                                                                          | 2.828690261                                                 | 0.008963127                                                 |
| ATP9A      | 2.950214598                                                                                              | 0.01671815                                                                                           | 4.616796096                                                 | 4.27E-05                                                    |
| DUSP6      | 2.898197389                                                                                              | 7.91E-05                                                                                             | 3.665469474                                                 | 5.88E-07                                                    |
| EGLN3      | 2.743045175                                                                                              | 0.016818901                                                                                          | 4.899664023                                                 | 1.69E-06                                                    |
| LIF        | 2.693260846                                                                                              | 8.53E-05                                                                                             | 7.040804908                                                 | 9.31E-29                                                    |
| RPL23AP55  | 2.609190175                                                                                              | 0.04820469                                                                                           | 3.319917632                                                 | 0.0124767                                                   |
| SAMD4A     | 2.590802564                                                                                              | 0.038714893                                                                                          | 4.157981778                                                 | 2.34087E-04                                                 |
| CHN2       | 2.521450565                                                                                              | 0.004389233                                                                                          | 3.640540946                                                 | 1.43E-05                                                    |
| HOXB3      | 2.51332424                                                                                               | 1.63E-05                                                                                             | 2.503976752                                                 | 5.02E-05                                                    |
| MCOLN3     | 2.502773386                                                                                              | 0.007968557                                                                                          | 3.092730226                                                 | 8.45902E-04                                                 |
| SPART      | 2.502677265                                                                                              | 0.004326857                                                                                          | 2.294929899                                                 | 0.016537549                                                 |
| NPTX1      | 2.459541363                                                                                              | 0.011474571                                                                                          | 2.297794631                                                 | 0.029456578                                                 |
| MID1IP1    | 2.384904452                                                                                              | 7.11769E-04                                                                                          | 2.378127935                                                 | 0.001351606                                                 |
| PALLD      | 2.37310774                                                                                               | 9.04E-07                                                                                             | 2.928489099                                                 | 2.52E-09                                                    |
| PGAP1      | 2.300859577                                                                                              | 3.42388E-04                                                                                          | 1.663795246                                                 | 0.028362535                                                 |
| RIPOR3     | 2.294236901                                                                                              | 0.041671171                                                                                          | 2.557703113                                                 | 0.025327145                                                 |
| UBE2F      | 2.274067717                                                                                              | 6.53E-13                                                                                             | 1.091441285                                                 | 0.006367135                                                 |

|            |             |             |             |             |
|------------|-------------|-------------|-------------|-------------|
| ZNF462     | 2.26674392  | 9.04E-05    | 1.466822315 | 0.038601103 |
| PLA2G16    | 2.23740614  | 0.008546397 | 2.142495076 | 0.019177706 |
| ESR2       | 2.219514767 | 0.001254172 | 2.242722726 | 0.001965314 |
| NLRP6      | 2.128440154 | 1.01E-05    | 2.744832445 | 1.34E-08    |
| DOCK5      | 2.111749026 | 1.02E-06    | 3.268066104 | 1.59E-14    |
| GRAMD1B    | 2.094829236 | 2.82E-08    | 2.2580185   | 9.82E-09    |
| SNX18      | 2.082552529 | 0.013126444 | 3.109226851 | 6.80E-05    |
| CST7       | 2.076828727 | 1.12E-05    | 3.788878856 | 4.28E-17    |
| IL2        | 2.040731993 | 0.002126244 | 2.773988315 | 1.63E-05    |
| ASB2       | 2.03212369  | 0.004412941 | 4.921496898 | 2.80E-15    |
| RCBTB2     | 1.986461102 | 0.03291841  | 2.114755526 | 0.027281279 |
| P2RY14     | 1.953018896 | 4.91E-05    | 2.457912062 | 3.40E-07    |
| SCUBE1     | 1.946656456 | 0.048658702 | 2.078093478 | 0.041213599 |
| DUSP4      | 1.935592938 | 2.39835E-04 | 3.212593392 | 1.02E-10    |
| GAB2       | 1.927053275 | 2.98E-21    | 2.463105625 | 5.04E-32    |
| AL390208.1 | 1.923882103 | 0.048683543 | 2.750205915 | 0.003012627 |
| DTX1       | 1.918442078 | 6.84025E-04 | 3.886459974 | 3.85E-14    |
| ARHGEF12   | 1.903626071 | 0.005521805 | 1.82357239  | 0.013386581 |
| BCL2A1     | 1.900922167 | 3.08E-08    | 2.544615267 | 2.33E-13    |
| MAP3K8     | 1.827426214 | 7.66E-05    | 3.944471768 | 2.00E-20    |
| ATXN7L2    | 1.806631178 | 0.003786258 | 1.539602951 | 0.027744659 |
| PDCD1      | 1.798317904 | 0.029557672 | 3.258678204 | 6.25E-06    |
| CD40LG     | 1.791625725 | 2.60E-10    | 2.280265164 | 3.68E-15    |
| IRAK2      | 1.791215116 | 0.013096404 | 2.936982543 | 7.50E-06    |
| LRIG1      | 1.77813719  | 2.75E-06    | 1.266794912 | 0.004227078 |
| GPR137B    | 1.755314343 | 0.03797555  | 1.772165889 | 0.046278703 |
| SLC1A4     | 1.741573746 | 2.31966E-04 | 2.009789943 | 2.76E-05    |
| GRK5       | 1.741344318 | 9.47E-34    | 1.071309111 | 2.44E-11    |
| PRKAB1     | 1.738384414 | 1.42375E-04 | 1.536219478 | 0.002201265 |
| LPAR6      | 1.733554288 | 0.00690225  | 2.109037064 | 8.77658E-04 |
| DUSP5      | 1.690242777 | 0.00260957  | 3.343285006 | 3.63E-11    |
| IL18RAP    | 1.660853557 | 0.005919817 | 6.005377187 | 4.87E-33    |
| GLB1       | 1.657827044 | 3.27778E-04 | 1.984764785 | 1.80E-05    |
| DLL1       | 1.65682454  | 1.35E-05    | 3.614258304 | 3.94E-24    |
| KIAA0040   | 1.638966347 | 0.036077961 | 1.651319189 | 0.044646237 |
| XCL2       | 1.633672504 | 0.032372686 | 3.799128896 | 2.23E-09    |
| RALB       | 1.629340774 | 0.038714893 | 2.363240085 | 0.001174964 |
| PRKAB2     | 1.628105641 | 0.009660066 | 1.514643211 | 0.026746326 |
| PBX4       | 1.623857186 | 0.001995104 | 1.96453625  | 1.77876E-04 |

|           |             |             |             |             |
|-----------|-------------|-------------|-------------|-------------|
| SSH1      | 1.604669235 | 4.47E-08    | 1.404632377 | 1.08E-05    |
| ZNF571    | 1.582411465 | 0.001302104 | 1.435799356 | 0.007676839 |
| HNRNPLL   | 1.581613001 | 1.65229E-04 | 1.558132109 | 4.60686E-04 |
| LINC01871 | 1.515430174 | 0.036390225 | 4.154141171 | 1.38E-12    |
| OTUD7B    | 1.488539744 | 0.001740296 | 2.422114155 | 7.96E-08    |
| IL18R1    | 1.487277504 | 1.59E-07    | 3.794365351 | 8.53E-45    |
| ARHGAP21  | 1.48166889  | 8.51E-05    | 1.526523147 | 1.07318E-04 |
| AHR       | 1.476178037 | 0.001256224 | 1.2527915   | 0.014673472 |
| EPAS1     | 1.465748048 | 9.00E-06    | 1.376821078 | 9.92E-05    |
| SPAG5     | 1.396491743 | 0.014560646 | 2.058281483 | 1.04887E-04 |
| ZCCHC2    | 1.359203267 | 2.11E-07    | 1.225802413 | 1.48E-05    |
| TRAT1     | 1.356413378 | 2.43406E-04 | 1.243202861 | 0.001932887 |
| IL2RB     | 1.323652319 | 2.11E-07    | 1.30297757  | 1.46E-06    |
| ADAM19    | 1.316259741 | 2.43406E-04 | 2.407007194 | 6.00E-13    |
| TESC      | 1.315119816 | 0.041969377 | 1.45355237  | 0.027231616 |
| CCR4      | 1.300548366 | 0.002484828 | 2.078019248 | 2.32E-07    |
| LINC00963 | 1.297655804 | 1.02E-05    | 1.527730694 | 3.42E-07    |
| WEE1      | 1.27098518  | 9.42496E-04 | 1.265899033 | 0.001832888 |
| ZNF552    | 1.268294341 | 0.001528616 | 1.591030643 | 6.04E-05    |
| ID2       | 1.257197627 | 8.23E-05    | 2.050933468 | 1.60E-11    |
| IL32      | 1.235455541 | 0.039138046 | 1.37789157  | 0.023390166 |
| KIF3B     | 1.234412867 | 0.011680284 | 1.459164464 | 0.002853663 |
| PIK3R1    | 1.228170543 | 0.006777556 | 1.571956406 | 3.67569E-04 |
| CPD       | 1.220829745 | 1.48E-05    | 1.964129675 | 5.97E-13    |
| RARRES3   | 1.215911303 | 5.66E-05    | 1.319744271 | 2.22E-05    |
| PLIN2     | 1.190645879 | 5.76098E-04 | 1.511244701 | 1.01E-05    |
| CD59      | 1.189825849 | 0.005828647 | 1.125471545 | 0.015863849 |
| ZFP30     | 1.175193109 | 0.010574414 | 2.529458566 | 2.44E-10    |
| AMZ2      | 1.171348279 | 0.001538041 | 1.161243033 | 0.003183449 |
| ANXA11    | 1.158404462 | 1.21E-05    | 1.316166221 | 1.31E-06    |
| GLO1      | 1.135473089 | 0.007912482 | 1.936130342 | 6.28E-07    |
| EPSTI1    | 1.131373255 | 0.01459934  | 1.081290205 | 0.029584566 |
| FADS3     | 1.113446283 | 0.021137958 | 1.268125574 | 0.009041148 |
| ARAP2     | 1.101276605 | 0.019505157 | 1.148876122 | 0.019154926 |
| TMEM9B    | 1.0846513   | 2.25088E-04 | 1.040262435 | 0.00089946  |
| RASGRF2   | 1.070757581 | 0.001814669 | 2.118504141 | 9.52E-12    |
| ATP1B3    | 1.063162408 | 0.031176216 | 1.519320746 | 8.77432E-04 |
| MIR22HG   | 1.044716848 | 6.13354E-04 | 1.299038665 | 1.76E-05    |
| SEC24D    | 1.037055295 | 0.010942819 | 1.149121729 | 0.005744698 |

|            |              |             |              |             |
|------------|--------------|-------------|--------------|-------------|
| ITGAM      | -9.855358803 | 2.58E-18    | -8.488649632 | 1.10E-12    |
| C11orf21   | -9.791822508 | 1.30E-20    | -7.92068106  | 3.31E-13    |
| SELL       | -8.31095405  | 1.36E-29    | -8.333654039 | 6.22E-27    |
| S100B      | -6.852041938 | 6.95E-13    | -3.48671846  | 0.003320494 |
| TNFRSF21   | -6.231404844 | 9.92E-18    | -6.616710808 | 1.42E-18    |
| EFNA1      | -6.179918855 | 1.19E-05    | -6.282037088 | 1.92E-05    |
| SBK1       | -6.042240409 | 1.11E-05    | -3.653345841 | 0.03263946  |
| COL6A2     | -5.436250169 | 2.28E-16    | -3.094040988 | 7.16E-05    |
| LEF1-AS1   | -5.351419765 | 6.68E-07    | -6.038662422 | 4.03E-08    |
| CCR7       | -5.186539819 | 2.91E-15    | -4.819883556 | 6.96E-12    |
| AC012146.1 | -5.029466164 | 0.001442124 | -3.695405319 | 0.046078576 |
| AC080112.4 | -4.958332815 | 7.19E-05    | -4.585775943 | 6.42197E-04 |
| AL355581.1 | -4.808370069 | 6.53E-05    | -4.170003313 | 0.001553396 |
| AC027449.1 | -4.674174513 | 0.014381859 | -5.384730589 | 0.004736431 |
| KLRA1P     | -4.640764265 | 2.58E-05    | -4.907961011 | 1.57E-05    |
| GRK3       | -4.612923765 | 2.25375E-04 | -4.904836468 | 1.44282E-04 |
| MIR4697HG  | -4.588024217 | 1.05563E-04 | -4.745172924 | 1.22325E-04 |
| DPPA4      | -4.577061993 | 2.25975E-04 | -3.908698686 | 0.00453304  |
| YBX3       | -4.513975734 | 3.25E-43    | -4.110100184 | 4.26E-32    |
| SGIP1      | -4.43023322  | 0.008844203 | -4.672952581 | 0.007563909 |
| FLT1       | -4.29838274  | 4.91E-18    | -3.794534559 | 1.22E-12    |
| KLF2       | -4.054853615 | 1.79496E-04 | -4.357336977 | 9.81E-05    |
| PFKFB2     | -3.906583607 | 4.96E-13    | -3.925782144 | 6.56E-12    |
| CAPN5      | -3.824309907 | 9.04085E-04 | -3.553512791 | 0.004362258 |
| ACTN1      | -3.739300951 | 0.005561547 | -3.830860618 | 0.006785604 |
| DBP        | -3.738866805 | 3.85266E-04 | -3.424481928 | 0.002638146 |
| FLT3LG     | -3.72776577  | 0.0048542   | -3.338255185 | 0.022065136 |
| AC116407.2 | -3.692188453 | 3.65061E-04 | -2.831170889 | 0.017998826 |
| AL591895.1 | -3.683762268 | 1.20E-09    | -3.459028569 | 7.75E-08    |
| PLCB4      | -3.561708772 | 0.035489516 | -3.943855009 | 0.022004742 |
| EPHB6      | -3.542632594 | 0.001932993 | -3.23318439  | 0.009729454 |
| ZBTB46     | -3.521115313 | 0.006288875 | -3.349214618 | 0.015902089 |
| CDCA7L     | -3.50908957  | 1.60226E-04 | -3.216601908 | 0.001373816 |
| MUM1       | -3.505226335 | 7.40447E-04 | -4.15042422  | 6.29E-05    |
| UBXN8      | -3.460922117 | 0.006976169 | -3.743553779 | 0.004348406 |
| SNX30      | -3.450700466 | 9.16E-05    | -2.720607063 | 0.006800215 |
| NAPA-AS1   | -3.411373864 | 0.00900041  | -4.073828315 | 0.001553876 |
| RMI2       | -3.354411879 | 0.043484839 | -3.580265355 | 0.036388085 |
| GALNT12    | -3.261066355 | 0.032596862 | -4.103686707 | 0.005212307 |

|            |              |             |              |             |
|------------|--------------|-------------|--------------|-------------|
| AREG       | -3.247531714 | 0.004722628 | -3.886286252 | 6.62189E-04 |
| DCHS1      | -3.22636025  | 2.91883E-04 | -2.846933837 | 0.003669164 |
| A2M-AS1    | -3.212885031 | 7.19E-05    | -3.032877168 | 4.60686E-04 |
| NELL2      | -3.149685887 | 1.60226E-04 | -3.069452714 | 0.00053942  |
| ALDH16A1   | -3.115300538 | 3.34E-07    | -2.286916908 | 0.001058314 |
| DEPDC7     | -3.105331757 | 0.001417549 | -3.80337756  | 6.74E-05    |
| IGSF9B     | -3.003445    | 1.40E-08    | -2.29745116  | 1.08701E-04 |
| TLE1       | -2.938752978 | 1.04305E-04 | -2.436933748 | 0.004083454 |
| AC020916.1 | -2.914025921 | 1.42E-09    | -1.33503947  | 0.036895952 |
| MYH3       | -2.853609322 | 0.004353586 | -3.771834332 | 9.31E-05    |
| ZRANB3     | -2.837455465 | 0.049265389 | -4.000360031 | 0.002944505 |
| SYTL1      | -2.834337835 | 1.19E-05    | -1.747260622 | 0.029162272 |
| ENC1       | -2.786827984 | 4.82E-05    | -2.986717949 | 2.54E-05    |
| CEMIP      | -2.734866848 | 0.009959911 | -2.687259873 | 0.016935423 |
| RARA       | -2.712801148 | 4.18E-06    | -2.022200331 | 0.002908291 |
| LRRC8C     | -2.705015697 | 2.83E-09    | -3.517109983 | 2.75E-14    |
| DPEP2      | -2.691784208 | 0.004219495 | -3.143134374 | 8.43025E-04 |
| GRASP      | -2.611156867 | 1.12E-05    | -1.574677408 | 0.033497117 |
| AP4S1      | -2.593540245 | 2.31E-07    | -2.183177258 | 7.46E-05    |
| NBPF9      | -2.569084907 | 4.59E-05    | -3.156827451 | 5.17E-07    |
| RNU6-790P  | -2.568433986 | 0.027101561 | -2.971778424 | 0.010075912 |
| TRABD2A    | -2.564828822 | 0.017342458 | -3.928341932 | 7.00E-05    |
| NUCB2      | -2.554921005 | 5.59727E-04 | -2.194443956 | 0.007630963 |
| NREP       | -2.472893164 | 0.02947269  | -2.445377449 | 0.041523871 |
| AC004847.1 | -2.456685891 | 0.007455848 | -2.867661272 | 0.001780999 |
| LEF1       | -2.443523549 | 2.54E-06    | -3.401065178 | 4.06E-11    |
| CLDN15     | -2.417387207 | 0.004773213 | -2.812723009 | 0.001042079 |
| IQSEC1     | -2.404209449 | 4.91E-18    | -2.694291955 | 1.64E-20    |
| EFHC1      | -2.384652334 | 0.016333993 | -2.368150817 | 0.02434592  |
| GAL3ST4    | -2.375927121 | 0.028106448 | -3.370638136 | 7.85455E-04 |
| ZNF815P    | -2.364903691 | 0.032878577 | -2.729321215 | 0.013479545 |
| S1PR1      | -2.362298185 | 2.09E-10    | -2.904780641 | 2.44E-14    |
| PCED1B-AS1 | -2.329910108 | 2.31E-07    | -1.268670066 | 0.027013694 |
| MVB12B     | -2.325455268 | 3.92E-05    | -1.453024442 | 0.037895717 |
| PXN        | -2.274114934 | 3.60E-15    | -3.212207263 | 8.63E-28    |
| PLCG1      | -2.265986924 | 6.76E-06    | -1.620529723 | 0.005838235 |
| EPHX1      | -2.238994308 | 0.020545478 | -3.038617067 | 8.77432E-04 |
| RRNAD1     | -2.175573465 | 0.018552587 | -2.297279418 | 0.016129697 |
| MFGE8      | -2.167004249 | 3.86E-08    | -1.538987381 | 6.82916E-04 |

|            |              |             |              |             |
|------------|--------------|-------------|--------------|-------------|
| ITGA6      | -2.151057386 | 4.15361E-04 | -2.920272739 | 9.24E-07    |
| EPHA4      | -2.119304122 | 1.12E-06    | -1.804441048 | 1.67816E-04 |
| TENM1      | -2.095910159 | 2.13E-09    | -2.936464895 | 8.88E-17    |
| CASC15     | -2.076012282 | 0.032389446 | -3.849784288 | 4.30E-06    |
| METTL23    | -2.006705842 | 8.07769E-04 | -2.332309789 | 1.10943E-04 |
| SAMD3      | -2.006197077 | 0.00410829  | -1.830041944 | 0.01668567  |
| CCDC125    | -1.998876456 | 0.011617003 | -1.755890404 | 0.045583194 |
| ZNF496     | -1.926333703 | 1.06989E-04 | -1.600541845 | 0.004085248 |
| TM7SF2     | -1.918334394 | 0.023271147 | -1.971222844 | 0.025375155 |
| PLEC       | -1.906786713 | 2.04E-08    | -1.797595696 | 7.84E-07    |
| HADH       | -1.897806315 | 0.001747766 | -1.501264511 | 0.031685076 |
| CCM2       | -1.87728473  | 0.020520576 | -3.453473936 | 1.12E-06    |
| CDH23      | -1.809054651 | 0.001703358 | -2.06035456  | 4.22295E-04 |
| LYPD3      | -1.808136861 | 2.23E-10    | -1.569369863 | 3.96E-07    |
| TXK        | -1.761581987 | 3.92078E-04 | -2.158784399 | 1.35E-05    |
| SKIL       | -1.728639276 | 4.35E-13    | -1.663725388 | 5.32E-11    |
| TMEM63A    | -1.726499924 | 2.82E-08    | -2.474341484 | 1.81E-15    |
| MZF1-AS1   | -1.7172842   | 0.020947211 | -2.199715144 | 0.002142352 |
| USP3       | -1.712961867 | 4.42E-12    | -1.466385746 | 5.11E-08    |
| AXIN2      | -1.705430504 | 0.010149782 | -1.783528758 | 0.009848813 |
| CAPN2      | -1.702296873 | 3.08E-05    | -1.189070403 | 0.014210783 |
| GIMAP4     | -1.672152906 | 0.007349886 | -1.777227188 | 0.005858241 |
| ADGRA3     | -1.635748673 | 0.002709826 | -1.816319302 | 0.001066643 |
| PPT1       | -1.627103811 | 0.001528616 | -1.404565385 | 0.014251833 |
| LDLR       | -1.624105062 | 0.008979503 | -1.426489719 | 0.038415402 |
| NOSIP      | -1.615706225 | 0.00037664  | -1.846140244 | 6.24E-05    |
| SH3BP2     | -1.609388362 | 0.002041651 | -1.39092809  | 0.01706832  |
| RBL2       | -1.598634625 | 5.27E-07    | -1.237776348 | 0.00057118  |
| TLE4       | -1.542332776 | 6.12E-10    | -1.182771511 | 2.06E-05    |
| ZNF22      | -1.518408117 | 0.002974036 | -1.420774898 | 0.010326638 |
| MAP3K4     | -1.516602402 | 0.02515865  | -1.682837456 | 0.014343456 |
| ZBTB41     | -1.432716607 | 0.047691348 | -1.874510776 | 0.006569311 |
| AC008105.3 | -1.402267445 | 0.008795521 | -1.588708155 | 0.003277779 |
| LY9        | -1.395058724 | 0.020053231 | -1.462813107 | 0.018808713 |
| LTA4H      | -1.390813084 | 3.49E-07    | -1.09969505  | 3.31736E-04 |
| LINC01619  | -1.39024118  | 0.009768915 | -2.016492238 | 5.89E-05    |
| NDUFS2     | -1.378093374 | 0.005561547 | -1.522424377 | 0.002781665 |
| GIMAP7     | -1.340570919 | 3.24291E-04 | -2.268996571 | 7.93E-11    |
| RASGRP2    | -1.330181074 | 3.83857E-04 | -2.289727153 | 5.56E-11    |

|            |              |             |              |             |
|------------|--------------|-------------|--------------|-------------|
| SORL1      | -1.325133334 | 0.001557962 | -1.089332629 | 0.022419176 |
| KLF3       | -1.284753128 | 4.49E-06    | -1.305322736 | 9.89E-06    |
| KLHDC4     | -1.229800641 | 0.002075047 | -1.0294319   | 0.022793132 |
| SNHG14     | -1.208690888 | 0.00059194  | -1.267173173 | 5.21091E-04 |
| RASA3      | -1.200535522 | 1.04771E-04 | -1.477350156 | 1.92E-06    |
| PIK3IP1    | -1.1951371   | 1.39868E-04 | -1.393447112 | 1.23E-05    |
| ABLIM1     | -1.17967497  | 6.41E-05    | -1.443759538 | 1.13E-06    |
| DGKA       | -1.156447373 | 0.00985195  | -1.880292618 | 4.30E-06    |
| FYB1       | -1.14845902  | 1.72E-06    | -1.8766225   | 1.07E-15    |
| ZNF561     | -1.131157833 | 0.032389446 | -2.407860741 | 4.70E-08    |
| BMP2K      | -1.120506094 | 0.038738816 | -1.923861981 | 5.46E-05    |
| PGM2L1     | -1.103265937 | 0.010654398 | -2.265618008 | 1.55E-09    |
| PCID2      | -1.085314825 | 0.043484839 | -1.274164045 | 0.017353301 |
| STK38      | -1.080469121 | 0.001303451 | -1.516750495 | 2.78E-06    |
| SCML1      | -1.077462633 | 6.84238E-04 | -2.198146965 | 2.32E-14    |
| ATP8A1     | -1.044338286 | 0.002323138 | -1.472625023 | 7.83E-06    |
| NFYA       | -1.037113551 | 0.014611824 | -1.027598901 | 0.022681083 |
| RIPOR2     | -1.035141014 | 0.009736783 | -1.475508081 | 9.05E-05    |
| CCDC18-AS1 | -1.022310751 | 0.002325102 | -1.191473597 | 4.27679E-04 |

Supplementary Table 5. Demographic characteristics of patients with gastroschisis.

|                       | Gastroschisis (n=8) | Healthy Term controls (n=23) |
|-----------------------|---------------------|------------------------------|
| Maternal age (y)      | 32 (18-43)          | 28 (18-45)                   |
| Cesarian delivery     | 37.5%               | 38%                          |
| Presence of labor     | 14%                 |                              |
| Gestational age (wks) | 36 5/7 (35-37)      | 38 3/7 (37 – 41)             |
| Male fetus            | 75%                 |                              |
| Birth weight (gr)     | 2495                | 3052                         |

Data are presented as average (range) or %.



Supplementary Table 6. Demographic characteristics of patients with preterm birth.

|                       | Preterm birth (n=22)   | Healthy Term controls (n=23) |
|-----------------------|------------------------|------------------------------|
| Maternal age (y)      | 35 (28-41)             | 28 (18-45)                   |
| Cesarian delivery     | 53%                    | 38%                          |
| Presence of labor     | 64%                    |                              |
| Gestational age (wks) | 33 4/7 (25 0/7-36 2/7) | 38 3/7 (37 – 41)             |
| Male fetus            | 47%                    |                              |
| Birth weight (gr)     | 1970                   | 3052                         |

Data are presented as average (range) or %.
